# Supplementary material for: In(iii)-pybox complex catalyzed enantioselective Mukaiyama aldol reactions between polymeric or hydrated glyoxylates and enolsilanes derived from aryl ketones
Source: Royal Society of Chemistry journal article supplement (doi:10.1039/c0sc00454e), 2010-10-28

# **In(III)-Pybox Complex Catalyzed Enantioselective Mukaiyama Aldol Reactions between Polymeric or Hydrated Glyoxylates and Enolsilanes Derived from Aryl Ketones**

**Jun-Feng Zhao, Boon-Hong Tan and Teck-Peng Loh\***

Division of Chemistry and Biological Chemistry, School of Physical and Mathematical Sciences,  
Nanyang Technological University, Singapore 637371  
E-mail: teckpeng@ntu.edu.sg

## **Supporting Information**

### **Table of Contents**

Page

|                                                                    |      |
|--------------------------------------------------------------------|------|
| General Methods                                                    | S-1  |
| Preliminary Studies of Reaction Conditions                         | S-2  |
| General Procedure for the Preparation of Silyl Enol Ether          | S-5  |
| General procedure for Asymmetric Mukaiyama Aldol reactions         | S-12 |
| Characterization Data for Enantioenriched Alcohols                 | S-12 |
| <sup>1</sup> H-NMR, <sup>13</sup> C-NMR, HPLC and GC Chromatograms | S-22 |

## General Methods

Analytical thin layer chromatography (TLC) was performed using Merck 60 F254 pre-coated silica gel plate (0.2 mm thickness). Subsequent to elution, plates were visualized using UV radiation (254 nm) on Spectroline Model ENF-24061/F 254 nm. Further visualization was possible by staining with basic solution of potassium permanganate or acidic solution of ceric molybdate.

Flash chromatography was performed using Merck silica gel 60 with freshly distilled solvents. Columns were typically packed as slurry and equilibrated with the appropriate solvent system prior to use.

Infrared spectra were recorded on a Bio-Rad FTS 165 FTIR spectrometer. The oil samples were examined under neat conditions.

High Resolution Mass (HRMS) spectra were obtained using Waters Q-ToF Premier Mass Spectrometer.

Proton nuclear magnetic resonance spectra ( $^1\text{H}$  NMR) were recorded on a Bruker Avance DPX 300 and Bruker AMX 400 spectrophotometer ( $\text{CDCl}_3$  as solvent). Chemical shifts for  $^1\text{H}$  NMR spectra are reported as  $\delta$  in units of parts per million (ppm) downfield from  $\text{SiMe}_4$  ( $\delta$  0.0) and relative to the signal of chloroform-*d* ( $\delta$  7.2600, singlet). Multiplicities were given as: s (singlet); d (doublet); t (triplet); q (quartet); dd (doublets of doublet); ddd (doublets of doublets of doublet); dddd (doublets of doublets of doublets of doublet); dt (doublets of triplet); or m (multiplets). The number of protons (*n*) for a given resonance is indicated by *n*H. Coupling constants are reported as a *J* value in Hz. Carbon nuclear magnetic resonance spectra ( $^{13}\text{C}$  NMR) are reported as  $\delta$  in units of parts per million (ppm) downfield from  $\text{SiMe}_4$  ( $\delta$  0.0) and relative to the signal of chloroform-*d* ( $\delta$  77.0, triplet). Enantioselectivities were determined by HPLC analysis employing a Daicel Chiracel column at 25 °C and chiral GC. Optical rotation was measured using a JASCO P-1030 Polarimeter equipped with a sodium vapor lamp at 589 nm. Concentration is denoted as *c* and was calculated as grams per deciliters (g / 100mL). Absolute configuration of the products was determined by comparison with known compounds.

## Preliminary studies of reaction conditions

Initially, we chose polymeric ethyl glyoxylate (50% in toluene) and acetophenone-derived enolsilane as the model substrates to optimize reaction conditions (for details of condition optimization, see Tables 1-5 in the Supporting Information). The solvent, ligand, temperature, additive, catalyst loading and counterion effect were all evaluated. Polar solvents such as CH<sub>3</sub>CN and THF proved to be better than non-polar solvents. Pybox (+)-**1** is the best choice of ligand and box ligands are ineffective for this transformation. With decreasing temperature, the enantioselectivity was favored to increase. Based on the optimization studies, we found that the combination of 5 mol% of InBr<sub>3</sub>, 5 mol% of AgSbF<sub>6</sub> and 6 mol% of pybox (+)-**1** with CH<sub>3</sub>CN as the solvent in the presence of 4 Å molecular sieves was the best catalytic system.

**Table 1.** Screening of solvents<sup>a</sup>

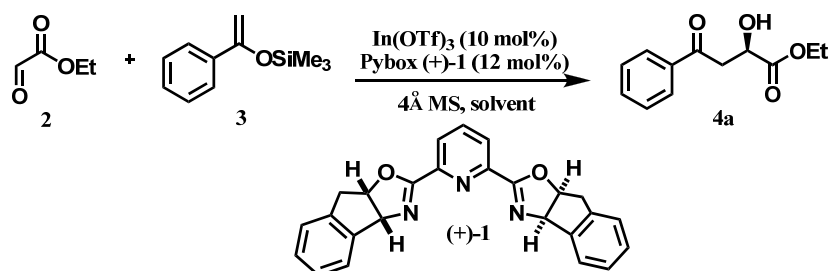

| entry | solvent                         | temperature (°C) | reaction time (h) | yield (%) <sup>b</sup> | ee (%) <sup>c</sup> |
|-------|---------------------------------|------------------|-------------------|------------------------|---------------------|
| 1     | DCE                             | -20              | 28                | 60                     | 51                  |
| 2     | MeNO <sub>2</sub>               | -20              | 27                | 68                     | 74                  |
| 3     | Acetone                         | -40              | 35                | 63                     | 11                  |
| 4     | Toluene                         | -40              | 35                | 22                     | 11                  |
| 5     | MeOH                            | -40              | 39                | 46                     | 15                  |
| 6     | CH <sub>2</sub> Cl <sub>2</sub> | -40              | 39                | 71                     | 53                  |
| 7     | CHCl <sub>3</sub>               | -40              | 35                | 86                     | 54                  |
| 8     | EtOAc                           | -40              | 35                | 49                     | 69                  |
| 9     | THF                             | -40              | 39                | 34                     | 71                  |
| 10    | <i>i</i> PrNO <sub>2</sub>      | -40              | 35                | 42                     | 76                  |
| 11    | MeCN                            | -40              | 39                | 56                     | 80                  |
| 12    | EtCN                            | -40              | 39                | 71                     | 78                  |
| 13    | EtCN                            | -60              | 90                | 42                     | 70                  |
| 14    | EtCN                            | -78              | 90                | 31                     | 66                  |

<sup>a</sup> Unless noted otherwise, the reactions were carried out on a 0.50 mmol scale of **3** with 2 equiv of **2** (1 mmol).

<sup>b</sup> Isolated yield.

<sup>c</sup> Ee values were determined by chiral-phase HPLC analysis and the absolute configuration of the major products was *R*, assigned by comparing HPLC with the literature.

**Table 2.** Screening of chiral ligands<sup>a</sup>

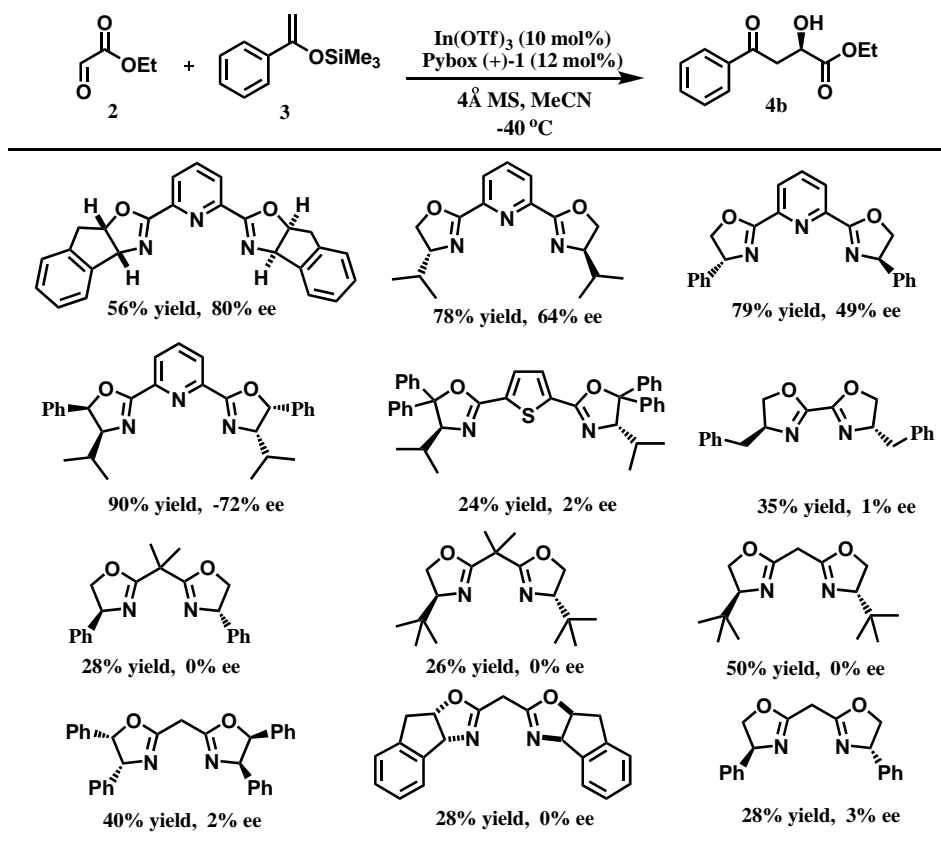

<sup>a</sup> Reactions were carried out with 0.75 mmol of ethyl glyoxylate and 0.50 mmol of enolsilane in the presence of 150 mg powdered activated 4Å molecular sieves in 2.0 mL of solvent.

<sup>b</sup> Isolated yield.

<sup>c</sup> *ee* values were determined by chiral stationary phase HPLC analysis. The absolute configuration of the major products was *R*, assigned by comparing the optical rotation with the literature.

**Table 3.** Investigation of different Lewis acid<sup>a</sup>

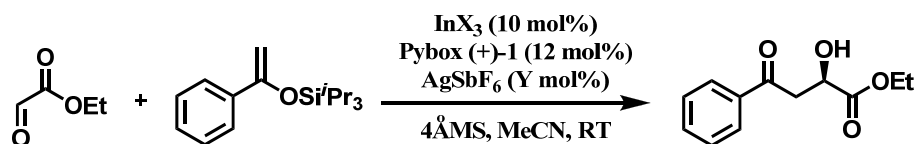

| entry            | LA                   | AgSbF <sub>6</sub> | reaction time (h) | yield (%) <sup>b</sup> | ee (%) <sup>c</sup> |
|------------------|----------------------|--------------------|-------------------|------------------------|---------------------|
| 1                | In(OTf) <sub>3</sub> | –                  | 2                 | 97                     | 77                  |
| 2                | Sc(OTf) <sub>3</sub> | –                  | 30                | 63                     | 47                  |
| 3                | Cu(OTf) <sub>2</sub> | –                  | 48                | 7 conversion           | 0                   |
| 4                | Zn(OTf) <sub>2</sub> | –                  | 24                | 75 conversion          | 3                   |
| 5 <sup>d</sup>   | CuCl <sub>2</sub>    | 20%                | 72                | 82 conversion          | -37                 |
| 6                | CuCl <sub>2</sub>    | 20%                | 72                | 20 conversion          | 6                   |
| 7 <sup>e</sup>   | PdCl <sub>2</sub>    | 20%                | 4                 | 54                     | -35                 |
| 8 <sup>f,g</sup> | FeBr <sub>3</sub>    | 20%                | 2                 | 30                     | 49                  |
| 9 <sup>d,g</sup> | SnCl <sub>2</sub>    | 20%                | 2                 | 96                     | -16                 |
| 10               | InBr <sub>3</sub>    | 10%                | 2                 | 98                     | 80                  |

<sup>a</sup> Reactions were carried out with 0.75 mmol of ethyl glyoxylate and 0.50 mmol of enolsilane in the presence of 150 mg powdered activated 4Å molecular sieves in 2.0 mL of MeCN.

<sup>b</sup> Isolated yield.

<sup>c</sup> *ee* values were determined by chiral stationary phase HPLC analysis.

<sup>d</sup> BOX used as ligand.

<sup>e</sup> R-(+)-SEGPHOS used as ligand.

<sup>f</sup> Enol silane hydrolyzed product 45%.

<sup>g</sup> Dichloromethane used as solvent.

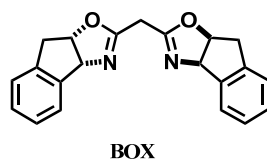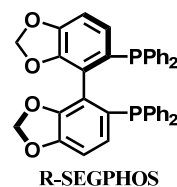

**Table 4.** Investigation of additive effect<sup>a</sup>

| entry          | additive                            | reaction time (h) | yield (%) <sup>b</sup> | ee (%) <sup>c</sup> |
|----------------|-------------------------------------|-------------------|------------------------|---------------------|
| 1              | –                                   | 30                | 76                     | 80                  |
| 2              | PhOH                                | 35                | 47                     | 67                  |
| 3              | HOCH(CF <sub>3</sub> ) <sub>2</sub> | 35                | 59                     | 57                  |
| 4              | CF <sub>3</sub> CH <sub>2</sub> OH  | 54                | 20                     | 79                  |
| 5              | PhCOOH                              | 44                | 30                     | 13                  |
| 6 <sup>d</sup> | Me <sub>3</sub> SiBr                | 10                | 11                     | 79                  |

<sup>a</sup> Reactions were carried out with 0.75 mmol of ethyl glyoxylate and 0.50 mmol of enolsilane in the presence of 150 mg powdered activated 4Å molecular sieves in 2.0 mL of solvent.

<sup>b</sup> Isolated yield.

<sup>c</sup> *ee* values were determined by chiral stationary phase HPLC analysis. The absolute configuration of the major products was *R*, assigned by comparing the optical rotation with the literature.

<sup>d</sup> TLC showed that within 10 h of reaction, **7** was all consumed in which the majority was hydrolyzed to acetophenone.

**Table 5.** Investigation of steric effect of silyl group<sup>a</sup>

| entry | R <sub>3</sub>                  | reaction time (h) | yield (%) <sup>b</sup> | ee (%) <sup>c</sup> |
|-------|---------------------------------|-------------------|------------------------|---------------------|
| 1     | Me <sub>3</sub>                 | 30                | 76                     | 80                  |
| 2     | Me <sub>2</sub> <sup>t</sup> Bu | 59                | 88                     | 83                  |
| 3     | <sup>i</sup> Pr <sub>3</sub>    | 46                | 76                     | 85                  |

<sup>a</sup> Reactions were carried out with 0.75 mmol of ethyl glyoxylate and 0.50 mmol of enolsilane in the presence of 150 mg powdered activated 4Å molecular sieves in 2.0 mL of solvent.

<sup>b</sup> Isolated yield.

<sup>c</sup> *ee* values were determined by chiral stationary phase HPLC analysis. The absolute configuration of the major products was *R*, assigned by comparing the optical rotation with the literature.

**Table 6.** Investigation of counterion effect of In(III)-pybox complex<sup>a</sup>

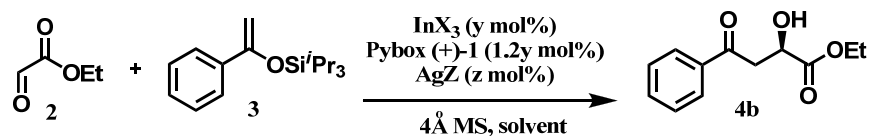

| entry | InX <sub>3</sub> (mol%) | AgZ (mol %)             | T (°C) | solvent | reaction time (h) | yield (%) <sup>b</sup> | ee (%) <sup>c</sup> |
|-------|-------------------------|-------------------------|--------|---------|-------------------|------------------------|---------------------|
| 1     | InCl <sub>3</sub> , 10  | AgSbF <sub>6</sub> , 20 | -40    | MeCN    | 20                | 70                     | 85                  |
| 2     | InCl <sub>3</sub> , 10  | AgSbF <sub>6</sub> , 20 | -60    | EtCN    | 60                | 63                     | 87                  |
| 3     | InCl <sub>3</sub> , 10  | AgSbF <sub>6</sub> , 20 | -78    | EtCN    | 60                | 54                     | 88                  |
| 4     | InCl <sub>3</sub> , 5   | AgSbF <sub>6</sub> , 10 | -78    | EtCN    | 63                | 37                     | 86                  |
| 5     | InBr <sub>3</sub> , 10  | AgSbF <sub>6</sub> , 20 | -78    | EtCN    | 48                | 53                     | 89                  |
| 6     | InBr <sub>3</sub> , 5   | AgSbF <sub>6</sub> , 15 | -20    | MeCN    | 19                | 48                     | 84                  |
| 7     | InBr <sub>3</sub> , 5   | AgSbF <sub>6</sub> , 10 | -20    | MeCN    | 19                | 71                     | 85                  |
| 8     | InBr <sub>3</sub> , 5   | AgSbF <sub>6</sub> , 5  | -20    | MeCN    | 19                | 89                     | 87                  |
| 9     | InBr <sub>3</sub> , 5   | AgSbF <sub>6</sub> , 5  | -40    | MeCN    | 36                | 91                     | 89                  |
| 10    | InBr <sub>3</sub> , 5   | AgSbF <sub>6</sub> , 5  | 25     | MeCN    | 2                 | 97                     | 77                  |
| 11    | InBr <sub>3</sub> , 5   | AgPF <sub>6</sub> , 5   | 25     | MeCN    | 4                 | 95                     | 77                  |
| 12    | InBr <sub>3</sub> , 5   | AgBF <sub>4</sub> , 5   | 25     | MeCN    | 2                 | 96                     | 72                  |
| 13    | InBr <sub>3</sub> , 5   | AgClO <sub>4</sub> , 5  | 25     | MeCN    | 4                 | 95                     | 73                  |
| 14    | InBr <sub>3</sub> , 5   | AgOAc, 5                | 25     | MeCN    | 24                | -                      | nd                  |

<sup>a</sup> Reactions were carried out with 0.75 mmol of ethyl glyoxylate and 0.50 mmol of enolsilane in the presence of 150 mg powdered activated 4 Å molecular sieves in 2.0 mL of solvent.

<sup>b</sup> Isolated yield.

<sup>c</sup> *ee* values were determined by chiral stationary phase HPLC analysis. The absolute configuration of the major products was *R*, assigned by comparing the optical rotation with the literature.

Table 7. The effect of 4 Å molecular sieves<sup>a</sup>

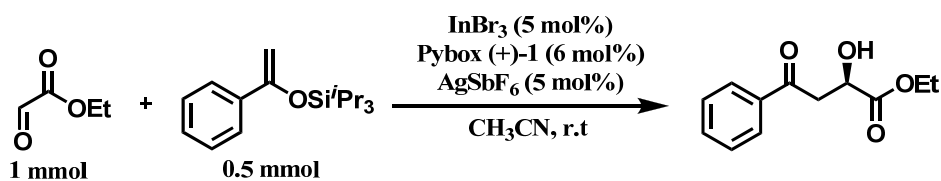

| entry          | 4 Å MS | $\text{H}_2\text{O}$ | yield (%) <sup>b</sup> | ee (%) <sup>c</sup> |
|----------------|--------|----------------------|------------------------|---------------------|
| 1              | 150 mg | –                    | 97                     | 77                  |
| 2              | –      | –                    | 96                     | 77                  |
| 3 <sup>d</sup> | –      | 50 $\mu\text{L}$     | 75                     | 76                  |

<sup>a</sup> Reactions were carried out with 1.0 mmol of ethyl glyoxylate and 0.50 mmol of enolsilane in the presence of 150 mg powdered activated 4 Å molecular sieves in 2.0 mL of solvent.

<sup>b</sup> Isolated yield.

<sup>c</sup> ee values were determined by chiral stationary phase HPLC analysis.

<sup>d</sup> 20% of enolsilane was hydrolyzed.



### General procedure for the preparation of silyl enol ethers

To in a 50 mL round-bottom flask equipped with a stirring bar and filled with  $\text{CH}_2\text{Cl}_2$  (20 mL), acetophenone (5.0 mmol) and triethylamine (1.3 mL, 9.0 mmol) were added. The solution was stirred at room temperature for 15 mins before cooling down to  $0^\circ\text{C}$ . Triisopropylsilyl trifluoromethanesulfonate (1.7 mL, 6.0 mmol) was added by a syringe slowly over 2 min at  $0^\circ\text{C}$ . The resulting mixture was stirred under  $\text{N}_2$  atmosphere at  $0^\circ\text{C}$  for 30 min. The reaction was quenched by saturated  $\text{NaHCO}_3$  solution (20 mL) and diluted by cooled  $\text{CH}_2\text{Cl}_2$  (10 mL). The organic layer was washed with cooled saturated  $\text{NaHCO}_3$  solution twice, dried over  $\text{MgSO}_4$ , filtered, and concentrated under reduced pressure. The crude product was purified by flash column chromatography on  $\text{Et}_3\text{N}$ -treated silica gel eluting with hexane to afford silyl enol ethers **3b-r** as colourless oils.

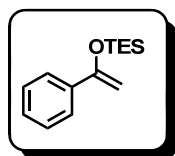

#### triethyl(1-phenylvinyloxy)silane (**3b**)

This compound was prepared by the General Procedure described above and was obtained as colourless oil in 62% yield (0.726g);  $R_f = 0.94$  (ethyl acetate/hexane = 1/4);  $^1\text{H NMR}$  (300 MHz,  $\text{CDCl}_3$ ):  $\delta$  7.63–7.59 (m, 2H), 7.35 – 7.27(m, 3H), 4.87 (d,  $J = 1.7$  Hz, 1H), 4.42 (d,  $J = 1.7$  Hz, 1H), 1.01 (t,  $J = 7.8$  Hz, 9H), 0.76 (q,  $J = 7.8$  Hz, 6H) ppm;  $^{13}\text{C NMR}$  (75 MHz,  $\text{CDCl}_3$ ):  $\delta$  155.9, 137.7, 128.2, 128.1, 125.2, 90.4, 6.7, 5.0 ppm; FTIR (KBr, neat):  $\nu$  2955, 2876, 1614, 1458, 1414, 1317, 1117, 1009, 737  $\text{cm}^{-1}$ ; HRMS (ESI,  $m/z$ ) calcd for  $\text{C}_{14}\text{H}_{22}\text{OSiH}^+$ : 235.1518, found: 235.1517.

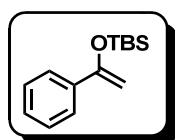

#### tert-butyldimethyl(1-phenylvinyloxy)silane (**3c**)

This compound was prepared by the General Procedure described above and was obtained as colourless oil in 64% yield (0.752g);  $R_f = 0.92$  (ethyl acetate/hexane = 1/4);  $^1\text{H NMR}$  (300 MHz,  $\text{CDCl}_3$ ):  $\delta$  7.60–7.56 (m, 2H), 7.31 – 7.23 (m, 3H), 4.85 (d,  $J = 1.5$  Hz, 1H), 4.39 (d,  $J = 1.6$  Hz, 1H), 0.98 (s, 9H), 0.18 (s, 6H) ppm;  $^{13}\text{C NMR}$  (75 MHz,  $\text{CDCl}_3$ ):  $\delta$  156.0, 137.9, 128.2, 128.1, 125.3, 90.9, 25.9, 18.4, -4.6 ppm; FTIR (KBr, neat):  $\nu$  2957, 2930, 2859, 1614, 1472, 1315, 1256, 1117, 1013, 833, 772, 700  $\text{cm}^{-1}$ ; HRMS (ESI,  $m/z$ ) calcd for  $\text{C}_{14}\text{H}_{22}\text{OSiH}^+$ : 235.1518, found: 235.1514.

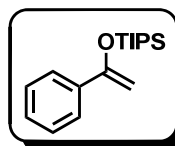

#### triisopropyl(1-phenylvinyloxy)silane (**3d**)

This compound was prepared by the General Procedure described above and was obtained as colourless oil in 83% yield (1.146g);  $R_f = 0.90$  (ethyl acetate/hexane = 1/4);  $^1\text{H NMR}$  (300 MHz,  $\text{CDCl}_3$ ):  $\delta$  7.69 – 7.59 (m, 2H), 7.37 – 7.21 (m, 3H), 4.85 (d,  $J = 1.8$  Hz, 1H), 4.41 (d,  $J = 1.7$  Hz, 1H), 1.38 – 1.21 (m, 3H), 1.13 (d,  $J = 7.1$  Hz, 18H) ppm;  $^{13}\text{C NMR}$  (75 MHz,  $\text{CDCl}_3$ ):  $\delta$  156.2, 138.0, 128.11, 128.05, 125.3, 90.0, 18.1, 12.8 ppm; FTIR (KBr, neat):  $\nu$  2945, 2866, 1612, 1464, 1385, 1317, 1117, 1015, 883, 772, 687  $\text{cm}^{-1}$ ; HRMS (ESI,  $m/z$ ) calcd for  $\text{C}_{17}\text{H}_{28}\text{OSiH}^+$ : 277.1988, found: 277.1990.

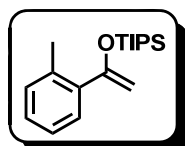

#### triisopropyl(1-o-tolylvinyl)oxy silane (3e)

This compound was prepared by the General Procedure described above and was obtained as colourless oil in 77% yield (1.117g);  $R_f = 0.89$  (ethyl acetate/hexane = 1/4);  $^1\text{H NMR}$  (300 MHz,  $\text{CDCl}_3$ ):  $\delta$  7.34 (d,  $J = 7.4$  Hz, 1H), 7.22 – 7.07 (m, 3H), 4.54 (d,  $J = 0.9$  Hz, 1H), 4.35 (d,  $J = 0.9$  Hz, 1H), 2.42 (s, 3H), 1.31 – 1.13 (m, 3H), 1.08 (d,  $J = 6.9$  Hz, 18H) ppm;  $^{13}\text{C NMR}$  (75 MHz,  $\text{CDCl}_3$ )  $\delta$  158.3, 139.5, 135.8, 130.3, 128.6, 127.8, 125.3, 94.3, 20.6, 18.1, 12.7 ppm; FTIR (KBr, neat):  $\nu$  2945, 2866, 1622, 1464, 1383, 1312, 1132, 1094, 1016, 883, 729, 687  $\text{cm}^{-1}$ ; HRMS (ESI,  $m/z$ ) calcd for  $\text{C}_{18}\text{H}_{30}\text{OSiH}^+$ : 291.2144, found: 291.2140.

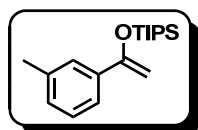

#### triisopropyl(1-m-tolylvinyl)oxy silane (3f)

This compound was prepared by the General Procedure described above and was obtained as colourless oil in 79% yield (1.146g);  $R_f = 0.91$  (ethyl acetate/hexane = 1/4);  $^1\text{H NMR}$  (300 MHz,  $\text{CDCl}_3$ ):  $\delta$  7.45 (d,  $J = 7.5$  Hz, 2H), 7.25 – 7.16 (m, 1H), 7.08 (d,  $J = 7.3$  Hz, 1H), 4.83 (d,  $J = 1.4$  Hz, 1H), 4.39 (d,  $J = 1.5$  Hz, 1H), 2.34 (s, 3H), 1.37 – 1.21 (m, 3H), 1.13 (d,  $J = 7.1$  Hz, 18H) ppm;  $^{13}\text{C NMR}$  (75 MHz,  $\text{CDCl}_3$ ):  $\delta$  156.3, 138.0, 137.5, 128.9, 128.0, 126.1, 122.6, 89.9, 21.6, 18.2, 12.9 ppm; FTIR (KBr, neat):  $\nu$  2943, 2866, 1601, 1582, 1464, 1383, 1310, 1207, 1016, 883, 789, 685  $\text{cm}^{-1}$ ; HRMS (ESI,  $m/z$ ) calcd for  $\text{C}_{18}\text{H}_{30}\text{OSiH}^+$ : 291.2144, found: 291.2140.

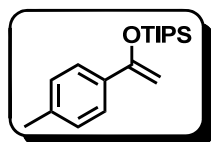

#### triisopropyl(1-p-tolylvinyl)oxy silane (3g)

This compound was prepared by the General Procedure described above and was obtained as colourless oil in 80% yield (1.161g);  $R_f = 0.90$  (ethyl acetate/hexane = 1/4);  $^1\text{H NMR}$  (300 MHz,  $\text{CDCl}_3$ ):  $\delta$  7.54 (d,  $J = 8.2$  Hz, 2H), 7.12 (d,  $J = 8.0$  Hz, 2H), 4.80 (d,  $J = 1.6$  Hz, 1H), 4.36 (d,  $J = 1.6$  Hz, 1H), 2.36 (s, 3H), 1.38 – 1.20 (m, 3H), 1.12 (d,  $J = 7.0$  Hz, 18H) ppm;  $^{13}\text{C NMR}$  (75 MHz,  $\text{CDCl}_3$ )  $\delta$  156.3, 137.9, 135.3, 128.8, 125.3, 89.2, 21.2,

18.2, 12.9 ppm; FTIR (KBr, neat):  $\nu$  2943, 2866, 1611, 1510, 1464, 1383, 1315, 1113, 1016, 883, 762, 681  $\text{cm}^{-1}$ ;  
HRMS (ESI,  $m/z$ ) calcd for  $\text{C}_{18}\text{H}_{30}\text{OSiH}^+$ : 291.2144, found: 291.2146.

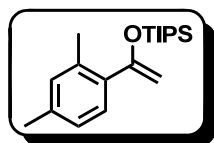

**(1-(2,4-dimethylphenyl)vinyl)oxytriisopropylsilane (3h)**

This compound was prepared by the General Procedure described above and was obtained as yellow oil in 75% yield (1.145g);  $R_f = 0.92$  (ethyl acetate/hexane = 1/4);  $^1\text{H}$  NMR (300 MHz,  $\text{CDCl}_3$ ):  $\delta$  7.24 (d,  $J = 7.6$  Hz, 1H), 6.96 (s, 1H), 6.93 (d,  $J = 7.6$  Hz, 1H), 4.51 (d,  $J = 0.7$  Hz, 1H), 4.32 (d,  $J = 0.7$  Hz, 1H), 2.39 (s, 3H), 2.30 (s, 3H), 1.23 – 1.16 (m, 3H), 1.08 (d,  $J = 6.8$  Hz, 18H) ppm;  $^{13}\text{C}$  NMR (75 MHz,  $\text{CDCl}_3$ ):  $\delta$  158.2, 137.4, 136.7, 135.6, 131.1, 128.6, 125.9, 94.0, 21.1, 20.5, 18.1, 12.7 ppm; FTIR (KBr, neat):  $\nu$  2943, 2866, 1614, 1464, 1383, 1308, 1090, 1016, 883, 824, 683  $\text{cm}^{-1}$ ; HRMS (ESI,  $m/z$ ) calcd for  $\text{C}_{19}\text{H}_{32}\text{OSiH}^+$ : 305.2301, found: 305.2298.

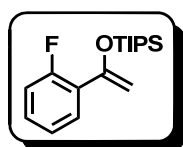

**(1-(2-fluorophenyl)vinyl)oxytriisopropylsilane (3i)**

This compound was prepared by the General Procedure described above and was obtained as colourless oil in 82% yield (1.206g);  $R_f = 0.93$  (ethyl acetate/hexane = 1/4);  $^1\text{H}$  NMR (300 MHz,  $\text{CDCl}_3$ ):  $\delta$  7.69 – 7.63 (m, 1H), 7.27 – 6.99 (m, 3H), 4.99 – 4.94 (m, 1H), 4.70 – 4.67 (m, 1H), 1.34 – 1.21 (m, 3H), 1.12 (d,  $J = 7.0$  Hz, 18H) ppm;  $^{13}\text{C}$  NMR (75 MHz,  $\text{CDCl}_3$ ):  $\delta$  160.01 (d,  $J = 250.9$  Hz), 150.72 (d,  $J = 4.0$  Hz), 129.2 (d,  $J = 8.7$  Hz), 128.8 (d,  $J = 2.7$  Hz), 126.0 (d,  $J = 11.1$  Hz), 123.7 (d,  $J = 3.7$  Hz), 116.0 (d,  $J = 23.6$  Hz), 96.0 (d,  $J = 11.4$  Hz), 18.1, 12.8 ppm; FTIR (KBr, neat):  $\nu$  2945, 2868, 1612, 1489, 1385, 1312, 1090, 1018, 883, 760, 685  $\text{cm}^{-1}$ ; HRMS (ESI,  $m/z$ ) calcd for  $\text{C}_{17}\text{H}_{27}\text{FOSiH}^+$ : 295.1893, found: 295.1884.

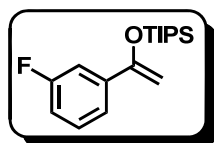

**(1-(3-fluorophenyl)vinyl)oxytriisopropylsilane (3j)**

This compound was prepared by the General Procedure described above and was obtained as colourless oil in 72% yield (1.059g);  $R_f = 0.90$  (ethyl acetate/hexane = 1/4);  $^1\text{H}$  NMR (300 MHz,  $\text{CDCl}_3$ ):  $\delta$  7.44 – 7.22 (m, 3H), 7.01 – 6.92 (m, 1H), 4.86 (d,  $J = 2.0$  Hz, 1H), 4.45 (d,  $J = 2.0$  Hz, 1H), 1.36 – 1.22 (m, 3H), 1.13 (d,  $J = 7.0$  Hz, 18H) ppm;  $^{13}\text{C}$  NMR (75 MHz,  $\text{CDCl}_3$ )  $\delta$  162.9 (d,  $J = 244.4$  Hz), 155.0 (d,  $J = 2.6$  Hz), 140.4 (d,  $J = 7.5$  Hz), 129.4 (d,  $J = 8.2$  Hz), 120.9 (d,  $J = 2.8$  Hz), 114.8 (d,  $J = 21.4$  Hz), 112.3 (d,  $J = 23.0$  Hz), 90.8, 18.1, 12.8 ppm;

FTIR (KBr, neat):  $\nu$  2945, 2868, 1614, 1582, 1464, 1385, 1315, 1308, 1207, 1016, 883, 787, 685  $\text{cm}^{-1}$ ; HRMS (ESI,  $m/z$ ) calcd for  $\text{C}_{17}\text{H}_{27}\text{FOSiH}^+$ : 295.1893, found: 295.1910.

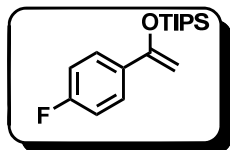

**(1-(4-fluorophenyl)vinyl)oxytriisopropylsilane (3k)**

This compound was prepared by the General Procedure described above and was obtained as colourless oil in 74% yield (1.089g);  $R_f$  = 0.92 (ethyl acetate/hexane = 1/4);  $^1\text{H}$  NMR (300 MHz,  $\text{CDCl}_3$ ):  $\delta$  7.68 – 7.49 (m, 2H), 7.04 – 6.93 (m, 2H), 4.77 (d,  $J$  = 1.9 Hz, 1H), 4.39 (d,  $J$  = 1.9 Hz, 1H), 1.36 – 1.21 (m, 3H), 1.12 (d,  $J$  = 7.1 Hz, 18H) ppm;  $^{13}\text{C}$  NMR (75 MHz,  $\text{CDCl}_3$ ):  $\delta$  162.8 (d,  $J$  = 247.1 Hz), 155.4, 134.1 (d,  $J$  = 3.2 Hz), 127.1 (d,  $J$  = 8.1 Hz), 114.9 (d,  $J$  = 21.5 Hz), 89.6 (d,  $J$  = 1.4 Hz), 18.1, 12.8 ppm; FTIR (KBr, neat):  $\nu$  2945, 2868, 1607, 1508, 1464, 1385, 1314, 1115, 1015, 841, 762, 681  $\text{cm}^{-1}$ ; HRMS (ESI,  $m/z$ ) calcd for  $\text{C}_{17}\text{H}_{27}\text{FOSiH}^+$ : 295.1893, found: 295.1937.

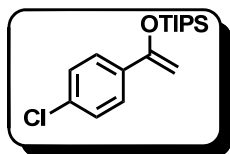

**(1-(4-chlorophenyl)vinyl)oxytriisopropylsilane (3l)**

This compound was prepared by the General Procedure described above and was obtained as colourless oil in 71% yield (1.101g);  $R_f$  = 0.92 (ethyl acetate/hexane = 1/4);  $^1\text{H}$  NMR (300 MHz,  $\text{CDCl}_3$ ):  $\delta$  7.56 (d,  $J$  = 8.6 Hz, 2H), 7.27 (d,  $J$  = 8.6 Hz, 2H), 4.82 (d,  $J$  = 2.0 Hz, 1H), 4.42 (d,  $J$  = 2.0 Hz, 1H), 1.37 – 1.20 (m, 3H), 1.12 (d,  $J$  = 7.0 Hz, 18H) ppm;  $^{13}\text{C}$  NMR (75 MHz,  $\text{CDCl}_3$ ):  $\delta$  155.2, 136.5, 133.9, 128.2, 126.6, 90.4, 18.1, 12.8 ppm; FTIR (KBr, neat):  $\nu$  2945, 2866, 1612, 1489, 1396, 1314, 1117, 1013, 835, 741, 683  $\text{cm}^{-1}$ ; HRMS (ESI,  $m/z$ ) calcd for  $\text{C}_{17}\text{H}_{27}\text{ClOSiH}^+$ : 311.1598, found: 311.1608.

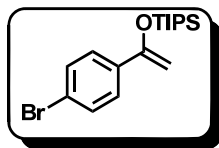

**(1-(4-bromophenyl)vinyl)oxytriisopropylsilane (3m)**

This compound was prepared by the General Procedure described above and was obtained as colourless oil in 78% yield (1.369g);  $R_f$  = 0.88 (ethyl acetate/hexane = 1/4);  $^1\text{H}$  NMR (300 MHz,  $\text{CDCl}_3$ ):  $\delta$  7.52 – 7.48 (m, 2H), 7.45 – 7.42 (m, 2H), 4.83 (d,  $J$  = 2.0 Hz, 1H), 4.42 (d,  $J$  = 2.0 Hz, 1H), 1.37 – 1.21 (m, 3H), 1.12 (d,  $J$  = 7.1 Hz, 18H) ppm;  $^{13}\text{C}$  NMR (75 MHz,  $\text{CDCl}_3$ ):  $\delta$  155.2, 136.9, 131.2, 126.9, 122.2, 90.4, 18.1, 12.8 ppm; FTIR (KBr, neat):  $\nu$  2945, 2866, 1611, 1485, 1391, 1314, 1115, 1009, 831, 735, 657  $\text{cm}^{-1}$ ; HRMS (ESI,  $m/z$ ) calcd for  $\text{C}_{17}\text{H}_{27}\text{BrOSiH}^+$ : 355.1093, found: 355.1111.

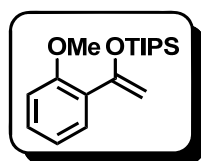

### triisopropyl(1-(2-methoxyphenyl)vinyl)oxy)silane (3n)

This compound was prepared by the General Procedure described above and was obtained as colourless oil in 71% yield (1.087g);  $R_f = 0.89$  (ethyl acetate/hexane = 1/4);  $^1\text{H NMR}$  (300 MHz,  $\text{CDCl}_3$ ):  $\delta$  7.62 – 7.59 (m, 1H), 7.26 – 7.20 (m, 1H), 6.95 – 6.86 (m, 2H), 5.01 (s, 1H), 4.65 (s, 1H), 3.84 (s, 3H), 1.31 – 1.17 (m, 3H), 1.10 (d,  $J = 6.9$  Hz, 18H) ppm;  $^{13}\text{C NMR}$  (75 MHz,  $\text{CDCl}_3$ ):  $\delta$  157.0, 153.2, 129.0, 128.9, 127.3, 120.1, 111.1, 95.5, 55.3, 18.1, 12.8 ppm; FTIR (KBr, neat):  $\nu$  2943, 2866, 1612, 1489, 1464, 1383, 1277, 1018, 883, 752, 685  $\text{cm}^{-1}$ ; HRMS (ESI,  $m/z$ ) calcd for  $\text{C}_{18}\text{H}_{30}\text{O}_2\text{SiH}^+$ : 307.2093, found: 307.2097.

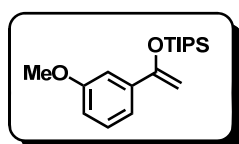

### triisopropyl(1-(3-methoxyphenyl)vinyl)oxy)silane (3o)

This compound was prepared by the General Procedure described above and was obtained as colourless oil in 70% yield (1.072g);  $R_f = 0.91$  (ethyl acetate/hexane = 1/4);  $^1\text{H NMR}$  (300 MHz,  $\text{CDCl}_3$ ):  $\delta$  7.25 – 7.16 (m, 3H), 6.85 – 6.82 (m, 1H), 4.85 (d,  $J = 1.2$  Hz, 1H), 4.42 (d,  $J = 1.2$  Hz, 1H), 3.80 (s, 3H), 1.37 – 1.23 (m, 3H), 1.13 (d,  $J = 7.0$  Hz, 18H) ppm;  $^{13}\text{C NMR}$  (75 MHz,  $\text{CDCl}_3$ ):  $\delta$  159.5, 155.9, 139.5, 129.0, 117.9, 113.9, 110.8, 90.2, 55.1, 18.1, 12.8 ppm; FTIR (KBr, neat):  $\nu$  2945, 2866, 1578, 1464, 1383, 1310, 1238, 1016, 883, 685  $\text{cm}^{-1}$ ; HRMS (ESI,  $m/z$ ) calcd for  $\text{C}_{18}\text{H}_{30}\text{O}_2\text{SiH}^+$ : 307.2093, found: 307.2095.

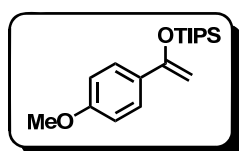

### triisopropyl(1-(4-methoxyphenyl)vinyl)oxy)silane (3p)

This compound was prepared by the General Procedure described above and was obtained as colourless oil in 74% yield (1.133g);  $R_f = 0.89$  (ethyl acetate/hexane = 1/4);  $^1\text{H NMR}$  (300 MHz,  $\text{CDCl}_3$ ):  $\delta$  7.54 (d,  $J = 8.4$  Hz, 2H), 7.11 (d,  $J = 8.4$  Hz, 2H), 4.80 (d,  $J = 1.6$  Hz, 1H), 4.36 (d,  $J = 1.6$  Hz, 1H), 2.34 (s, 3H), 1.45 – 1.19 (m, 3H), 1.12 (d,  $J = 7.2$  Hz, 18H) ppm;  $^{13}\text{C NMR}$  (75 MHz,  $\text{CDCl}_3$ ):  $\delta$  156.3, 137.9, 135.2, 128.8, 125.3, 89.2, 21.2, 18.2, 12.9 ppm; FTIR (KBr, neat):  $\nu$  2943, 2866, 1611, 1510, 1464, 1383, 1315, 1113, 1016, 883, 824, 762, 681  $\text{cm}^{-1}$ ; HRMS (ESI,  $m/z$ ) calcd for  $\text{C}_{18}\text{H}_{30}\text{O}_2\text{SiH}^+$ : 307.2093, found: 307.2094.

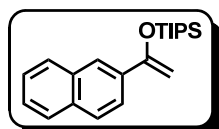

#### triisopropyl(1-(naphthalen-2-yl)vinyl)oxy)silane – (4q)

This compound was prepared by the General Procedure described above and was obtained as yellow oil in 81% yield (1.321g);  $R_f = 0.93$  (ethyl acetate/hexane = 1/4);  $^1\text{H NMR}$  (300 MHz,  $\text{CDCl}_3$ ):  $\delta$  8.14 (s, 1H), 7.85 – 7.71 (m, 4H), 7.49 – 7.37 (m, 2H), 5.00 (d,  $J = 1.5$  Hz, 1H), 4.52 (d,  $J = 1.5$  Hz, 1H), 1.42 – 1.26 (m, 3H), 1.16 (d,  $J = 7.2$  Hz, 18H) ppm;  $^{13}\text{C NMR}$  (75 MHz,  $\text{CDCl}_3$ ):  $\delta$  156.2, 135.3, 133.34, 133.30, 128.6, 127.7, 127.6, 126.14, 126.11, 124.5, 123.6, 90.9, 18.2, 12.9 ppm; FTIR (KBr, neat):  $\nu$  3059, 2943, 2866, 1611, 1464, 1385, 1364, 1310, 1094, 1015, 881, 748, 677  $\text{cm}^{-1}$ ; HRMS (ESI,  $m/z$ ) calcd for  $\text{C}_{21}\text{H}_{30}\text{OSiH}^+$ : 327.2144, found: 327.2143.

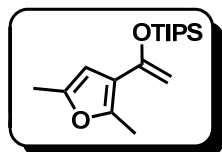

#### (1-(2,5-dimethylfuran-3-yl)vinyl)triisopropylsilane (3r)

This compound was prepared by the General Procedure described above and was obtained as yellow oil in 63% yield (0.927g);  $R_f = 0.9$  (ethyl acetate/hexane = 1/4);  $^1\text{H NMR}$  (300 MHz,  $\text{CDCl}_3$ ):  $\delta$  5.97 (s, 1H), 4.32 (d,  $J = 1.3$  Hz, 1H), 4.27 (d,  $J = 1.3$  Hz, 1H), 2.38 (s, 3H), 2.21 (s, 3H), 1.33 – 1.19 (m, 3H), 1.12 (d,  $J = 6.8$  Hz, 18H) ppm;  $^{13}\text{C NMR}$  (75 MHz,  $\text{CDCl}_3$ ):  $\delta$  152.2, 148.9, 147.2, 119.7, 105.9, 90.0, 18.0, 13.6, 13.3, 12.9 ppm; FTIR (KBr, neat):  $\nu$  2943, 2866, 1651, 1570, 1464, 1412, 1383, 1290, 1215, 1080, 1013, 883, 799, 681  $\text{cm}^{-1}$ ; HRMS (ESI,  $m/z$ ) calcd for  $\text{C}_{17}\text{H}_{30}\text{O}_2\text{SiH}^+$ : 295.2093, found: 295.2104.

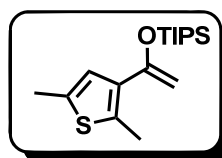

#### (1-(2,5-dimethylthiophen-3-yl)vinyl)triisopropylsilane (3s)

This compound was prepared by the General Procedure described above and was obtained as yellow oil in 73% yield (1.132g);  $R_f = 0.89$  (ethyl acetate/hexane = 1/4);  $^1\text{H NMR}$  (300 MHz,  $\text{CDCl}_3$ ):  $\delta$  6.70 (s, 1H), 4.43 (d,  $J = 1.1$  Hz, 1H), 4.33 (d,  $J = 1.0$  Hz, 1H), 2.45 (s, 3H), 2.37 (s, 3H), 1.30 – 1.16 (m, 3H), 1.10 (d,  $J = 6.8$  Hz, 18H) ppm;  $^{13}\text{C NMR}$  (75 MHz,  $\text{CDCl}_3$ ):  $\delta$  153.4, 135.9, 134.3, 133.5, 126.1, 92.6, 18.1, 15.0, 14.9, 12.8 ppm; FTIR (KBr, neat):  $\nu$  2943, 2866, 1614, 1464, 1385, 1337, 1269, 1015, 883, 752, 682  $\text{cm}^{-1}$ ; HRMS (ESI,  $m/z$ ) calcd for  $\text{C}_{17}\text{H}_{30}\text{OSSiH}^+$ : 311.1865, found: 311.1873.

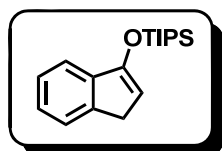

#### (1H-inden-3-yloxy)triisopropylsilane (5)

This compound was prepared by the General Procedure described above and was obtained as yellow oil in 85% yield (1.229g);  $R_f = 0.90$  (ethyl acetate/hexane = 1/4);  $^1\text{H NMR}$  (300 MHz,  $\text{CDCl}_3$ ):  $\delta$  7.43 (d,  $J = 7.5$  Hz, 1H), 7.36 (d,  $J = 7.3$  Hz, 1H), 7.31 – 7.26 (m, 1H), 7.21 – 7.16 (m, 1H), 5.40 (t,  $J = 2.4$  Hz, 1H), 3.26 (d,  $J = 2.1$  Hz,

2H), 1.36 – 1.27 (m, 3H), 1.14 (d,  $J = 7.2$  Hz, 18H) ppm;  $^{13}\text{C}$  NMR (75 MHz,  $\text{CDCl}_3$ ):  $\delta$  154.00, 142.8, 142.1, 126.1, 125.1, 123.8, 118.3, 105.2, 33.9, 18.1, 12.7 ppm; FTIR (KBr, neat):  $\nu$  3072, 2943, 2866, 1603, 1576, 1464, 1362, 1308, 1248, 1180, 1126, 881, 850, 752  $\text{cm}^{-1}$ ; HRMS (ESI,  $m/z$ )

### General procedure for In(III)-pybox complex catalyzed asymmetric Mukaiyama Aldol reactions of glyoxylates and enolsilanes derived from aryl ketones:

In a 5 mL round-bottom flask containing  $\text{CH}_3\text{CN}$  (1.5 ml) with a stirring bar,  $\text{InBr}_3$  (8.9 mg, 0.025 mmol), pybox-1 (11.8 mg, 0.03 mmol) and 4Å molecular sieves (150.0 mg) were added and stirred at room temperature for 30 minutes. To the above mixture, silver hexafluoroantimonate ( $\text{AgSbF}_6$ ) (8.6 mg, 0.025 mmol) was added in one portion and stirred for another 30 minutes. To the pre-prepared catalyst in  $\text{CH}_3\text{CN}$ , the glyoxylate ester (1.0 mmol, 2 eq.) was added using a syringe sequentially under  $\text{N}_2$  atmosphere. The resulting mixture was cooled to  $-20^\circ\text{C}$  before enolsilane (0.5 mmol, 1 eq.) was added using syringe under  $\text{N}_2$  atmosphere. It was stirred until the enolsilanes had undergone complete reaction using TLC to monitor its progress. The reaction was quenched by saturated  $\text{NaHCO}_3$  solution (5 mL). The solution was extracted by ethyl acetate twice. The combined organic layer was washed with brine and dried over  $\text{MgSO}_4$ , filtered, and concentrated under reduced pressure. The crude product was loaded directly onto a silica gel column and purified by flash column chromatography to obtain the enantio-enriched  $\beta$ -hydroxy ketones.

### Characterization data for enantioenriched $\beta$ -hydroxy ketones

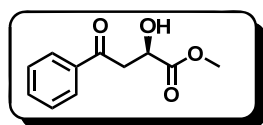

#### (*R*)-methyl 2-hydroxy-4-oxo-4-phenylbutanoate (4a)

This compound was prepared by the General Procedure described above and was obtained as colourless oil in 62% yield (0.064g, 43% *ee*):  $R_f = 0.24$  (ethyl acetate : hexane = 1/4),  $[\alpha]_{\text{D}}^{21} = -3.8$  ( $c = 1.72$ ,  $\text{CHCl}_3$ , for 43% *ee*);  $^1\text{H}$  NMR (300 MHz,  $\text{CDCl}_3$ ):  $\delta$  7.97 – 7.94 (m, 2H), 7.63 – 7.58 (m, 1H), 7.51 – 7.46 (m, 2H), 4.70 – 4.67 (m, 1H), 3.82 (s, 3H), 3.57 (dd,  $J = 17.6, 3.9$  Hz, 1H), 3.47 (dd,  $J = 17.6, 5.9$  Hz, 1H) ppm;  $^{13}\text{C}$  NMR (75 MHz,  $\text{CDCl}_3$ ):  $\delta$  197.6, 174.2, 136.3, 133.7, 128.7, 128.2, 67.2, 52.7, 42.2 ppm; FTIR (KBr, neat):  $\nu$  3503, 2956, 1744, 1685, 1598, 1581, 1450, 1369, 1220, 1108, 1041  $\text{cm}^{-1}$ ; HRMS (ESI,  $m/z$ ) calcd for  $\text{C}_{11}\text{H}_{12}\text{O}_4\text{H}^+$ : 209.0814, found: 209.0811; The enantiometric excess was determined by HPLC analysis employing Daicel Chiracel AS-H column (hexane/*i*-PrOH = 85:15, 1.0 mL/min):  $t_1 = 13.2$  min (minor),  $t_2 = 15.6$  min (major).

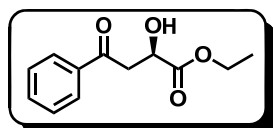

#### (*R*)-ethyl 2-hydroxy-4-oxo-4-phenylbutanoate (4b)

This compound was prepared by the General Procedure described above and was obtained as colourless oil in 88% yield (0.098g, 89% *ee*):  $R_f = 0.26$  (ethyl acetate : hexane = 1/4),  $[\alpha]_D^{22} = -4.7$  ( $c = 1.86$ ,  $\text{CHCl}_3$ , for 89% *ee*);  $^1\text{H NMR}$  (300 MHz,  $\text{CDCl}_3$ ):  $\delta$  7.97 – 7.94 (m, 2H), 7.61 – 7.56 (m, 1H), 7.50 – 7.44 (m, 2H), 4.69 – 4.65 (m, 1H), 4.27 (q,  $J = 7.1$  Hz, 2H), 3.55 (dd,  $J = 17.5, 4.0$  Hz, 1H), 3.46 (dd,  $J = 17.5, 5.9$  Hz, 1H), 3.43 (bs, 1H), 1.28 (t,  $J = 7.1$  Hz, 3H) ppm;  $^{13}\text{C NMR}$  (75 MHz,  $\text{CDCl}_3$ ):  $\delta$  197.5, 173.8, 136.4, 133.6, 128.7, 128.2, 67.2, 61.9, 42.2, 14.1 ppm; FTIR (KBr, neat):  $\nu$  3485, 2982, 2934, 1736, 1686, 1597, 1580, 1449, 1368, 1273, 1215, 1101  $\text{cm}^{-1}$ ; HRMS (ESI,  $m/z$ ) calcd for  $\text{C}_{12}\text{H}_{14}\text{O}_4\text{H}^+$ : 223.0970, found: 223.0969; The enantiometric excess was determined by HPLC analysis employing Daicel Chiracel AS-H column (hexane/*i*-PrOH = 85:15, 1.0 mL/min):  $t_1 = 12.2$  min (minor),  $t_2 = 14.7$  min (major).

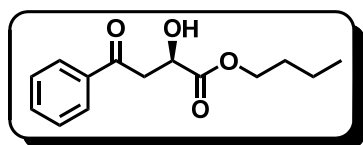

#### **(R)-*n*-butyl 2-hydroxy-4-oxo-4-phenylbutanoate (4c)**

This compound was prepared by the General Procedure described above and was obtained as colourless oil in 92% yield (0.115g, 73% *ee*):  $R_f = 0.28$  (ethyl acetate : hexane = 1/4),  $[\alpha]_D^{21} = 3.78$  ( $c = 1.72$ ,  $\text{CHCl}_3$ , for 73% *ee*);  $^1\text{H NMR}$  (300 MHz,  $\text{CDCl}_3$ ):  $\delta$  7.94 – 7.97 (m, 2H), 7.57 – 7.62 (m, 1H), 7.45 – 7.50 (m, 2H), 4.64 – 4.69 (m, 1H), 4.21 (t,  $J = 6.7$  Hz, 2H), 3.54 (dd,  $J = 17.5, 4.0$  Hz, 1H), 3.45 (dd,  $J = 17.5, 5.9$  Hz, 1H), 3.31 (d,  $J = 5.8$  Hz, 1H), 1.59 – 1.68 (m, 2H), 1.29 – 1.41 (m, 2H), 0.90 (t,  $J = 7.4$  Hz, 3H) ppm;  $^{13}\text{C NMR}$  (75 MHz,  $\text{CDCl}_3$ ):  $\delta$  197.5, 173.9, 136.4, 133.6, 128.7, 128.2, 67.2, 65.7, 42.2, 30.5, 19.0, 13.6 ppm; FTIR (KBr, neat):  $\nu$  3481, 2961, 2874, 1740, 1686, 1597, 1580, 1449, 1368, 1275, 1105  $\text{cm}^{-1}$ ; HRMS (ESI,  $m/z$ ) calcd for  $\text{C}_{14}\text{H}_{18}\text{O}_4\text{H}^+$ : 251.1283, found: 251.1284; The enantiometric excess was determined by HPLC analysis employing Daicel Chiracel AS-H column (hexane/*i*-PrOH = 85:15, 1.0 mL/min):  $t_1 = 9.8$  min (minor),  $t_2 = 11.4$  min (major).

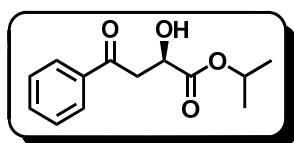

#### **(R)-isopropyl 2-hydroxy-4-oxo-4-phenylbutanoate (4d)**

This compound was prepared by the General Procedure described above and was obtained as colourless oil in 91% yield (0.107g, 96% *ee*):  $R_f = 0.27$  (ethyl acetate : hexane = 1/4),  $[\alpha]_D^{22} = +2.6$  ( $c = 1.59$ ,  $\text{CHCl}_3$ , for 96% *ee*);  $^1\text{H NMR}$  (300 MHz,  $\text{CDCl}_3$ ):  $\delta$  7.97 – 7.94 (m, 2H), 7.62 – 7.57 (m, 1H), 7.50 – 7.45 (m, 2H), 5.20 – 5.08 (m, 1H), 4.62 (dd,  $J = 9.5, 5.2$  Hz, 1H), 3.53 (dd,  $J = 17.5, 4.1$  Hz, 1H), 3.44 (dd,  $J = 17.4, 5.8$  Hz, 1H), 3.36 (d,  $J = 5.5$  Hz, 1H), 1.28 (d,  $J = 6.3$  Hz, 3H), 1.24 (d,  $J = 6.3$  Hz, 3H) ppm;  $^{13}\text{C NMR}$  (75 MHz,  $\text{CDCl}_3$ ):  $\delta$  197.5, 173.4, 136.5, 133.6, 128.7, 128.2, 69.7, 67.3, 42.2, 21.72, 21.66 ppm; FTIR (KBr, neat):  $\nu$  3520, 3019, 2984, 1728, 1682, 1597, 1580, 1449, 1375, 1215, 1105  $\text{cm}^{-1}$ ; HRMS (ESI,  $m/z$ ) calcd for  $\text{C}_{13}\text{H}_{16}\text{O}_4\text{H}^+$ :



237.1127, found: 237.1136; The enantiometric excess was determined by HPLC analysis employing Daicel Chiracel AS-H column (hexane/*i*-PrOH = 85:15, 1.0 mL/min):  $t_1 = 9.4$  min (minor),  $t_2 = 12.0$  min (major).

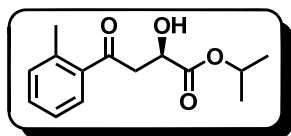

**(R)-isopropyl 2-hydroxy-4-oxo-4-o-tolylbutanoate (4e)**

This compound was prepared by the General Procedure described above and was obtained as colourless oil in 81% yield (0.101g, 94% *ee*):  $R_f = 0.26$  (ethyl acetate : hexane = 1/4),  $[\alpha]_D^{21} = +2.7$  ( $c = 1.69$ ,  $\text{CHCl}_3$ , for 94% *ee*);  $^1\text{H NMR}$  (300 MHz,  $\text{CDCl}_3$ ):  $\delta$  7.67 (d,  $J = 7.9$  Hz, 1H), 7.43 – 7.37 (m, 1H), 7.30 – 7.25 (m, 2H), 5.21 – 5.08 (m, 1H), 4.60 – 4.55 (m, 1H), 3.45 (dd,  $J = 17.5, 4.3$  Hz, 1H), 3.37 (dd,  $J = 17.6, 5.8$  Hz, 1H), 3.31 (d,  $J = 5.6$  Hz, 1H), 2.51 (s, 3H), 1.29 (d,  $J = 6.3$  Hz, 3H), 1.26 (d,  $J = 6.3$  Hz, 3H) ppm;  $^{13}\text{C NMR}$  (75 MHz,  $\text{CDCl}_3$ ):  $\delta$  201.0, 173.5, 138.7, 137.0, 132.1, 131.8, 128.8, 125.8, 69.7, 67.5, 44.8, 21.74, 21.70, 21.4 ppm; FTIR (KBr, neat):  $\nu$  3489, 2980, 2930, 1732, 1686, 1600, 1570, 1456, 1375, 1265, 1215, 1107  $\text{cm}^{-1}$ ; HRMS (ESI,  $m/z$ ) calcd for  $\text{C}_{14}\text{H}_{18}\text{O}_4\text{H}^+$ : 251.1283, found: 251.1290; The enantiometric excess was determined by HPLC analysis employing Daicel Chiracel AS-H column (hexane/*i*-PrOH = 85:15, 1.0 mL/min):  $t_1 = 8.7$  min (minor),  $t_2 = 10.7$  min (major).

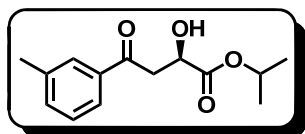

**(R)-isopropyl 2-hydroxy-4-oxo-4-m-tolylbutanoate (4f)**

This compound was prepared by the General Procedure described above and was obtained as white solid in 88% yield (0.110g, 97% *ee*):  $R_f = 0.26$  (ethyl acetate : hexane = 1/4),  $[\alpha]_D^{21} = +3.3$  ( $c = 1.87$ ,  $\text{CHCl}_3$ , for 97% *ee*);  $^1\text{H NMR}$  (300 MHz,  $\text{CDCl}_3$ ):  $\delta$  7.74 (d,  $J = 7.9$  Hz, 2H), 7.42 – 7.31 (m, 2H), 5.21 – 5.01 (m, 1H), 4.62 (d,  $J = 4.2$  Hz, 1H), 3.57 – 3.34 (m, 3H), 2.40 (s, 3H), 1.27 (d,  $J = 6.3$  Hz, 3H), 1.24 (d,  $J = 6.3$  Hz, 3H) ppm;  $^{13}\text{C NMR}$  (75 MHz,  $\text{CDCl}_3$ ):  $\delta$  7.76 – 7.73 (m, 2H), 7.40 – 7.32 (m, 2H), 5.19 – 5.06 (m, 1H), 4.62 (d,  $J = 4.2$  Hz, 1H), 3.54 – 3.39 (m, 3H), 2.40 (s, 3H), 1.27 (d,  $J = 6.3$  Hz, 3H), 1.24 (d,  $J = 6.3$  Hz, 3H) ppm; FTIR (KBr, neat):  $\nu$  3499, 3019, 2982, 1732, 1684, 1605, 1585, 1215, 1105, 756  $\text{cm}^{-1}$ ; HRMS (ESI,  $m/z$ ) calcd for  $\text{C}_{14}\text{H}_{18}\text{O}_4\text{H}^+$ : 251.1283, found: 251.1284; The enantiometric excess was determined by HPLC analysis employing Daicel Chiracel AS-H column (hexane/*i*-PrOH = 85:15, 1.0 mL/min):  $t_1 = 9.5$  min (minor),  $t_2 = 12.0$  min (major).

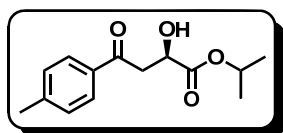

**(R)-isopropyl 2-hydroxy-4-oxo-4-p-tolylbutanoate (4g)**

This compound was prepared by the General Procedure described above and was obtained as white solid in 94% yield (0.118g, 97% *ee*):  $R_f = 0.29$  (ethyl acetate : hexane = 1/4),  $[\alpha]_D^{21} = +2.0$  ( $c = 1.92$ ,  $\text{CHCl}_3$ , for 97%

*ee*);  $^1\text{H}$  NMR (300 MHz,  $\text{CDCl}_3$ ):  $^1\text{H}$  NMR (300 MHz,  $\text{CDCl}_3$ ):  $\delta$  7.85 (d,  $J = 8.1$  Hz, 2H), 7.27 (d,  $J = 8.1$  Hz, 2H), 5.21 – 5.07 (m, 1H), 4.61 (dd,  $J = 10.0, 5.1$  Hz, 1H), 3.49 (dd,  $J = 17.5, 4.2$  Hz, 1H), 3.41 (dd,  $J = 17.9, 6.0$  Hz, 1H), 3.37 – 3.34 (m, 1H), 2.42 (s, 3H), 1.28 (d,  $J = 6.3$  Hz, 3H), 1.24 (d,  $J = 6.3$  Hz, 3H) ppm;  $^{13}\text{C}$  NMR (75 MHz,  $\text{CDCl}_3$ ):  $\delta = 197.2, 173.5, 144.6, 134.2, 129.4, 128.4, 69.7, 67.5, 42.1, 21.80, 21.76, 21.75$  ppm; FTIR (KBr, neat):  $\nu$  3676, 3019, 2934, 1728, 1684, 1607, 1215, 1105  $\text{cm}^{-1}$ ; HRMS (ESI,  $m/z$ ) calcd for  $\text{C}_{14}\text{H}_{18}\text{O}_4\text{H}^+$ : 251.1283, found: 251.1287; The enantiometric excess was determined by HPLC analysis employing Daicel Chiracel AS-H column (hexane/*i*-PrOH = 85:15, 1.0 mL/min):  $t_1 = 9.3$  min (minor),  $t_2 = 11.9$  min (major).

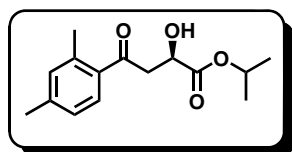

#### **(R)-isopropyl 4-(2,4-dimethylphenyl)-2-hydroxy-4-oxobutanoate (4h)**

This compound was prepared by the General Procedure described above and was obtained as colourless oil in 80% yield (0.106g, 95% *ee*):  $R_f = 0.27$  (ethyl acetate : hexane = 1/4),  $[\alpha]_D^{21} = +1.3$  ( $c = 2.10$ ,  $\text{CHCl}_3$ , for 95% *ee*);  $^1\text{H}$  NMR (300 MHz,  $\text{CDCl}_3$ ):  $\delta$  7.61 (d,  $J = 8.6$  Hz, 1H), 7.08 (d,  $J = 8.6$  Hz, 2H), 7.06 (s, 1H), 5.20 – 5.08 (m, 1H), 4.59 – 4.54 (m, 1H), 3.43 (dd,  $J = 17.5, 4.2$  Hz, 1H), 3.36 (dd,  $J = 17.1, 5.5$  Hz, 1H), 3.34 (d,  $J = 5.8$  Hz, 1H), 2.50 (s, 3H), 2.36 (s, 3H), 1.28 (d,  $J = 6.3$  Hz, 3H), 1.25 (d,  $J = 6.3$  Hz, 3H) ppm;  $^{13}\text{C}$  NMR (75 MHz,  $\text{CDCl}_3$ ):  $\delta$  200.2, 173.6, 142.6, 139.2, 134.0, 133.0, 129.4, 126.4, 69.6, 67.5, 44.5, 21.72, 21.68, 21.63, 21.4 ppm; FTIR (KBr, neat):  $\nu$  3676, 2980, 2926, 1732, 1682, 1611, 1566, 1267, 1213, 1107  $\text{cm}^{-1}$ ; HRMS (ESI,  $m/z$ ) calcd for  $\text{C}_{15}\text{H}_{20}\text{O}_4\text{H}^+$ : 265.1440, found: 265.1440; The enantiometric excess was determined by HPLC analysis employing Daicel Chiracel AS-H column (hexane/*i*-PrOH = 85:15, 1.0 mL/min):  $t_1 = 8.0$  min (minor),  $t_2 = 10.1$  min (major).

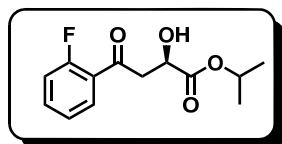

#### **(R)-isopropyl 4-(2-fluorophenyl)-2-hydroxy-4-oxobutanoate (4i)**

This compound was prepared by the General Procedure described above and was obtained as yellow oil in 60% yield (0.076g, 93% *ee*):  $R_f = 0.26$  (ethyl acetate : hexane = 1/4),  $[\alpha]_D^{21} = +5.1$  ( $c = 1.51$ ,  $\text{CHCl}_3$ , for 93% *ee*);  $^1\text{H}$  NMR (300 MHz,  $\text{CDCl}_3$ )  $\delta$  7.92 – 7.86 (m, 1H), 7.59 – 7.51 (m, 1H), 7.28 – 7.12 (m, 2H), 5.20 – 5.08 (m, 1H), 4.58 (dd,  $J = 9.7, 5.4$  Hz, 1H), 3.59 – 3.41 (m, 2H), 3.31 (d,  $J = 5.6$  Hz, 1H), 1.28 (d,  $J = 6.3$  Hz, 3H), 1.25 (d,  $J = 6.3$  Hz, 3H) ppm;  $^{13}\text{C}$  NMR (75 MHz, DMSO):  $\delta$  195.3 (d,  $J = 3.9$  Hz), 173.4, 162.1 (d,  $J = 255.0$  Hz), 135.1 (d,  $J = 9.1$  Hz), 130.6 (d,  $J = 2.4$  Hz), 125.1 (d,  $J = 12.6$  Hz), 124.6 (d,  $J = 3.4$  Hz), 116.7 (d,  $J = 23.7$  Hz), 69.7, 67.1 (d,  $J = 2.7$  Hz), 47.1 (d,  $J = 8.1$  Hz), 21.7, 21.6 ppm; FTIR (KBr, neat):  $\nu$  3676, 3082, 3021, 1730, 1686, 1609, 1481, 1452, 1215, 1103  $\text{cm}^{-1}$ ; HRMS (ESI,  $m/z$ ) calcd for  $\text{C}_{13}\text{H}_{15}\text{FO}_4\text{H}^+$ : 255.1033, found:

255.1033; The enantiometric excess was determined by HPLC analysis employing Daicel Chiracel AS-H column (hexane/ hexane/*i*-PrOH = 92.5:7.5, 0.75 mL/min):  $t_1 = 23.2$  min (minor),  $t_2 = 26.9$  min (major).

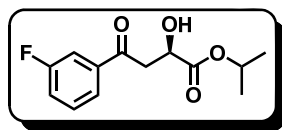

**(R)-isopropyl 4-(3-fluorophenyl)-2-hydroxy-4-oxobutanoate (4j)**

This compound was prepared by the General Procedure described above and was obtained as white solid in 85% yield (0.108g, 93% *ee*):  $R_f = 0.23$  (ethyl acetate : hexane = 1/4),  $[\alpha]_D^{21} = +6.1$  ( $c = 1.62$ ,  $\text{CHCl}_3$ , for 93% *ee*);  $^1\text{H NMR}$  (300 MHz,  $\text{CDCl}_3$ ):  $\delta$  7.75 – 7.72 (m, 1H), 7.66 – 7.61 (m, 1H), 7.50 – 7.42 (m, 1H), 7.32 – 7.26 (m, 1H), 5.20 – 5.07 (m, 1H), 4.63 (dd,  $J = 9.5, 5.1$  Hz, 1H), 3.50 (dd,  $J = 17.4, 4.1$  Hz, 1H), 3.41 (dd,  $J = 17.3, 5.8$  Hz, 1H), 3.38 (bs, 1H), 1.28 (d,  $J = 6.3$  Hz, 3H), 1.25 (d,  $J = 6.3$  Hz, 3H) ppm;  $^{13}\text{C NMR}$  (75 MHz,  $\text{CDCl}_3$ ):  $\delta$  196.1, 173.3, 162.8 (d,  $J = 248.3$  Hz), 138.6 (d,  $J = 6.5$  Hz), 130.4 (d,  $J = 7.6$  Hz), 124.0 (d,  $J = 3.0$  Hz), 120.6 (d,  $J = 21.5$  Hz), 114.9 (d,  $J = 22.4$  Hz), 69.8, 67.1, 42.3, 21.68, 21.64 ppm; FTIR (KBr, neat):  $\nu$  3377, 3019, 2984, 1730, 1692, 1589, 1445, 1215, 1105  $\text{cm}^{-1}$ ; HRMS (ESI,  $m/z$ ) calcd for  $\text{C}_{13}\text{H}_{15}\text{FO}_4\text{H}^+$ : 255.1033, found: 255.1039; The enantiometric excess was determined by HPLC analysis employing Daicel Chiracel AS-H column (hexane/*i*-PrOH = 85:15, 1.0 mL/min):  $t_1 = 8.6$  min (minor),  $t_2 = 10.4$  min (major).

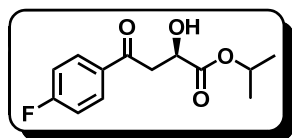

**(R)-isopropyl 4-(4-fluorophenyl)-2-hydroxy-4-oxobutanoate (4k)**

This compound was prepared by the General Procedure described above and was obtained as white solid in 71% yield (0.090g, 96% *ee*):  $R_f = 0.31$  (ethyl acetate : hexane = 1/4),  $[\alpha]_D^{21} = +3.9$  ( $c = 1.88$ ,  $\text{CHCl}_3$ , for 96% *ee*);  $^1\text{H NMR}$  (300 MHz,  $\text{CDCl}_3$ ):  $\delta$  8.01 – 7.95 (m, 2H), 7.17 – 7.11 (m, 2H), 5.20 – 5.07 (m, 1H), 4.64 – 4.59 (m, 1H), 3.49 (dd,  $J = 17.3, 4.0$  Hz, 1H), 3.40 (dd,  $J = 17.3, 5.8$  Hz, 1H), 3.32 (d,  $J = 5.6$  Hz, 1H), 1.28 (d,  $J = 6.3$  Hz, 3H), 1.25 (d,  $J = 6.3$  Hz, 3H) ppm;  $^{13}\text{C NMR}$  (75 MHz,  $\text{CDCl}_3$ ):  $\delta$  195.8, 173.3, 166.0 (d,  $J = 255.4$  Hz), 133.1 (d,  $J = 3.0$  Hz), 130.9 (d,  $J = 9.4$  Hz), 116.0 (d,  $J = 2.9$  Hz), 115.7 (d,  $J = 2.9$  Hz), 69.7 (d,  $J = 5.2$  Hz), 67.2, 42.1, 21.7 (d,  $J = 2.8$  Hz), 21.6 (d,  $J = 2.8$  Hz) ppm; FTIR (KBr, neat):  $\nu$  3198, 2984, 2938, 1802, 1732, 1686, 1599, 1468, 1375, 1231, 1103, 1049  $\text{cm}^{-1}$ ; HRMS (ESI,  $m/z$ ) calcd for  $\text{C}_{13}\text{H}_{15}\text{FO}_4\text{H}^+$ : 255.1033, found: 255.1037; The enantiometric excess was determined by HPLC analysis employing Daicel Chiracel AS-H column (hexane/*i*-PrOH = 85:15, 1.0 mL/min):  $t_1 = 10.7$  min (minor),  $t_2 = 12.2$  min (major).

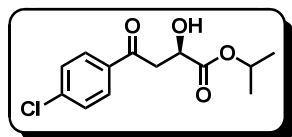

**(R)-isopropyl 4-(4-chlorophenyl)-2-hydroxy-4-oxobutanoate (4l)**

This compound was prepared by the General Procedure described above and was obtained as white solid in 82% yield (0.111g, 97% *ee*):  $R_f = 0.23$  (ethyl acetate : hexane = 1/4),  $[\alpha]_D^{21} = +5.3$  ( $c = 2.07$ ,  $\text{CHCl}_3$ , for 97% *ee*);  $^1\text{H NMR}$  (300 MHz,  $\text{CDCl}_3$ ):  $\delta$  7.89 (d,  $J = 8.4$  Hz, 2H), 7.44 (d,  $J = 8.2$  Hz, 2H), 5.19 – 5.07 (m, 1H), 4.64 – 4.59 (m, 1H), 3.48 (dd,  $J = 17.3, 4.1$  Hz, 1H), 3.40 (dd,  $J = 17.2, 5.9$  Hz, 1H), 3.39 (bs, 1H), 1.28 (d,  $J = 6.3$  Hz, 3H), 1.24 (d,  $J = 6.3$  Hz, 3H) ppm;  $^{13}\text{C NMR}$  (75 MHz,  $\text{CDCl}_3$ ):  $\delta$  196.2, 173.3, 140.1, 134.9, 129.6, 129.0, 69.8, 67.2, 42.1, 21.71, 21.67 ppm; FTIR (KBr, neat):  $\nu$  3441, 3401, 3019, 2984, 1732, 1682, 1589, 1400, 1215, 816, 756  $\text{cm}^{-1}$ ; HRMS (ESI,  $m/z$ ) calcd for  $\text{C}_{13}\text{H}_{15}\text{ClO}_4\text{H}^+$ : 271.0737, found: 271.0735; The enantiometric excess was determined by HPLC analysis employing Daicel Chiracel AS-H column (hexane/*i*-PrOH = 85:15, 1.0 mL/min):  $t_1 = 9.9$  min (minor),  $t_2 = 11.0$  min (major).

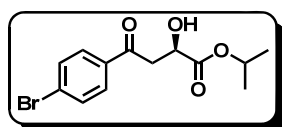

**(*R*)-isopropyl 4-(4-bromophenyl)-2-hydroxy-4-oxobutanoate (4m)**

This compound was prepared by the General Procedure described above and was obtained as white solid in 85% yield (0.134g, 98% *ee*):  $R_f = 0.26$  (ethyl acetate : hexane = 1/4),  $[\alpha]_D^{21} = +3.1$  ( $c = 1.67$ ,  $\text{CHCl}_3$ , for 98% *ee*);  $^1\text{H NMR}$  (300 MHz,  $\text{CDCl}_3$ ):  $\delta$  7.84 – 7.79 (m, 2H), 7.64 – 7.59 (m, 2H), 5.17 – 5.09 (m, 1H), 4.63 – 4.60 (m, 1H), 3.48 (dd,  $J = 17.3, 4.1$  Hz, 1H), 3.39 (dd,  $J = 17.4, 5.8$  Hz, 1H), 3.36 (bs, 1H), 1.28 (d,  $J = 6.3$  Hz, 3H), 1.24 (d,  $J = 6.3$  Hz, 3H) ppm;  $^{13}\text{C NMR}$  (75 MHz,  $\text{CDCl}_3$ ):  $\delta$  196.4, 173.3, 135.3, 132.0, 129.7, 128.8, 69.8, 67.2, 42.1, 21.70, 21.66 ppm; FTIR (KBr, neat):  $\nu$  3516, 3019, 2982, 1730, 1682, 1585, 1466, 1398, 1215, 1105, 752  $\text{cm}^{-1}$ ; HRMS (ESI,  $m/z$ ) calcd for  $\text{C}_{13}\text{H}_{15}\text{BrO}_4\text{H}^+$ : 315.0232, found: 315.0250; The enantiometric excess was determined by HPLC analysis employing Daicel Chiracel AS-H column (hexane/*i*-PrOH = 85:15, 1.0 mL/min):  $t_1 = 10.2$  min (minor),  $t_2 = 11.3$  min (major).

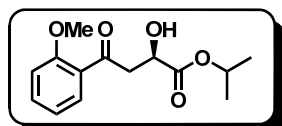

**(*R*)-isopropyl 2-hydroxy-4-(2-methoxyphenyl)-4-oxobutanoate (4n)**

This compound was prepared by the General Procedure described above and was obtained as yellow oil in 83% yield (0.111g, 92% *ee*):  $R_f = 0.14$  (ethyl acetate : hexane = 1/4),  $[\alpha]_D^{22} = -1.0$  ( $c = 1.57$ ,  $\text{CHCl}_3$ , for 92% *ee*);  $^1\text{H NMR}$  (300 MHz,  $\text{CDCl}_3$ ):  $\delta$  7.79 – 7.75 (m, 1H), 7.52 – 7.46 (m, 1H), 7.03 – 6.96 (m, 2H), 5.19 – 5.06 (m, 1H), 4.58 – 4.52 (m, 1H), 3.92 (s, 3H), 3.57 (dd,  $J = 18.0, 4.0$  Hz, 1H), 3.46 (dd,  $J = 18.0, 6.0$  Hz, 1H), 3.33 (d,  $J = 5.3$  Hz, 1H), 1.28 (d,  $J = 6.3$  Hz, 3H), 1.24 (d,  $J = 6.3$  Hz, 3H) ppm;  $^{13}\text{C NMR}$  (75 MHz,  $\text{CDCl}_3$ ):  $\delta$  198.9, 173.7, 159.0, 134.3, 130.6, 127.1, 120.7, 111.6, 69.4, 67.6, 55.5, 47.7, 21.73, 21.65 ppm; FTIR (KBr, neat):  $\nu$  3522, 2980, 2940, 1732, 1668, 1597, 1485, 1246, 1105, 1022  $\text{cm}^{-1}$ ; HRMS (ESI,  $m/z$ ) calcd for  $\text{C}_{14}\text{H}_{18}\text{O}_5\text{H}^+$ : 267.1232, found: 267.1239; The enantiometric excess was determined by HPLC analysis employing Daicel Chiracel AS-H column (hexane/*i*-PrOH = 85:15, 1.0 mL/min):  $t_1 = 15.8$  min (minor),  $t_2 = 22.1$  min (major).

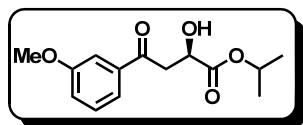

**(R)-isopropyl 2-hydroxy-4-(3-methoxyphenyl)-4-oxobutanoate (4o)**

This compound was prepared by the General Procedure described above and was obtained as colourless oil in 85% yield (0.113g, 95% *ee*):  $R_f = 0.14$  (ethyl acetate : hexane = 1/4),  $[\alpha]_D^{22} = +2.9$  ( $c = 1.54$ ,  $\text{CHCl}_3$ , for 95% *ee*);  $^1\text{H NMR}$  (300 MHz,  $\text{CDCl}_3$ ):  $\delta$  7.54 – 7.47 (m, 2H), 7.41 – 7.35 (m, 1H), 7.15 – 7.11 (m, 1H), 5.20 – 5.07 (m, 1H), 5.20 – 5.07 (m, 1H), 4.62 (dd,  $J = 9.5, 5.1$  Hz, 1H), 3.85 (s, 3H), 3.51 (dd,  $J = 17.4, 4.0$  Hz, 1H), 3.42 (dd,  $J = 17.4, 5.8$  Hz, 1H), 3.37 (d,  $J = 4.4$  Hz, 1H), 1.28 (d,  $J = 6.3$  Hz, 3H), 1.24 (d,  $J = 6.3$  Hz, 3H) ppm;  $^{13}\text{C NMR}$  (75 MHz,  $\text{CDCl}_3$ ):  $\delta$  197.3, 173.4, 159.9, 137.9, 129.7, 120.8, 120.1, 112.3, 69.7, 67.3, 55.4, 42.3, 21.71, 21.66 ppm; FTIR (KBr, neat):  $\nu$  3493, 2982, 2939, 1744, 1688, 1597, 1467, 1260, 1105, 1042  $\text{cm}^{-1}$ ; HRMS (ESI,  $m/z$ ) calcd for  $\text{C}_{14}\text{H}_{18}\text{O}_5\text{H}^+$ : 267.1232, found: 267.1235; The enantiometric excess was determined by HPLC analysis employing Daicel Chiracel AS-H column (hexane/*i*-PrOH = 85:15, 1.0 mL/min):  $t_1 = 12.1$  min (minor),  $t_2 = 15.5$  min (major).

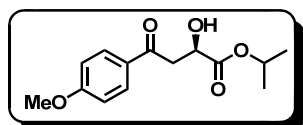

**(R)-isopropyl 2-hydroxy-4-(4-methoxyphenyl)-4-oxobutanoate (4p)**

This compound was prepared by the General Procedure described above and was obtained as white solid in 88% yield (0.117g, 98% *ee*):  $R_f = 0.19$  (ethyl acetate : hexane = 1/4),  $[\alpha]_D^{21} = +0.7$  ( $c = 1.51$ , for 98% *ee*);  $^1\text{H NMR}$  (300 MHz,  $\text{CDCl}_3$ ):  $\delta$  7.85 (d,  $J = 7.9$  Hz, 2H), 7.26 (d,  $J = 7.7$  Hz, 2H), 5.18 – 5.06 (m, 1H), 4.62 (dd,  $J = 9.5, 5.1$  Hz, 1H), 3.52 – 3.37 (m, 3H), 2.40 (s, 3H), 1.27 (d,  $J = 6.3$  Hz, 3H), 1.23 (d,  $J = 6.3$  Hz, 3H) ppm;  $^{13}\text{C NMR}$  (75 MHz,  $\text{CDCl}_3$ ):  $\delta$  197.1, 173.4, 144.4, 134.1, 129.3, 128.5, 128.3, 69.5, 67.3, 42.1, 21.7, 21.6 ppm; FTIR (KBr, neat):  $\nu$  3566, 3019, 2984, 1730, 1680, 1607, 1215, 1105, 754  $\text{cm}^{-1}$ ; HRMS (ESI,  $m/z$ ) calcd for  $\text{C}_{14}\text{H}_{18}\text{O}_5\text{H}^+$ : 267.1232, found: 267.1227; The enantiometric excess was determined by HPLC analysis employing Daicel Chiracel AS-H column (hexane/*i*-PrOH = 85:15, 1.0 mL/min):  $t_1 = 9.7$  min (minor),  $t_2 = 12.4$  min (major).

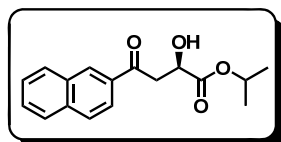

**(R)-isopropyl 2-hydroxy-4-(naphthalen-2-yl)-4-oxobutanoate (4q)**

This compound was prepared by the General Procedure described above and was obtained as colourless oil in 89% yield (0.127g, 98% *ee*):  $R_f = 0.21$  (ethyl acetate : hexane = 1/4),  $[\alpha]_D^{22} = -0.6$  ( $c = 1.60$ ,  $\text{CHCl}_3$ , for 98% *ee*);  $^1\text{H NMR}$  (300 MHz,  $\text{CDCl}_3$ ):  $\delta$  8.46 (s, 1H), 8.02 – 7.94 (m, 2H), 7.89 – 7.85 (m, 2H), 7.63 – 7.52 (m,

2H), 5.21 – 5.10 (m, 1H), 4.72 – 4.67(m, 1H), 3.65 (dd,  $J = 17.4, 4.3$  Hz, 1H), 3.58 (dd,  $J = 17.4, 5.9$  Hz, 1H), 3.48 (d,  $J = 5.2$  Hz, 1H), 1.28 (d,  $J = 6.3$  Hz, 3H), 1.25 (d,  $J = 6.2$  Hz, 3H) ppm;  $^{13}\text{C}$  NMR (75 MHz,  $\text{CDCl}_3$ ):  $\delta$  197.4, 173.5, 135.8, 133.9, 132.4, 130.1, 129.6, 128.7, 128.6, 127.8, 126.9, 123.6, 69.7, 67.4, 42.3, 21.74, 21.69 ppm; FTIR (KBr, neat):  $\nu$  3503, 3059, 2982, 2936, 1734, 1680, 1628, 1470, 1375, 1215, 1105  $\text{cm}^{-1}$ ; HRMS (ESI,  $m/z$ ) calcd for  $\text{C}_{17}\text{H}_{18}\text{O}_4\text{H}^+$ : 287.1283, found: 287.1290; The enantiometric excess was determined by HPLC analysis employing Daicel Chiracel AS-H column (hexane/*i*-PrOH = 85:15, 1.0mL/min):  $t_1 = 11.2$  min (minor),  $t_2 = 15.6$  min (major).

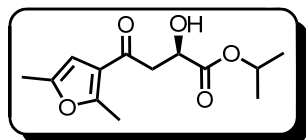

**(R)-isopropyl 4-(2,5-dimethylfuran-3-yl)-2-hydroxy-4-oxobutanoate (4r)**

This compound was prepared by the General Procedure described above and was obtained as yellow solid in 76% yield (0.097g, 90% *ee*):  $R_f = 0.22$  (ethyl acetate : hexane = 1/4),  $[\alpha]_D^{22} = +1.2$  ( $c = 1.89$ ,  $\text{CHCl}_3$ , for 90% *ee*);  $^1\text{H}$  NMR (300 MHz,  $\text{CDCl}_3$ )  $\delta$  6.19 (d,  $J = 0.7$  Hz, 1H), 5.19 – 5.06 (m, 1H), 4.56 – 4.50 (m, 1H), 3.37 (d,  $J = 5.8$  Hz, 1H), 3.20 (dd,  $J = 17.3, 4.2$  Hz, 1H), 3.12 (dd,  $J = 17.4, 6.0$  Hz, 1H), 2.54 (s, 3H), 2.26 (s, 3H), 1.28 (d,  $J = 6.3$  Hz, 3H), 1.25 (d,  $J = 6.3$  Hz, 3H) ppm;  $^{13}\text{C}$  NMR (75 MHz,  $\text{CDCl}_3$ ):  $\delta$  193.5, 173.4, 157.7, 150.2, 121.4, 105.4, 69.5, 67.3, 44.4, 21.71, 21.66, 14.4, 13.2 ppm; FTIR (KBr, neat):  $\nu$  3508, 2982, 2924, 1732, 1674, 1572, 1402, 1375, 1233, 1107  $\text{cm}^{-1}$ ; HRMS (ESI,  $m/z$ ) calcd for  $\text{C}_{13}\text{H}_{18}\text{O}_5\text{H}^+$ : 255.1232, found: 255.1240; The enantiometric excess was determined by HPLC analysis employing Daicel Chiracel AS-H column (hexane/*i*-PrOH = 85:15, 1.0 mL/min):  $t_1 = 7.9$  min (minor),  $t_2 = 9.4$  min (major).

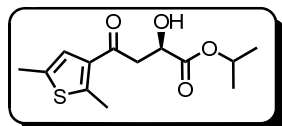

**(R)-isopropyl 4-(2,5-dimethylthiophen-3-yl)-2-hydroxy-4-oxobutanoate (4s)**

This compound was prepared by the General Procedure described above and was obtained as yellow oil in 92% yield (0.124g, 96% *ee*):  $R_f = 0.24$  (ethyl acetate : hexane = 1/4),  $[\alpha]_D^{22} = -0.8$  ( $c = 1.62$ ,  $\text{CHCl}_3$ , for 96% *ee*);  $^1\text{H}$  NMR (300 MHz,  $\text{CDCl}_3$ ):  $\delta$  6.98 (d,  $J = 1.0$  Hz, 1H), 5.19 – 5.07 (m, 1H), 4.57 – 4.52 (m, 1H), 3.37 (d,  $J = 5.8$  Hz, 1H), 3.31 (dd,  $J = 17.5, 4.3$  Hz, 1H), 3.24 (dd,  $J = 17.5, 5.7$  Hz, 1H), 2.66 (s, 3H), 2.41 (s, 3H), 1.28 (d,  $J = 6.3$  Hz, 3H), 1.25 (d,  $J = 6.3$  Hz, 3H) ppm;  $^{13}\text{C}$  NMR (75 MHz,  $\text{CDCl}_3$ ):  $\delta$  193.2, 173.5, 148.5, 135.4, 135.0, 125.8, 69.5, 67.4, 44.9, 21.72, 21.66, 16.09, 15.0 ppm; FTIR (KBr, neat):  $\nu$  3505, 2980, 2922, 1732, 1670, 1549, 1481, 1373, 1265, 1225, 1107  $\text{cm}^{-1}$ ; HRMS (ESI,  $m/z$ ) calcd for  $\text{C}_{13}\text{H}_{18}\text{O}_4\text{SH}^+$ : 271.1004, found: 271.1005; The enantiometric excess was determined by HPLC analysis employing Daicel Chiracel AS-H column (hexane/*i*-PrOH = 85:15, 1.0 mL/min):  $t_1 = 9.9$  min (minor),  $t_2 = 12.5$  min (major).

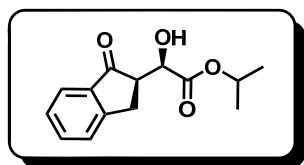

**(2R)-isopropyl 2-hydroxy-2-(1-oxo-2,3-dihydro-1H-inden-2-yl)acetate (6)**

This compound was prepared by the General Procedure described above and was obtained as yellow oil in 94% yield (0.117g, 97:3 dr, 98% *ee* (major), 92% *ee* (minor)):  $R_f = 0.24$  (ethyl acetate : hexane = 1/4),  $[\alpha]_D^{22} = +65.8$  ( $c = 1.51$ ,  $\text{CHCl}_3$ , for 98% *ee*);  $^1\text{H NMR}$  (300 MHz,  $\text{CDCl}_3$ ):  $\delta$  7.78 (d,  $J = 7.7$  Hz, 1H), 7.62 – 7.57 (m, 1H), 7.46 (d,  $J = 7.7$  Hz, 1H), 7.37 (t,  $J = 7.4$  Hz, 1H), 5.22 – 5.10 (m, 1H), 4.91 (dd,  $J = 4.4, 2.1$  Hz, 1H), 3.18 – 3.08 (m, 3H), 2.98 (d,  $J = 4.4$  Hz, 1H), 1.30 (d,  $J = 3.6$  Hz, 3H), 1.28 (d,  $J = 3.6$  Hz, 3H) ppm;  $^{13}\text{C NMR}$  (75 MHz,  $\text{CDCl}_3$ ):  $\delta$  205.1, 173.6, 154.0, 136.7, 135.0, 127.5, 126.5, 124.1, 70.1, 69.6, 50.0, 26.5, 21.74, 21.68 ppm; FTIR (KBr, neat):  $\nu$  3503, 2982, 2936, 1712, 1609, 1466, 1281, 1105  $\text{cm}^{-1}$ ; HRMS (ESI,  $m/z$ ) calcd for  $\text{C}_{14}\text{H}_{16}\text{O}_4\text{H}^+$ : 249.1127, found: 249.1123; The enantiometric excess was determined by HPLC analysis employing Daicel Chiracel AS-H column (hexane/*i*-PrOH = 97:3, 1.25 mL/min): (major diastereomer)  $t_1 = 32.3$  min (minor),  $t_2 = 49.5$  min (major); (minor diastereomer)  $t_3 = 27.9$  min (minor),  $t_4 = 40.4$  min (major).

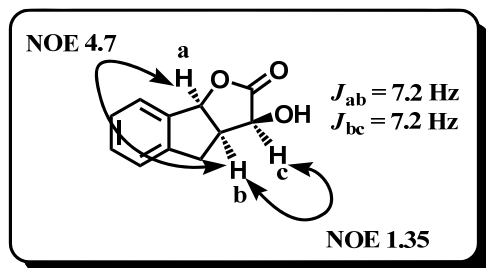

**(3S)-3-hydroxy-3,3a,4,8b-tetrahydro-2H-indeno[1,2-b]furan-2-one (7)**

To a solution of (2R)-isopropyl 2-hydroxy-2-(1-oxo-2,3-dihydro-1H-inden-2-yl)acetate (0.124 g, 0.5mmol) in MeOH (2 ml) was added  $\text{NaBH}_4$  (0.038 g, 1.0 mmol) at  $-20$  °C. The reaction mixture was stirred for 30 minutes, and the reaction was quenched by addition of acetone. The mixture was kept stirring for 10 minutes, and then saturated  $\text{NH}_4\text{Cl}$  aqueous solution was added. The mixture was extracted with  $\text{CH}_2\text{Cl}_2$  three times, and the extract was dried over anhydrous  $\text{MgSO}_4$ . The solvents were evaporated to give a crude alcohol. To a solution of the crude product in  $\text{CH}_2\text{Cl}_2$  (2 mL) was added  $\text{TsOH}\cdot\text{H}_2\text{O}$ , and the reaction mixture was stirred for 16 h at room temperature. The reaction was quenched by addition of a saturated  $\text{NaHCO}_3$  aqueous solution, and was extracted with  $\text{CH}_2\text{Cl}_2$  three times. The extract was dried over anhydrous  $\text{MgSO}_4$ . The solvents were evaporated to give a residue, followed by purification on silica gel chromatography to afford yellow oil in 67% yield (0.064g);  $R_f = 0.26$  (ethyl acetate/hexane = 1/4);  $[\alpha]_D^{21} = 81.32$  ( $c = 1.30$ ,  $\text{CHCl}_3$ , for 98% *ee*)  $^1\text{H NMR}$  (400 MHz,  $\text{CDCl}_3$ ):  $\delta$  7.43 (d,  $J = 7.5$  Hz, 1H), 7.36 – 7.26 (m, 3H), 5.94 (d,  $J = 7.2$  Hz, 1H), 4.12 (dd,  $J = 7.2, 3.4$  Hz, 1H), 3.92 (d,  $J = 3.6$  Hz, 1H), 3.31 – 3.23 (m, 2H), 3.16 – 3.10 (m, 1H) ppm;  $^{13}\text{C NMR}$  (101 MHz,  $\text{CDCl}_3$ ):  $\delta$  178.2, 141.7, 138.5, 130.0, 127.7, 125.81, 125.79, 85.2, 73.6, 46.1, 34.9 ppm; FTIR (KBr, neat):  $\nu$

3429, 2928, 2857, 1769, 1609, 1462, 1317, 1182, 1119, 995, 743  $\text{cm}^{-1}$ ; HRMS (ESI,  $m/z$ ) calcd for  $\text{C}_{11}\text{H}_{10}\text{O}_3\text{H}^+$ :  
191.0708, found: 191.0712.



# <sup>1</sup>H-NMR, <sup>13</sup>C-NMR, HPLC and GC Chromatograms (*R*)-methyl 2-hydroxy-4-oxo-4-phenylbutanoate

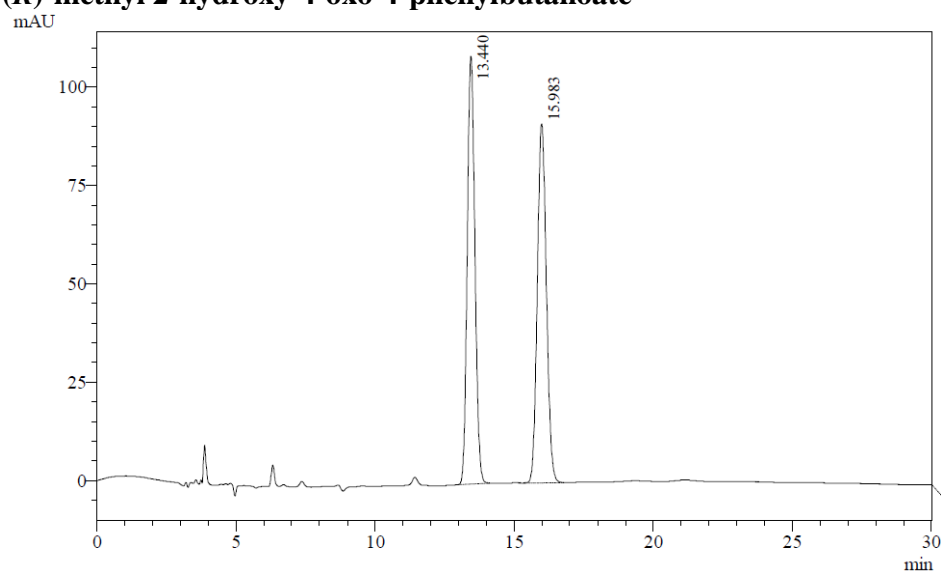

PDA Ch1 254nm 4mm

| Peak# | Ret. Time | Area    | Area %  |
|-------|-----------|---------|---------|
| 1     | 13.440    | 2068087 | 49.906  |
| 2     | 15.983    | 2075838 | 50.094  |
| Total |           | 4143925 | 100.000 |

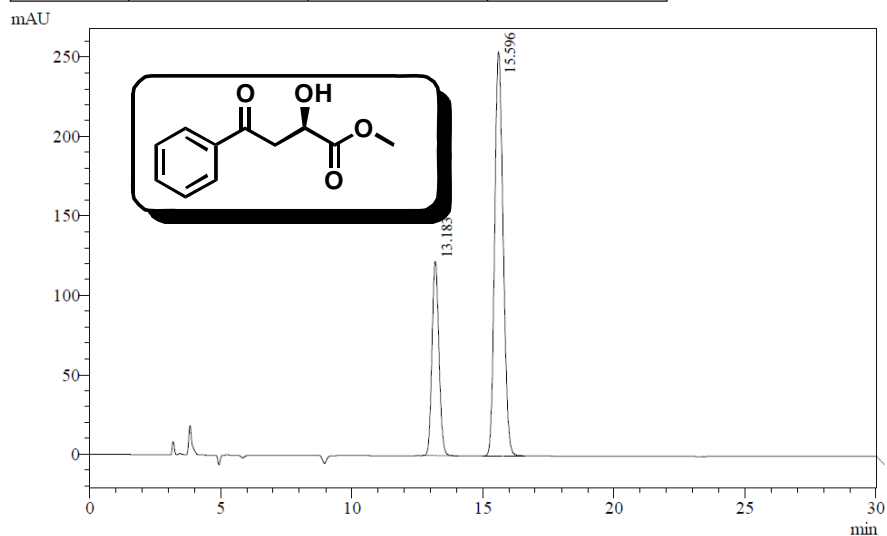

PDA Ch1 254nm 4mm

| Peak# | Ret. Time | Area    | Area %  |
|-------|-----------|---------|---------|
| 1     | 13.183    | 2257801 | 28.287  |
| 2     | 15.596    | 5724093 | 71.713  |
| Total |           | 7981895 | 100.000 |

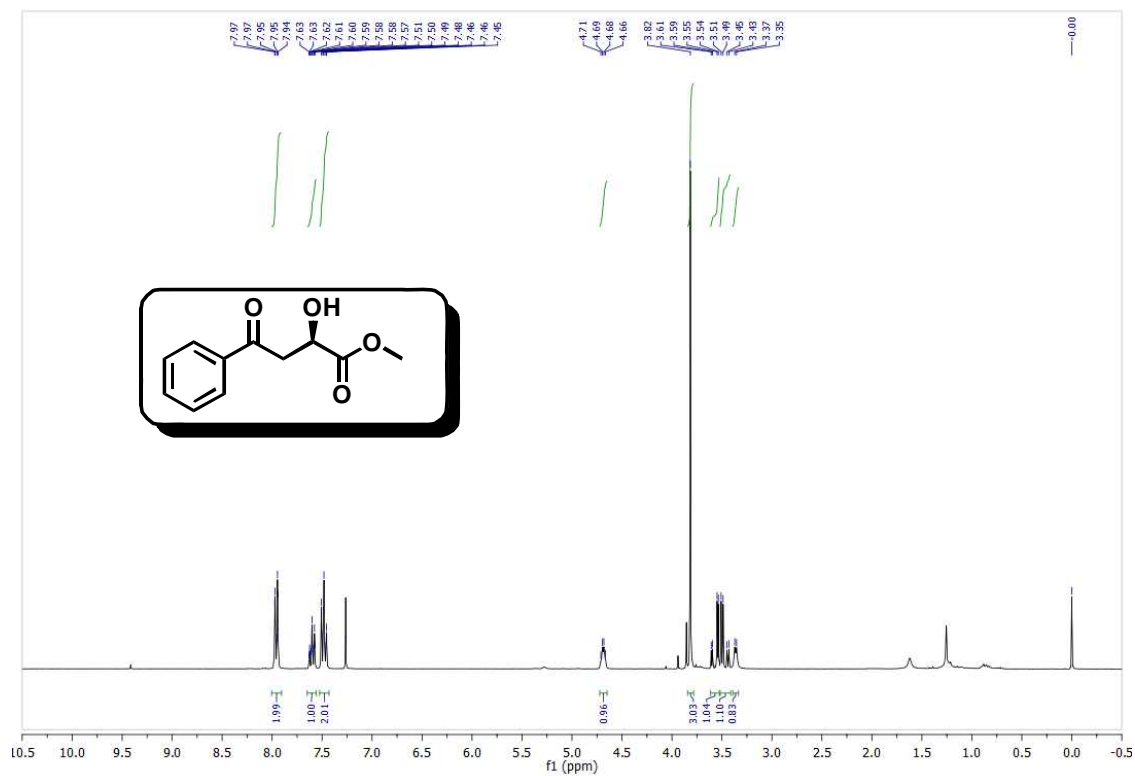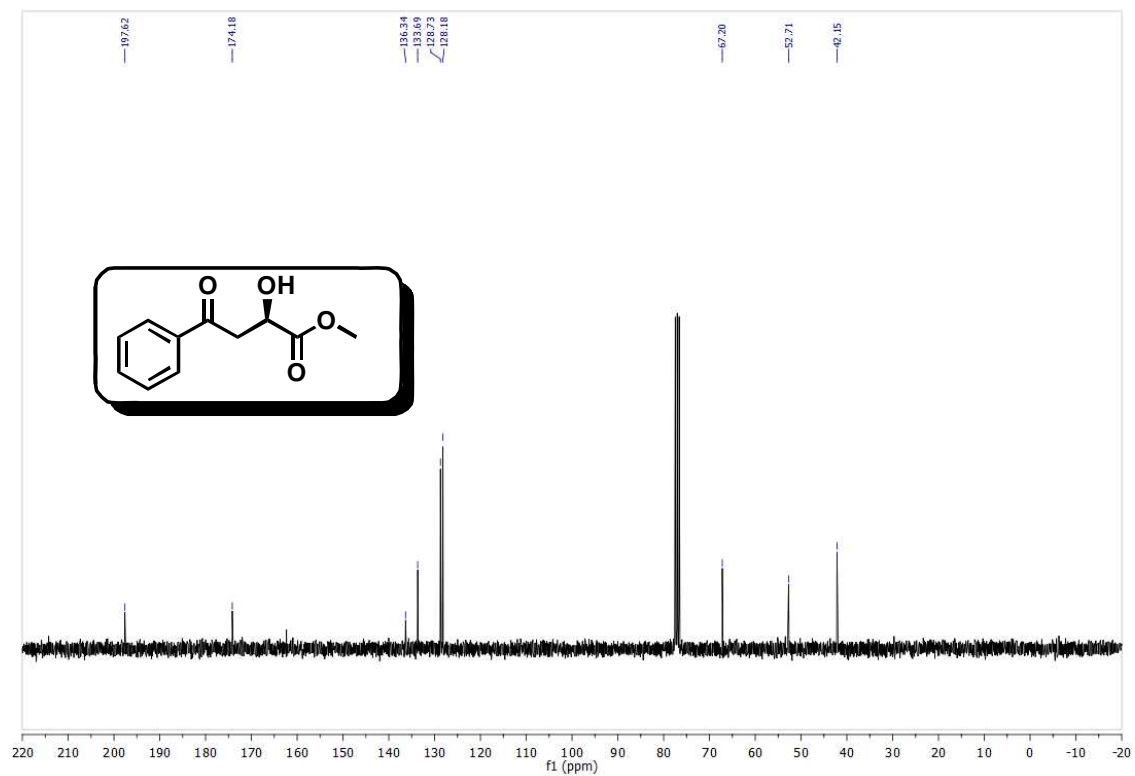

**(R)-ethyl 2-hydroxy-4-oxo-4-phenylbutanoate**

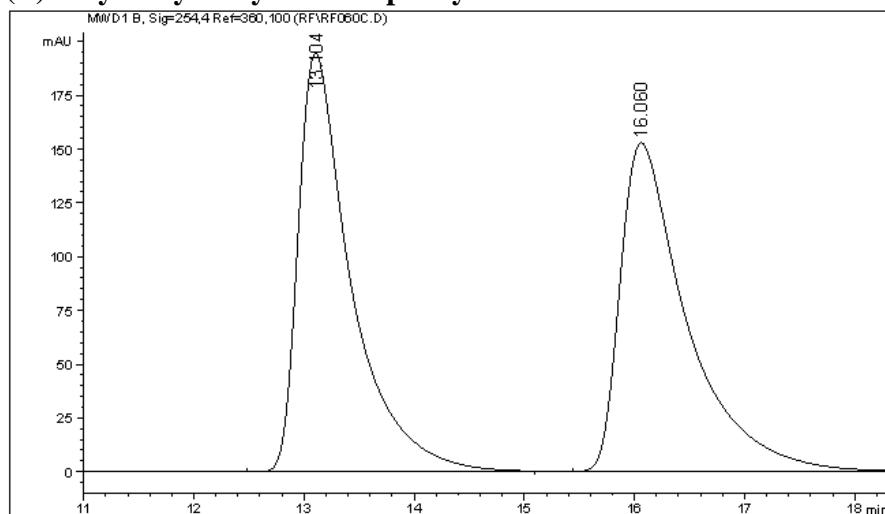

Signal 1: MWD1 B, Sig=254,4 Ref=360,100

| Peak # | RetTime [min] | Type | Width [min] | Area [mAU*s] | Height [mAU] | Area %  |
|--------|---------------|------|-------------|--------------|--------------|---------|
| 1      | 13.104        | VB   | 0.4867      | 6478.61621   | 194.45686    | 50.2475 |
| 2      | 16.060        | BB   | 0.6160      | 6414.80615   | 152.72653    | 49.7525 |

Totals : 1.28934e4 347.18340

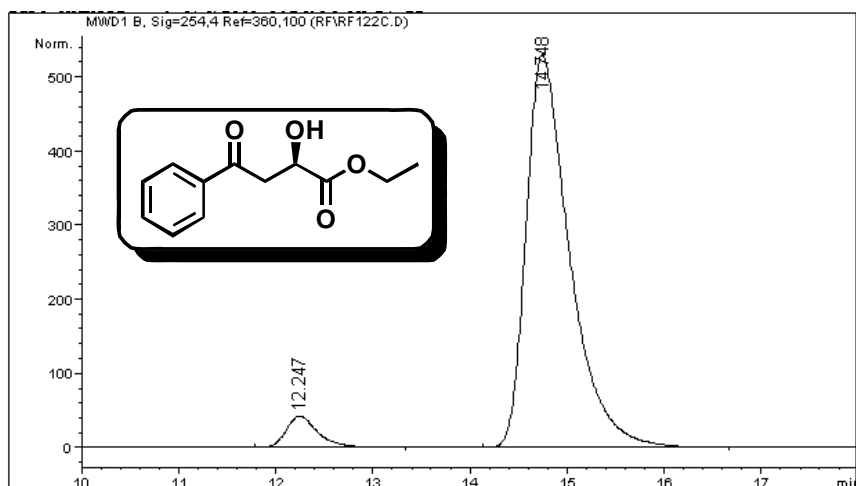

Signal 1: MWD1 B, Sig=254,4 Ref=360,100

| Peak # | RetTime [min] | Type | Width [min] | Area [mAU*s] | Height [mAU] | Area %  |
|--------|---------------|------|-------------|--------------|--------------|---------|
| 1      | 12.247        | BB   | 0.3419      | 958.43781    | 42.06037     | 5.4860  |
| 2      | 14.748        | BB   | 0.4658      | 1.65121e4    | 529.54504    | 94.5140 |

Totals : 1.74706e4 571.60541

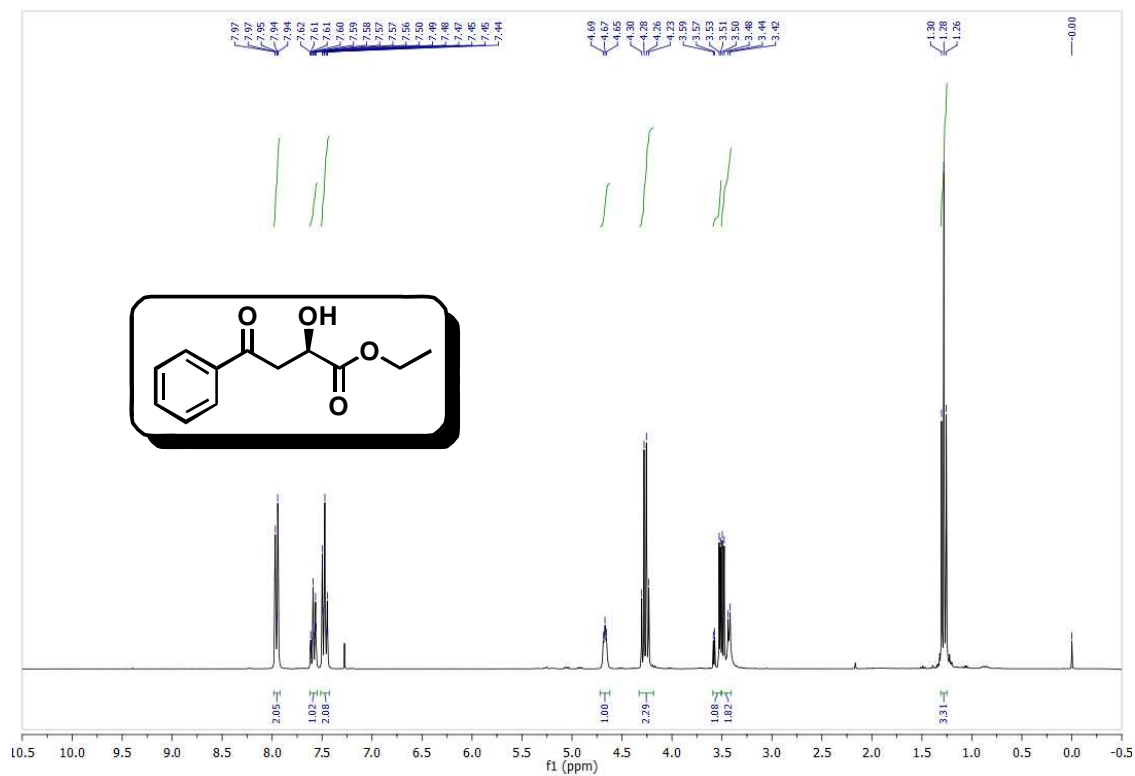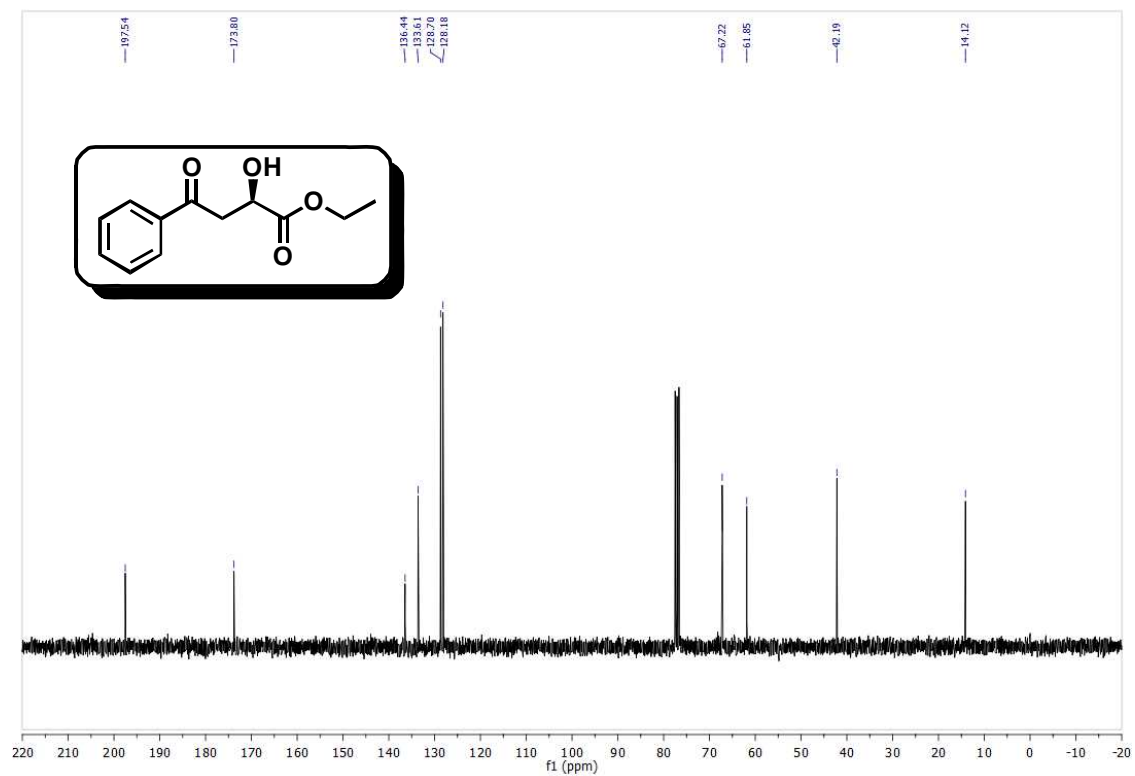

**(R)-n-butyl 2-hydroxy-4-oxo-4-phenylbutanoate**

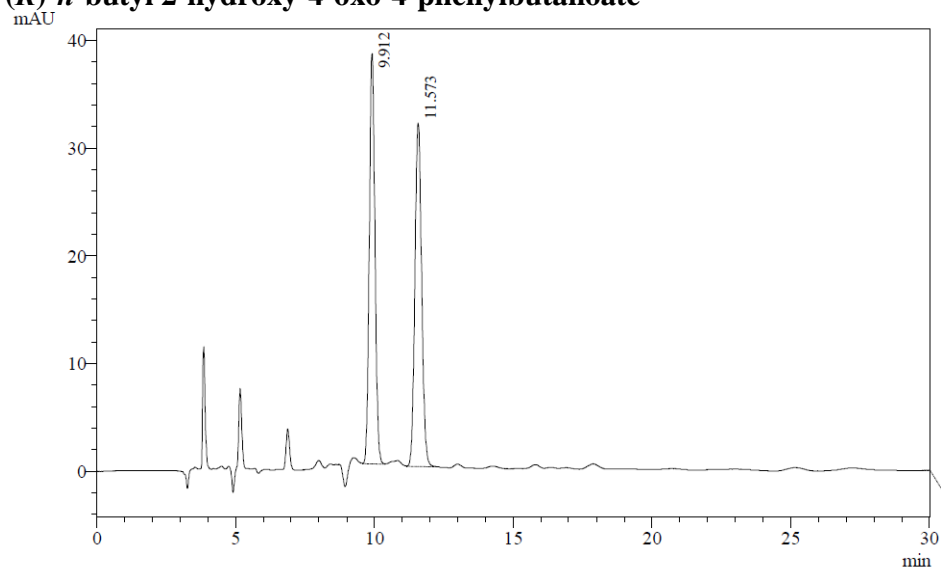

PDA Ch1 254nm 4mm

| Peak# | Ret. Time | Area    | Area %  |
|-------|-----------|---------|---------|
| 1     | 9.912     | 541073  | 49.966  |
| 2     | 11.573    | 541811  | 50.034  |
| Total |           | 1082884 | 100.000 |

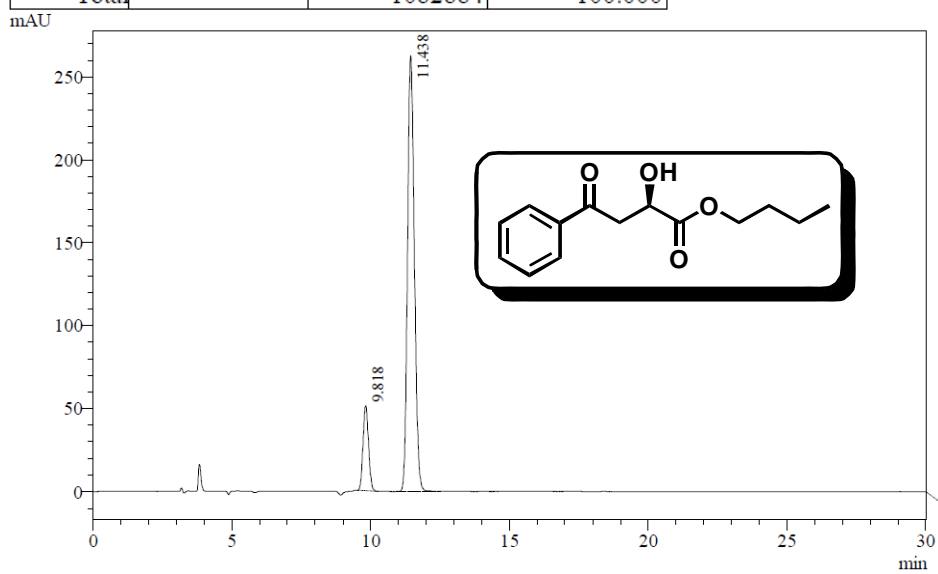

PDA Ch1 254nm 4mm

| Peak# | Ret. Time | Area    | Area %  |
|-------|-----------|---------|---------|
| 1     | 9.818     | 710667  | 13.601  |
| 2     | 11.438    | 4514339 | 86.399  |
| Total |           | 5225006 | 100.000 |

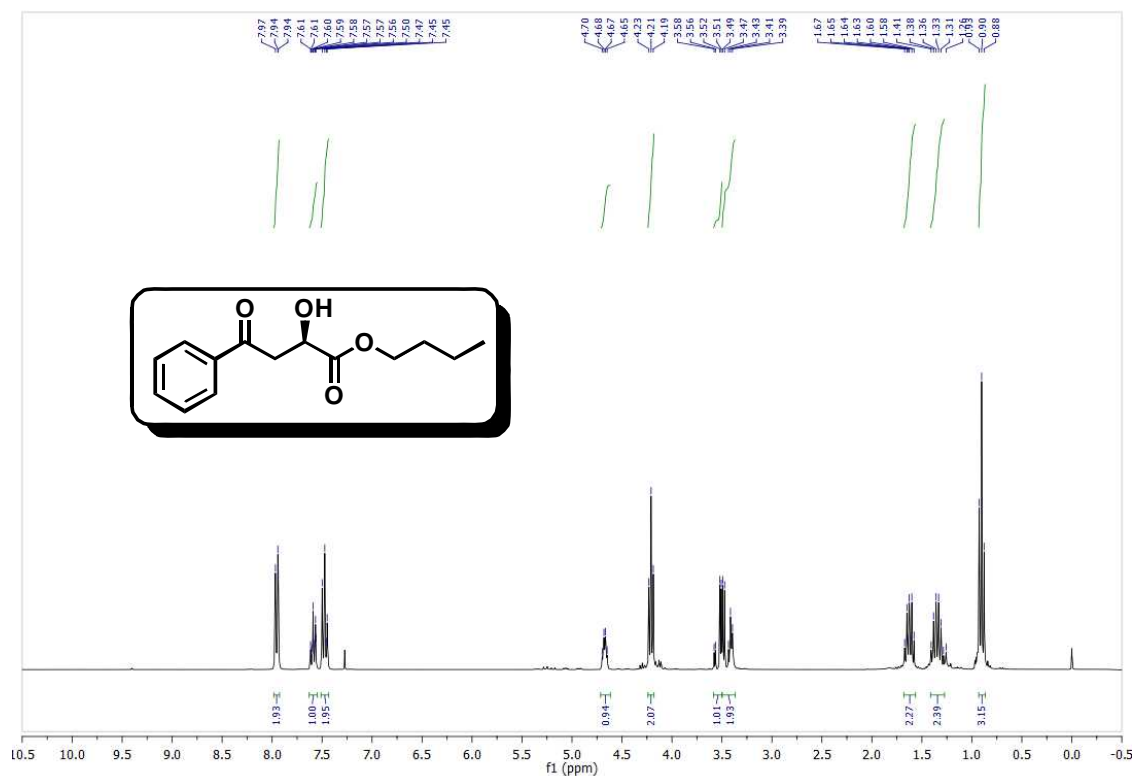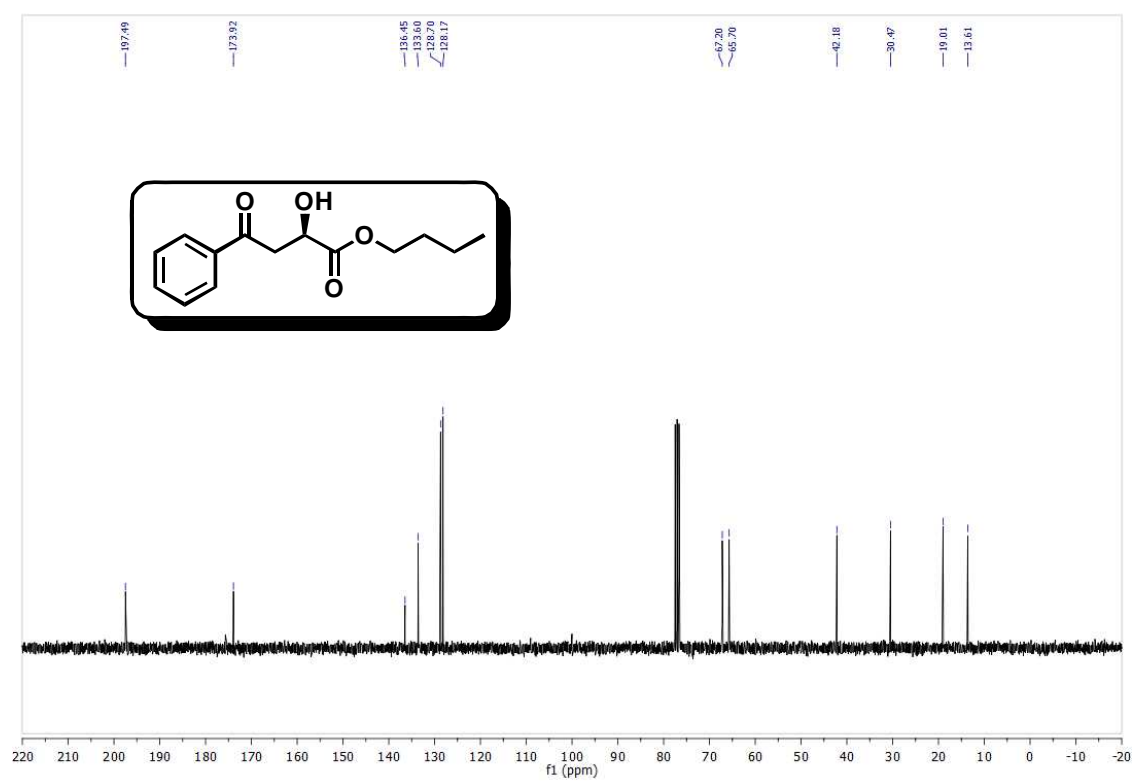

### (R)-isopropyl 2-hydroxy-4-oxo-4-phenylbutanoate

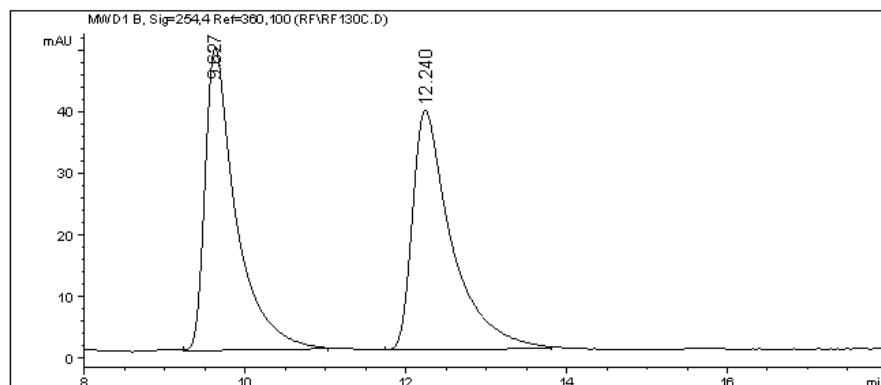

Signal 1: MWD1 B, Sig=254,4 Ref=360,100

| Peak # | RetTime [min] | Type | Width [min] | Area [mAU*s] | Height [mAU] | Area %  |
|--------|---------------|------|-------------|--------------|--------------|---------|
| 1      | 9.627         | BV   | 0.3833      | 1311.94666   | 49.16859     | 49.8901 |
| 2      | 12.240        | VV   | 0.4816      | 1317.72925   | 38.85968     | 50.1099 |

Totals : 2629.67590 88.02828

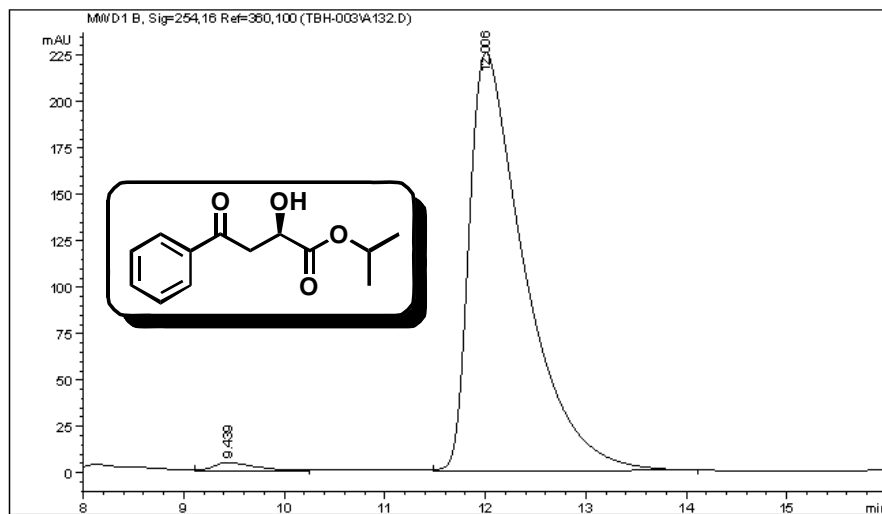

| Peak # | RetTime [min] | Type | Width [min] | Area [mAU*s] | Height [mAU] | Area %  |
|--------|---------------|------|-------------|--------------|--------------|---------|
| 1      | 9.439         | VV   | 0.4026      | 145.03171    | 4.71840      | 1.6593  |
| 2      | 12.006        | VB   | 0.5489      | 8595.38086   | 225.38782    | 98.3407 |

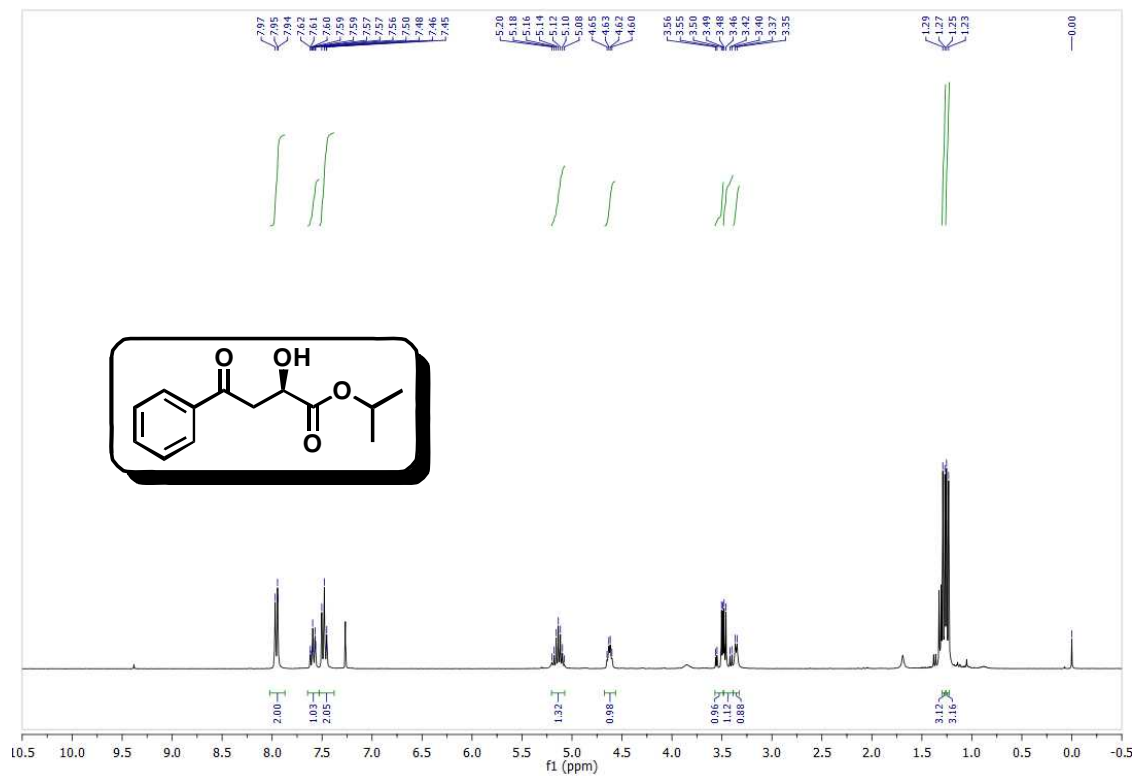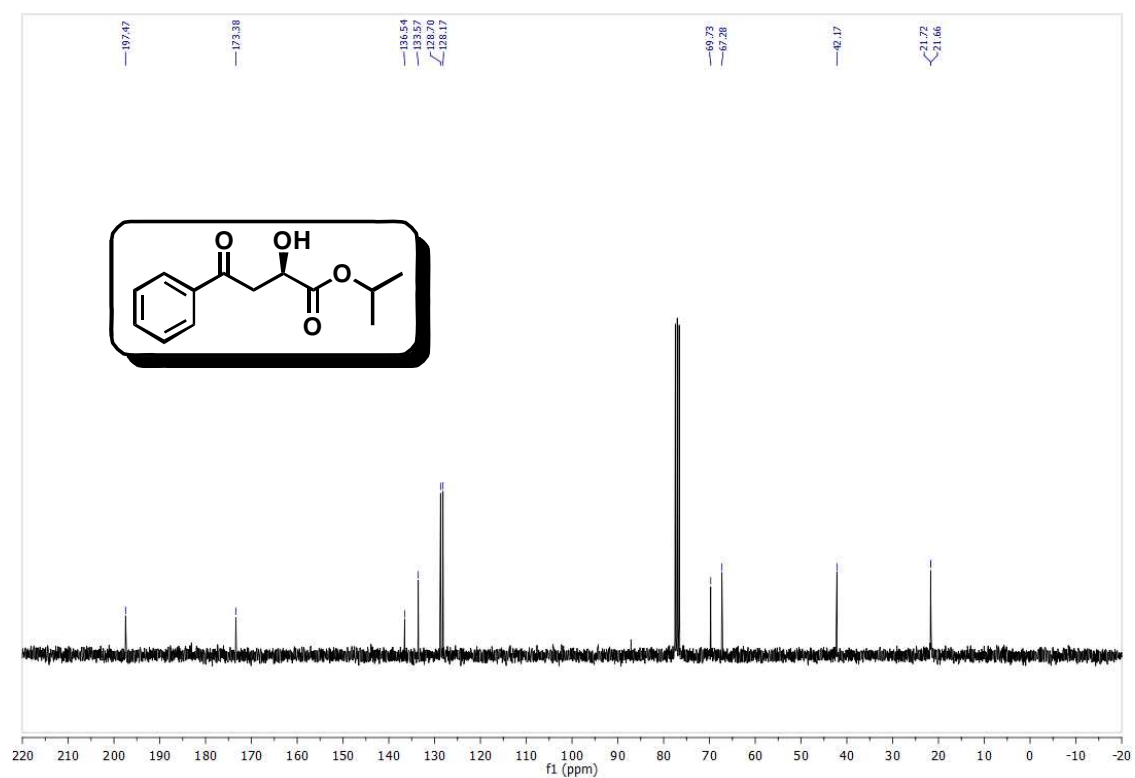



### (R)-isopropyl 2-hydroxy-4-oxo-4-o-tolylbutanoate

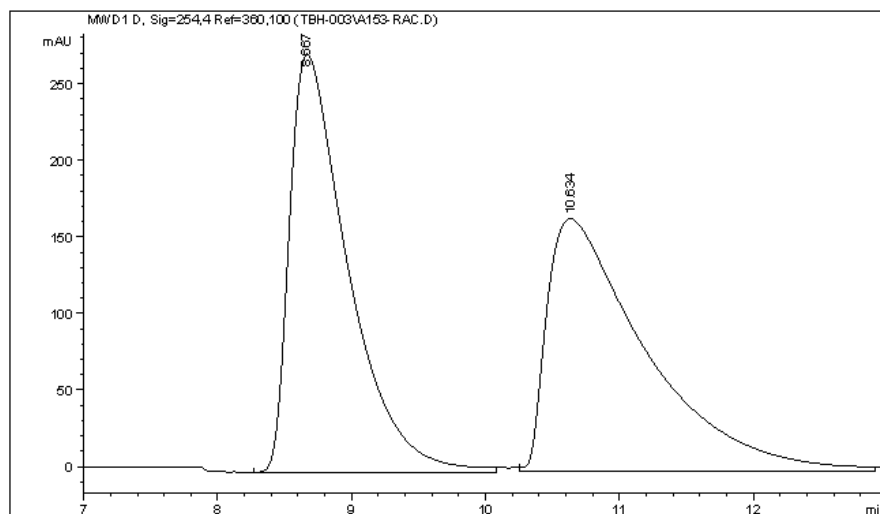

| Peak # | RetTime [min] | Type | Width [min] | Area [mAU*s] | Height [mAU] | Area %  |
|--------|---------------|------|-------------|--------------|--------------|---------|
| 1      | 8.667         | VV   | 0.4405      | 8249.48340   | 273.00421    | 49.3613 |
| 2      | 10.634        | VV   | 0.7157      | 8462.95605   | 165.18712    | 50.6387 |

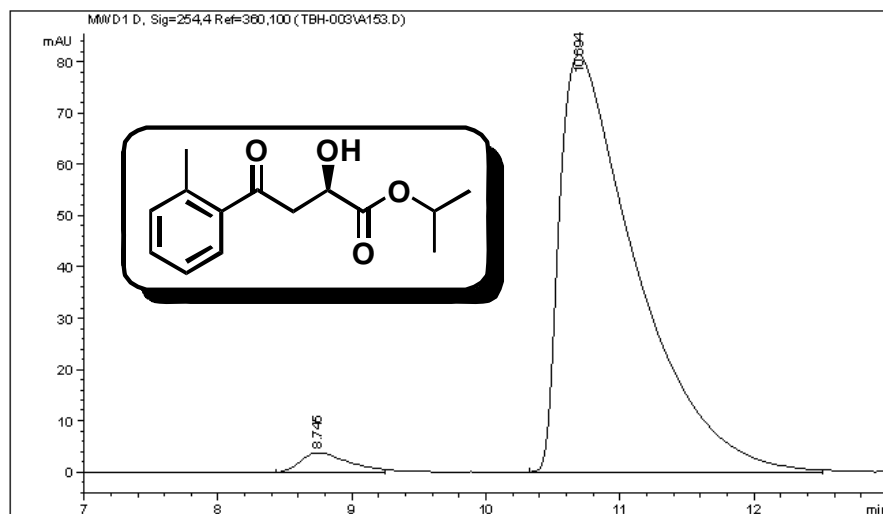

| Peak # | RetTime [min] | Type | Width [min] | Area [mAU*s] | Height [mAU] | Area %  |
|--------|---------------|------|-------------|--------------|--------------|---------|
| 1      | 8.745         | VV   | 0.3214      | 101.26785    | 3.94666      | 2.9958  |
| 2      | 10.694        | VV   | 0.5818      | 3279.05957   | 81.77115     | 97.0042 |

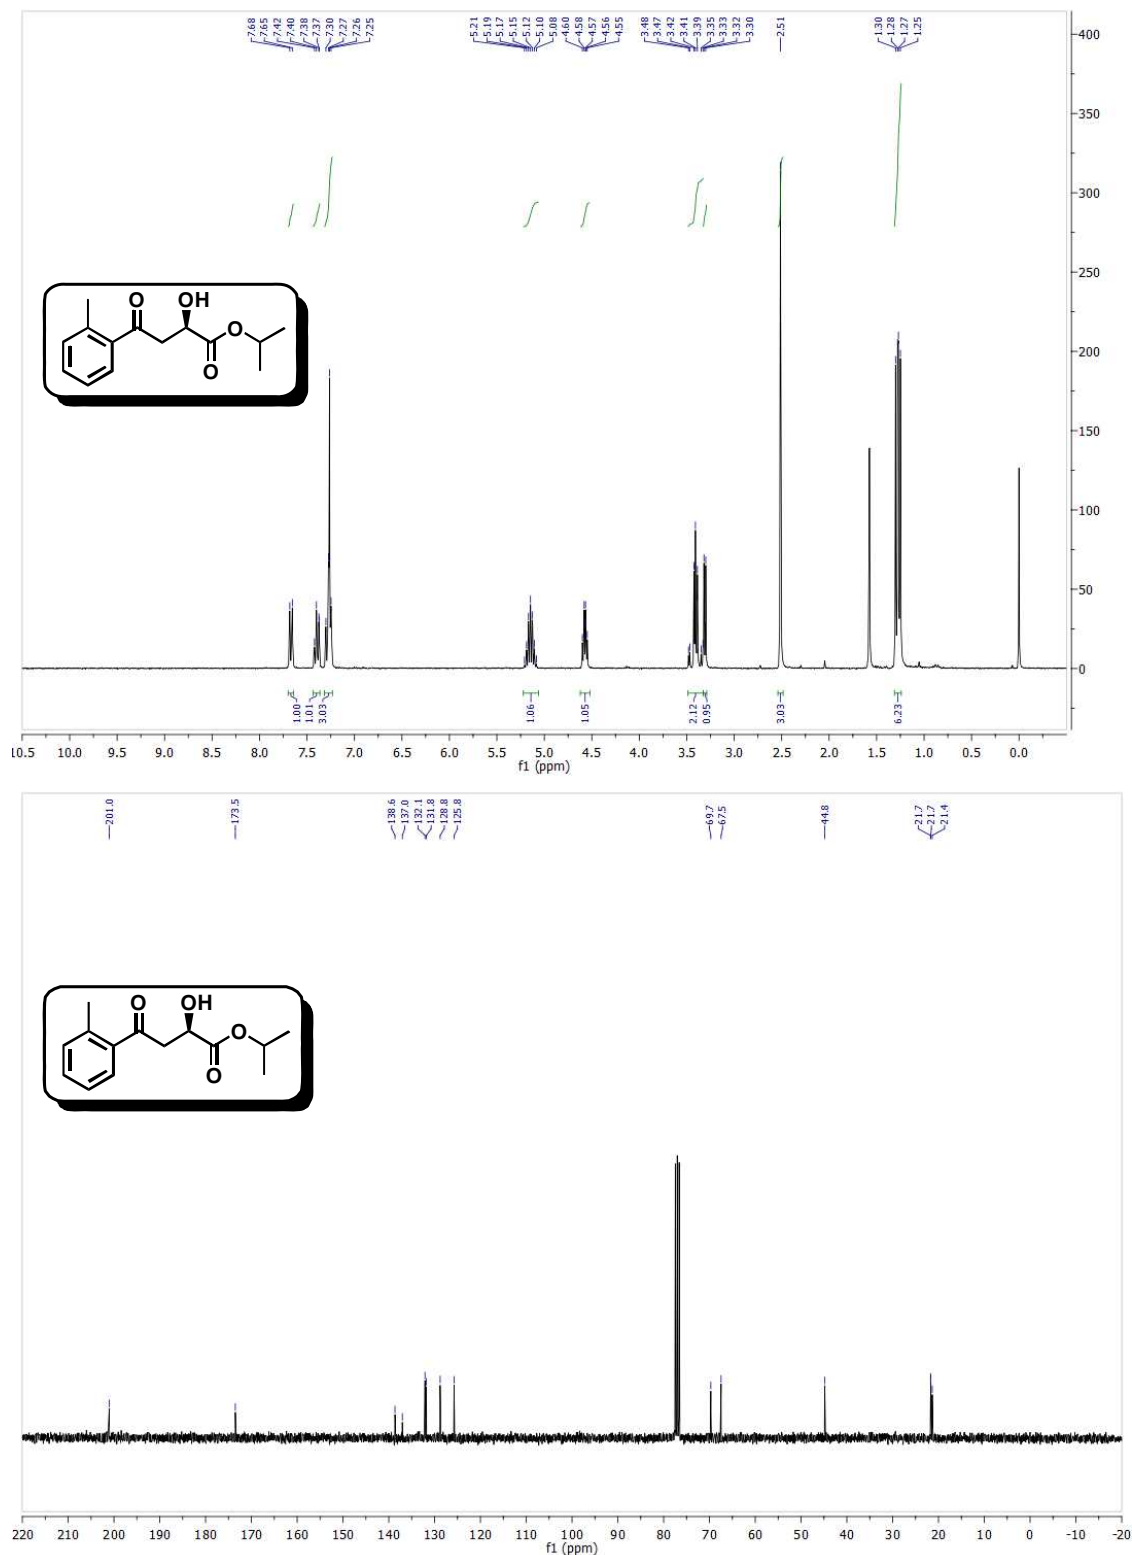

**(R)-isopropyl 2-hydroxy-4-oxo-4-m-tolylbutanoate**

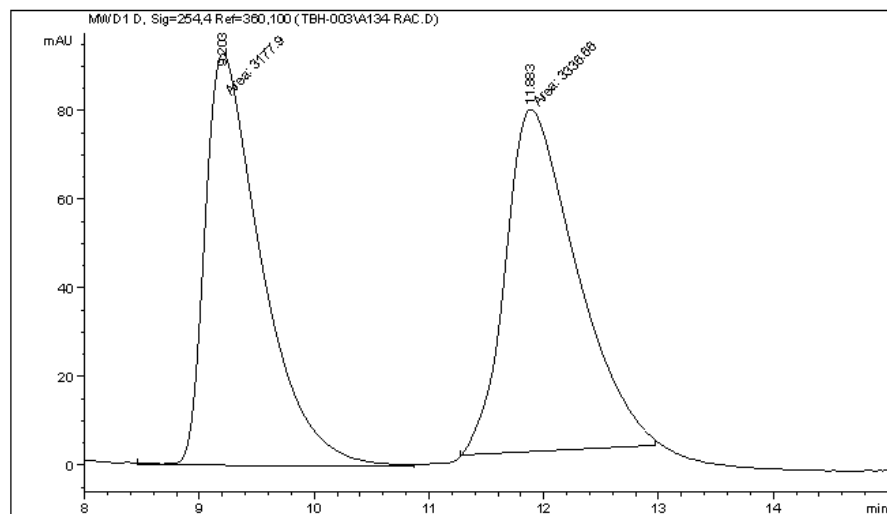

| Peak # | RetTime [min] | Type | Width [min] | Area [mAU*s] | Height [mAU] | Area %  |
|--------|---------------|------|-------------|--------------|--------------|---------|
| 1      | 9.203         | MM   | 0.5699      | 3177.89648   | 92.93600     | 48.7815 |
| 2      | 11.883        | MM   | 0.7197      | 3336.65967   | 77.26497     | 51.2185 |

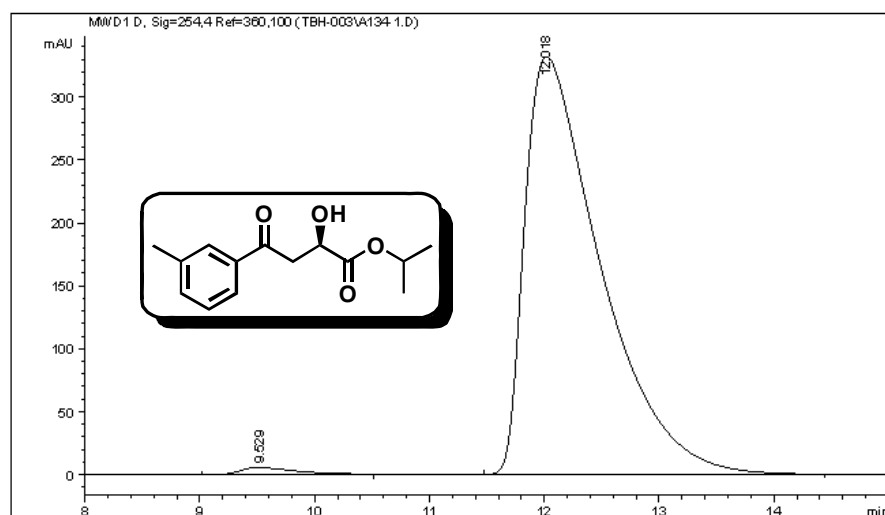

| Peak # | RetTime [min] | Type | Width [min] | Area [mAU*s] | Height [mAU] | Area %  |
|--------|---------------|------|-------------|--------------|--------------|---------|
| 1      | 9.529         | VV   | 0.4553      | 217.03958    | 5.89837      | 1.4030  |
| 2      | 12.018        | VV   | 0.6757      | 1.52526e4    | 332.18802    | 98.5970 |

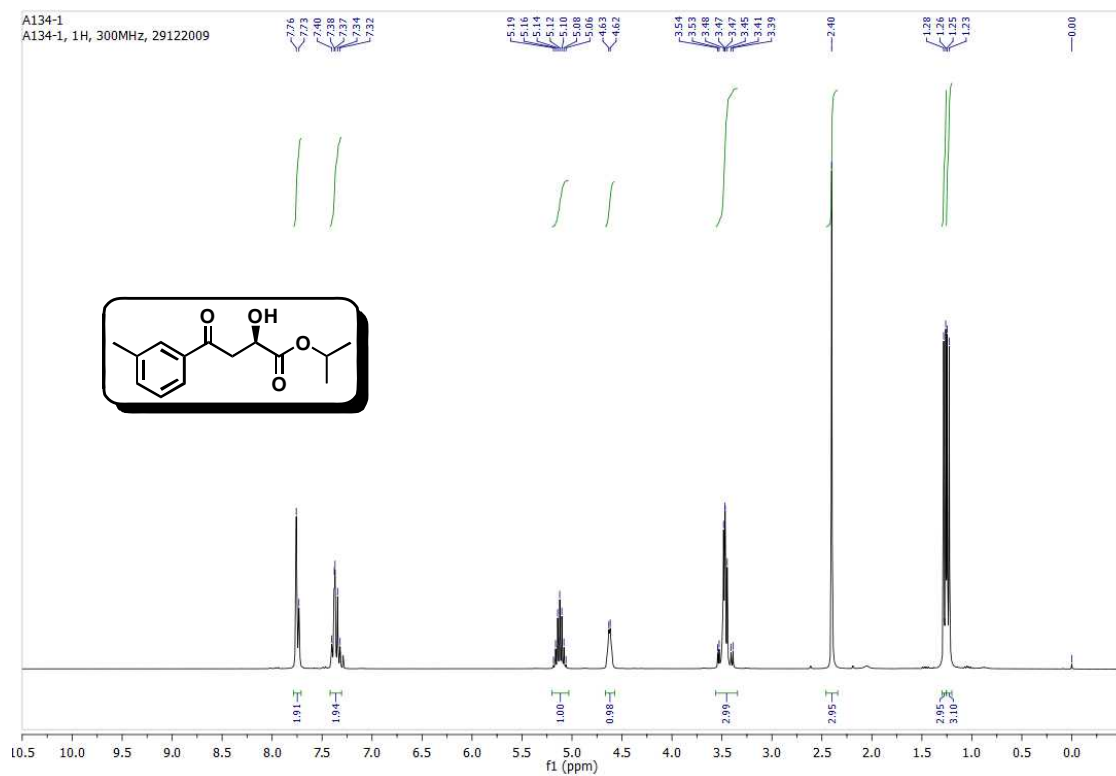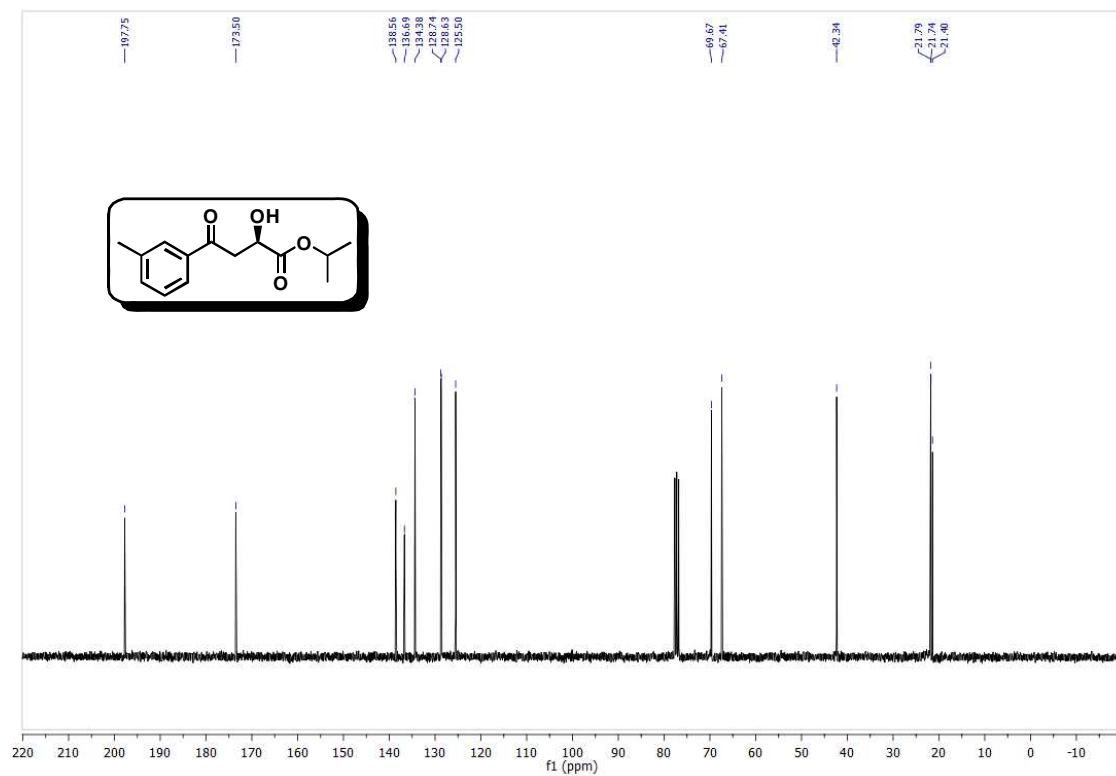

**(R)-isopropyl 2-hydroxy-4-oxo-4-p-tolylbutanoate**

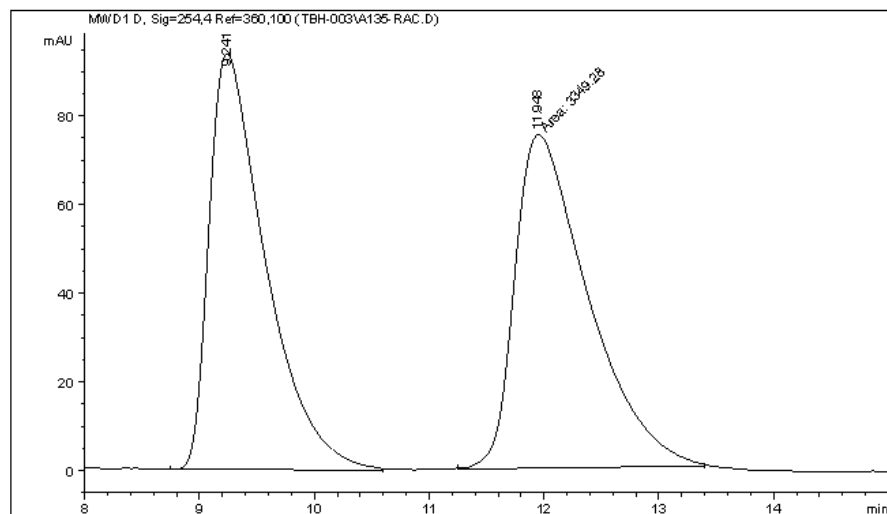

| Peak # | RetTime [min] | Type | Width [min] | Area [mAU*s] | Height [mAU] | Area %  |
|--------|---------------|------|-------------|--------------|--------------|---------|
| 1      | 9.241         | BV   | 0.4967      | 3206.66479   | 93.84001     | 48.9123 |
| 2      | 11.948        | MM   | 0.7423      | 3349.28467   | 75.20341     | 51.0877 |

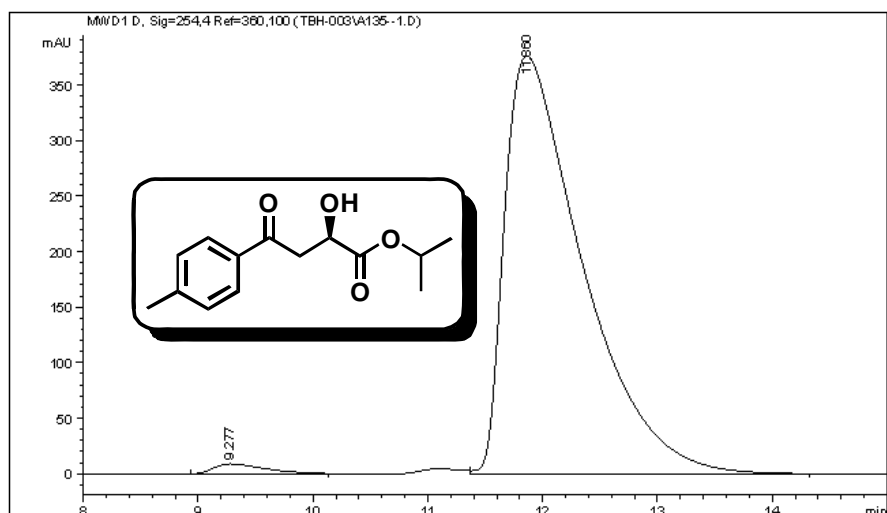

| Peak # | RetTime [min] | Type | Width [min] | Area [mAU*s] | Height [mAU] | Area %  |
|--------|---------------|------|-------------|--------------|--------------|---------|
| 1      | 9.277         | VV   | 0.4497      | 315.47281    | 9.44523      | 1.7345  |
| 2      | 11.860        | VV   | 0.6933      | 1.78729e4    | 376.88269    | 98.2655 |

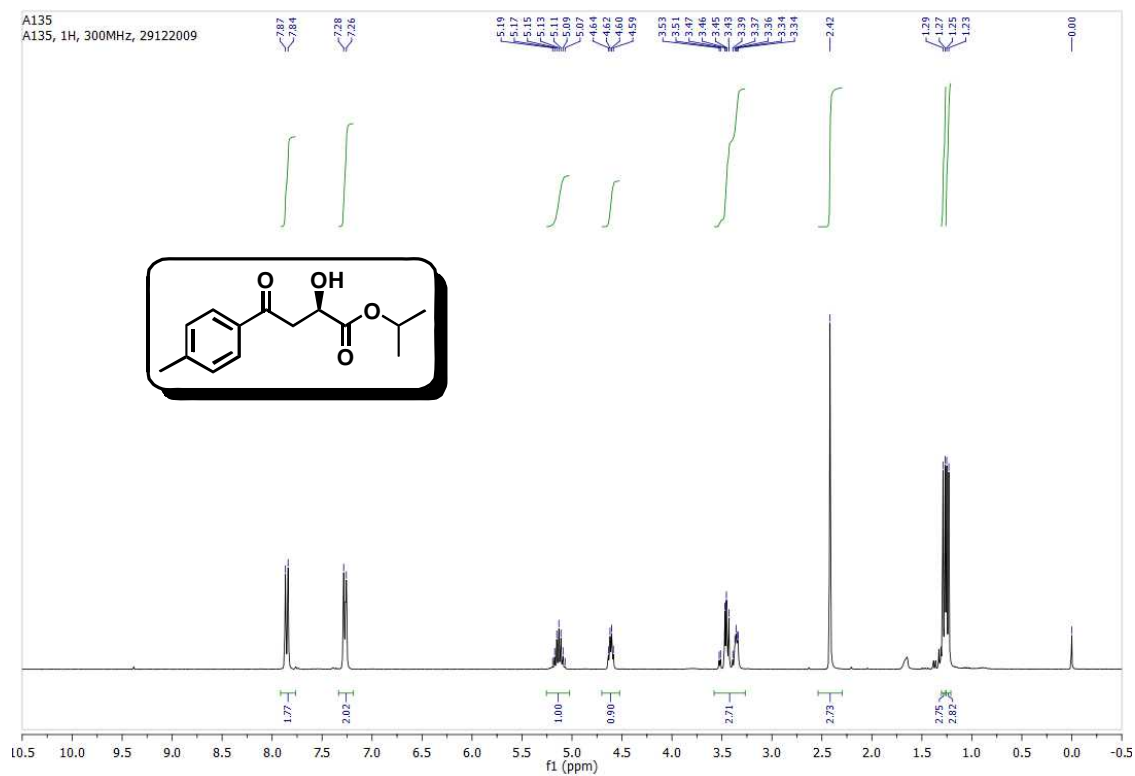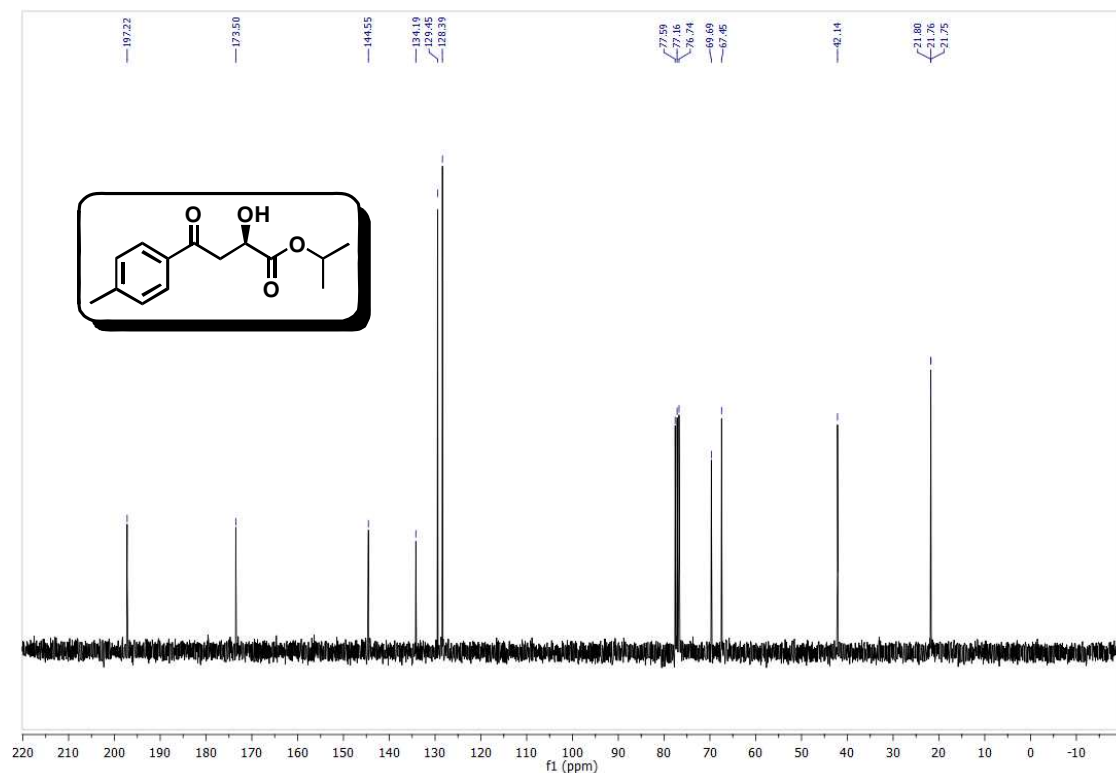

**(R)-isopropyl 4-(2,4-dimethylphenyl)-2-hydroxy-4-oxobutanoate**

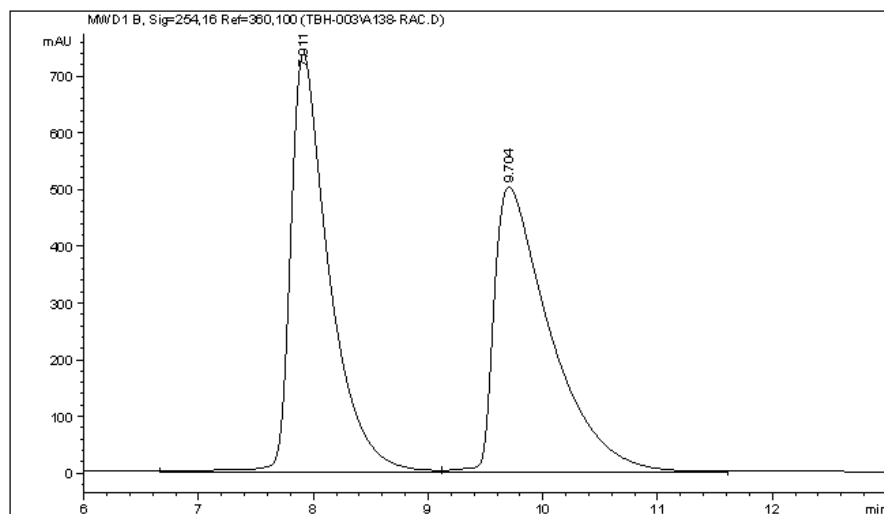

| Peak # | RetTime [min] | Type | Width [min] | Area [mAU*s] | Height [mAU] | Area %  |
|--------|---------------|------|-------------|--------------|--------------|---------|
| 1      | 7.911         | VV   | 0.3402      | 1.71972e4    | 737.16748    | 50.3130 |
| 2      | 9.704         | VB   | 0.4943      | 1.69832e4    | 502.55173    | 49.6870 |

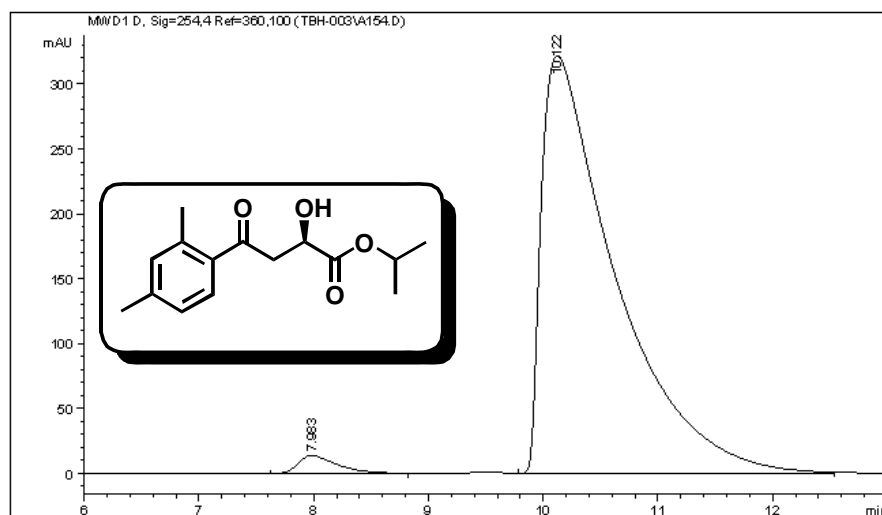

| Peak # | RetTime [min] | Type | Width [min] | Area [mAU*s] | Height [mAU] | Area %  |
|--------|---------------|------|-------------|--------------|--------------|---------|
| 1      | 7.983         | VV   | 0.3401      | 336.24344    | 14.00418     | 2.2734  |
| 2      | 10.122        | VV   | 0.6354      | 1.44542e4    | 322.21100    | 97.7266 |

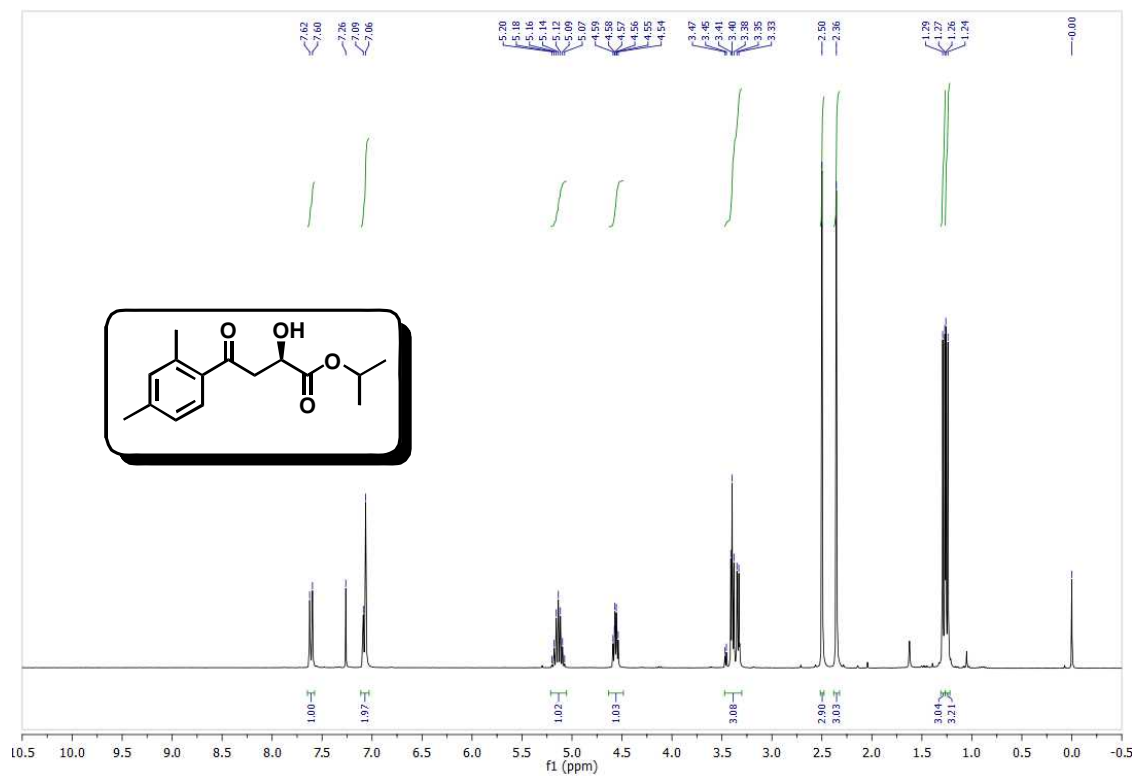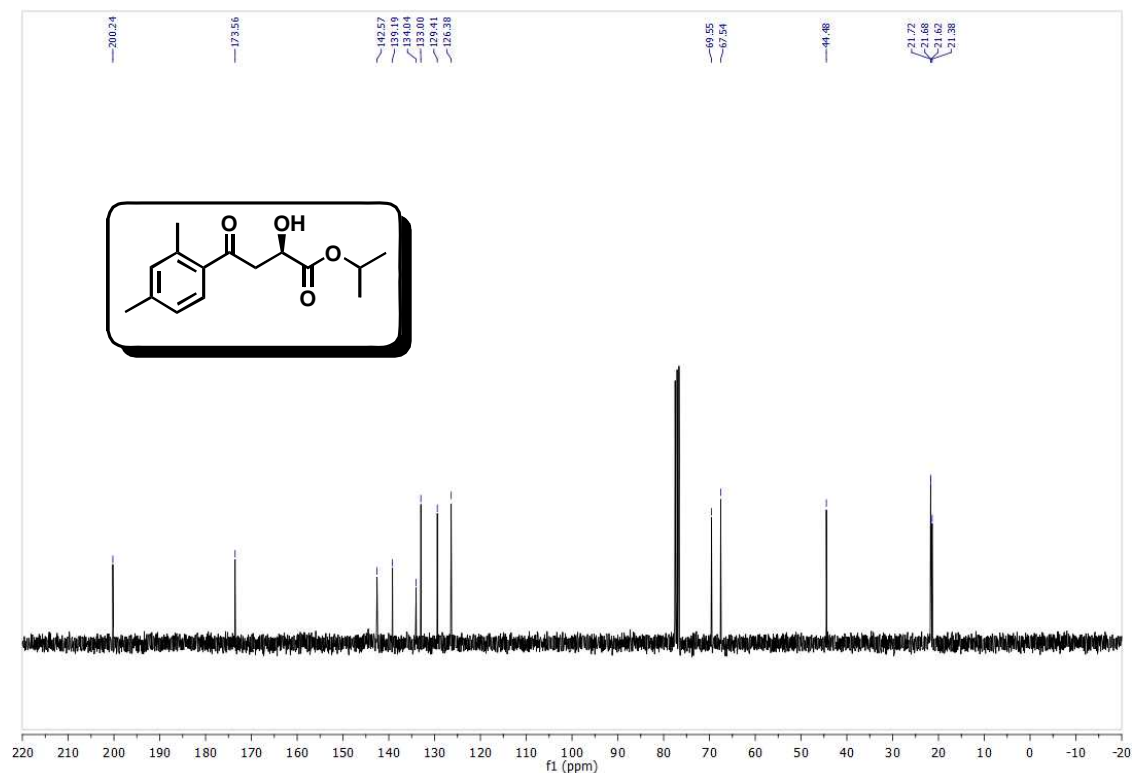

**(R)-isopropyl 4-(2-fluorophenyl)-2-hydroxy-4-oxobutanoate**



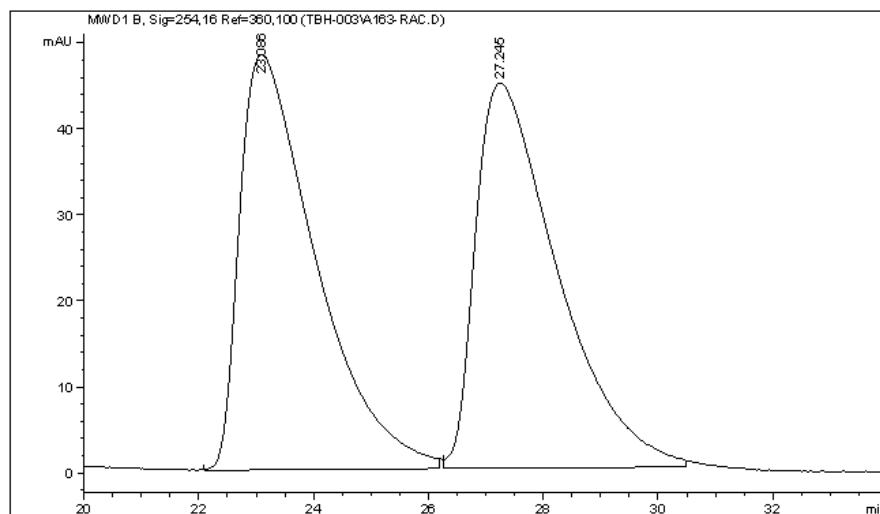

| Peak # | RetTime [min] | Type | Width [min] | Area [mAU*s] | Height [mAU] | Area %  |
|--------|---------------|------|-------------|--------------|--------------|---------|
| 1      | 23.086        | VB   | 1.0890      | 4444.06104   | 48.31876     | 49.9838 |
| 2      | 27.245        | VV   | 1.1781      | 4446.94336   | 44.80021     | 50.0162 |

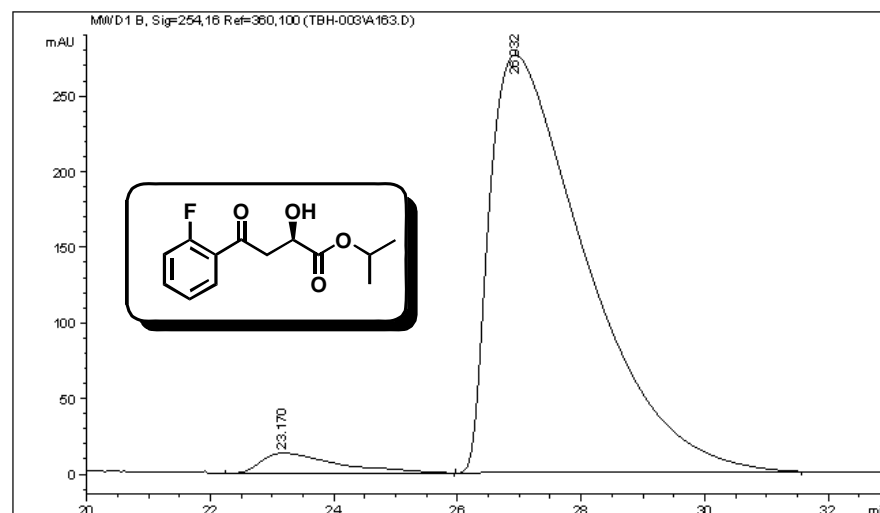

| Peak # | RetTime [min] | Type | Width [min] | Area [mAU*s] | Height [mAU] | Area %  |
|--------|---------------|------|-------------|--------------|--------------|---------|
| 1      | 23.170        | VB   | 1.0057      | 1146.05322   | 13.37496     | 3.6858  |
| 2      | 26.932        | BB   | 1.4913      | 2.99479e4    | 276.13535    | 96.3142 |

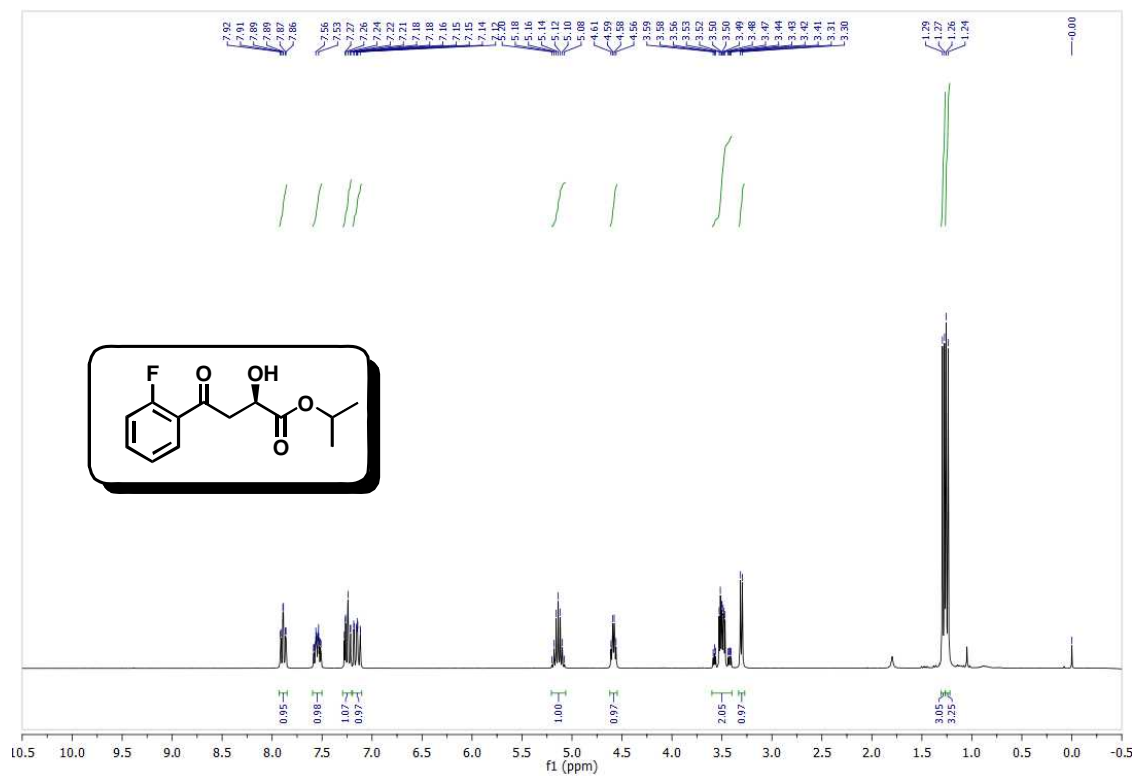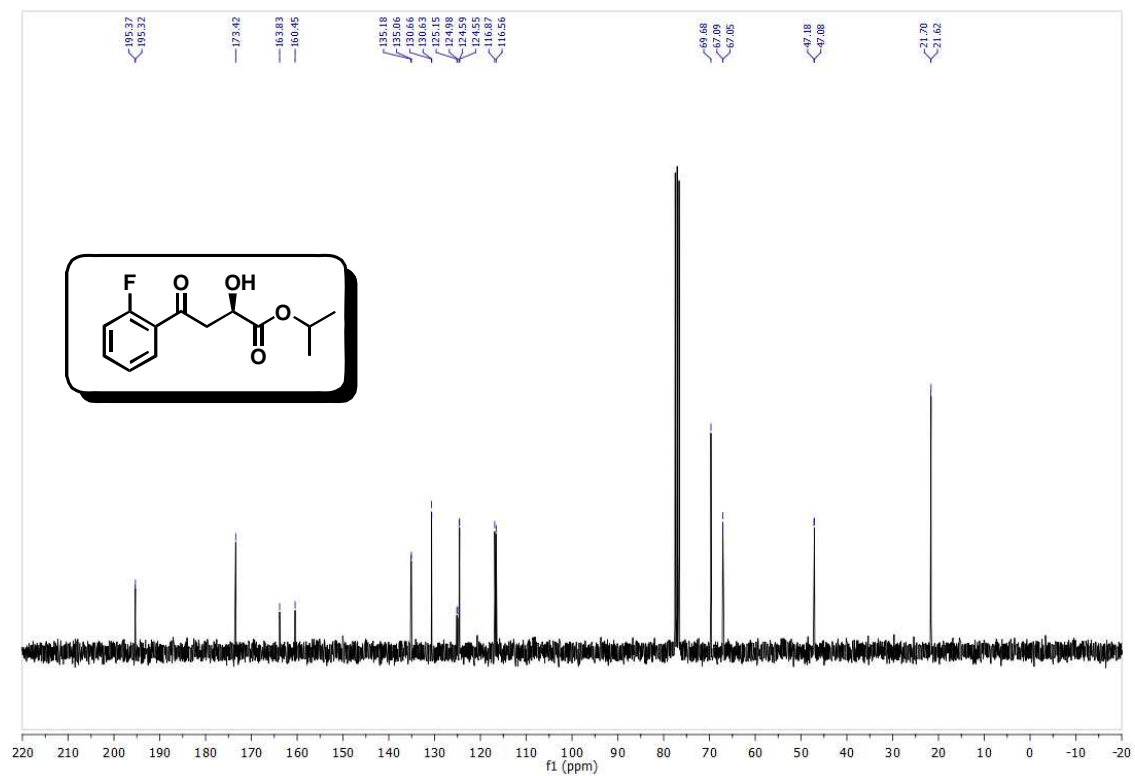

**(R)-isopropyl 4-(3-fluorophenyl)-2-hydroxy-4-oxobutanoate**

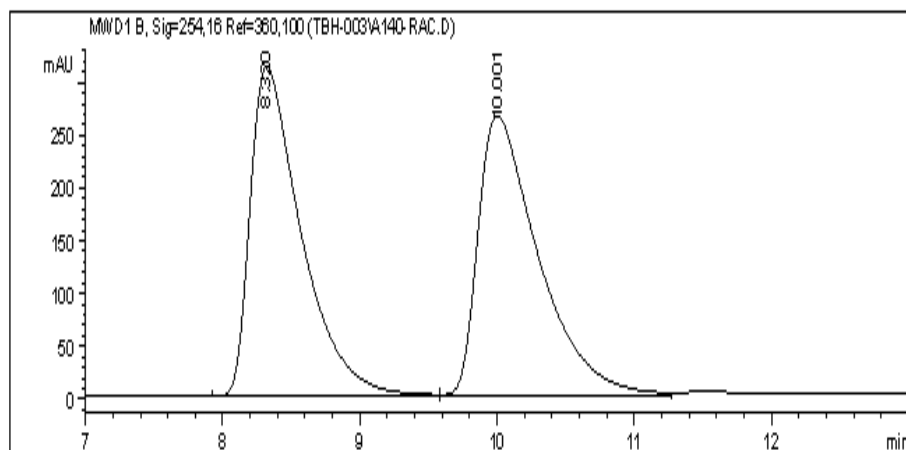

| Peak # | RetTime [min] | Type | Width [min] | Area [mAU*s] | Height [mAU] | Area %  |
|--------|---------------|------|-------------|--------------|--------------|---------|
| 1      | 8.320         | VV   | 0.3857      | 8083.31787   | 312.55811    | 49.9240 |
| 2      | 10.001        | VV   | 0.4524      | 8107.93115   | 265.40823    | 50.0760 |

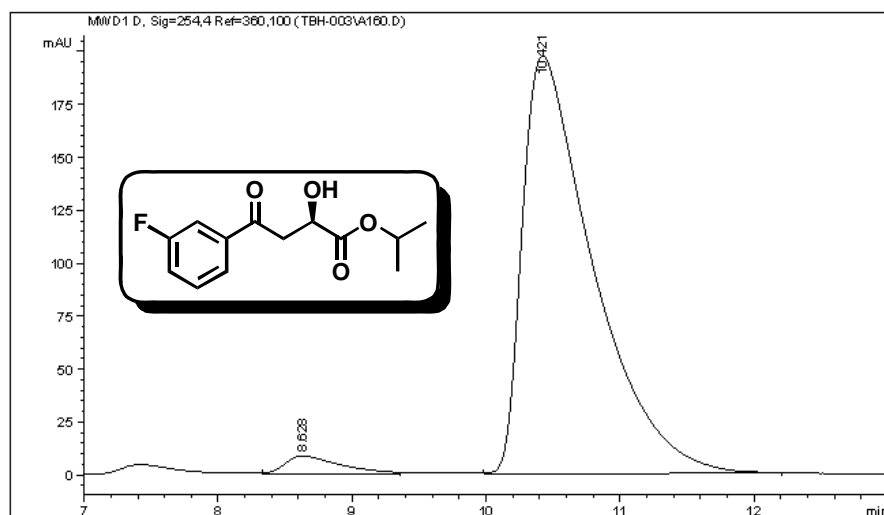

| Peak # | RetTime [min] | Type | Width [min] | Area [mAU*s] | Height [mAU] | Area %  |
|--------|---------------|------|-------------|--------------|--------------|---------|
| 1      | 8.628         | VV   | 0.3694      | 247.21349    | 8.60011      | 3.3026  |
| 2      | 10.421        | VV   | 0.5380      | 7238.12500   | 197.31534    | 96.6974 |

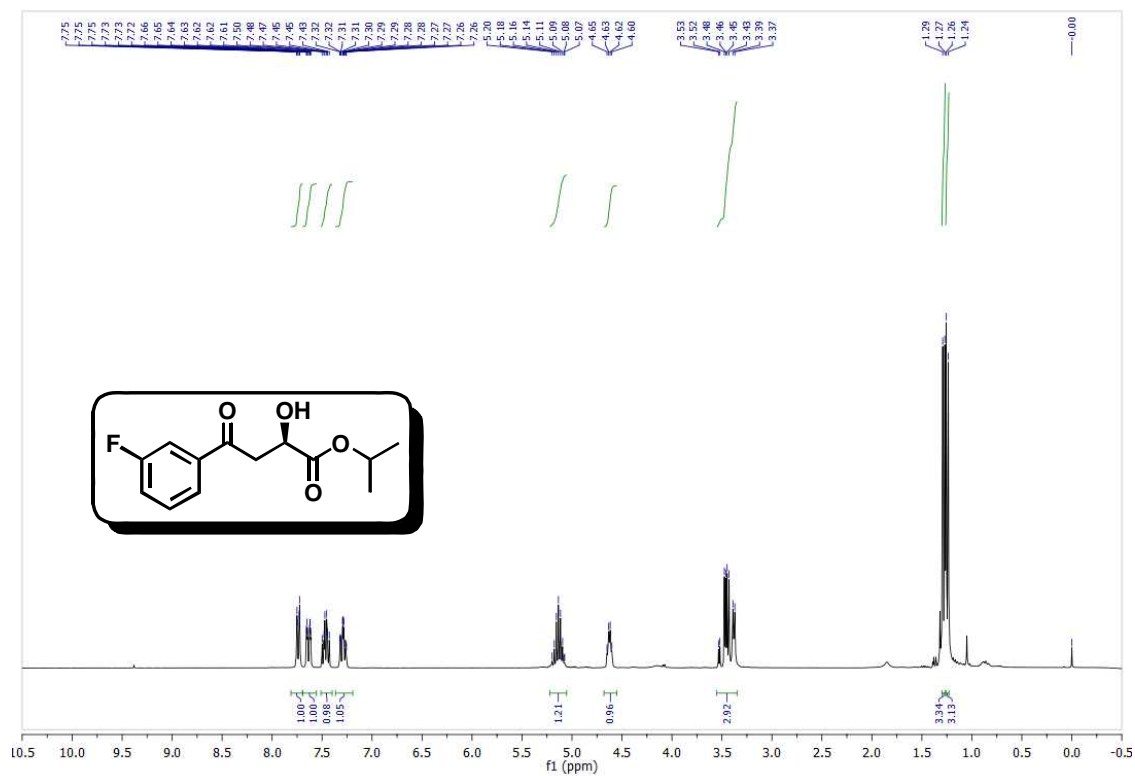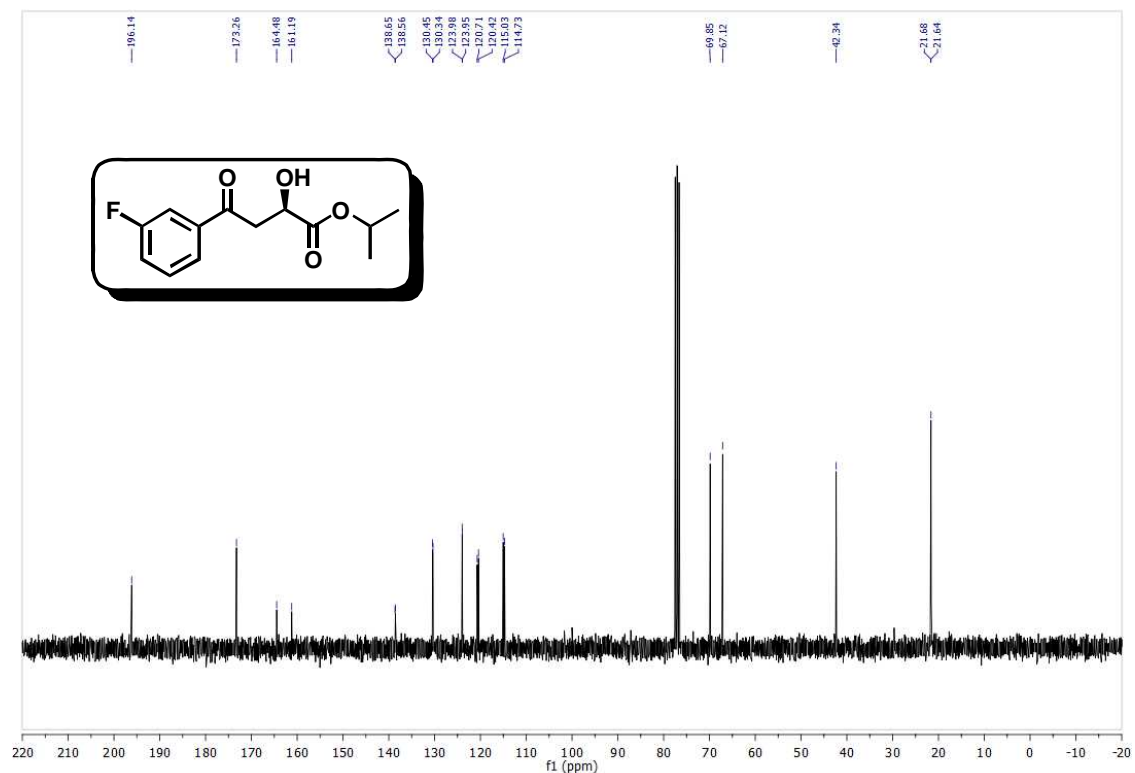

**(R)-isopropyl 4-(4-fluorophenyl)-2-hydroxy-4-oxobutanoate**

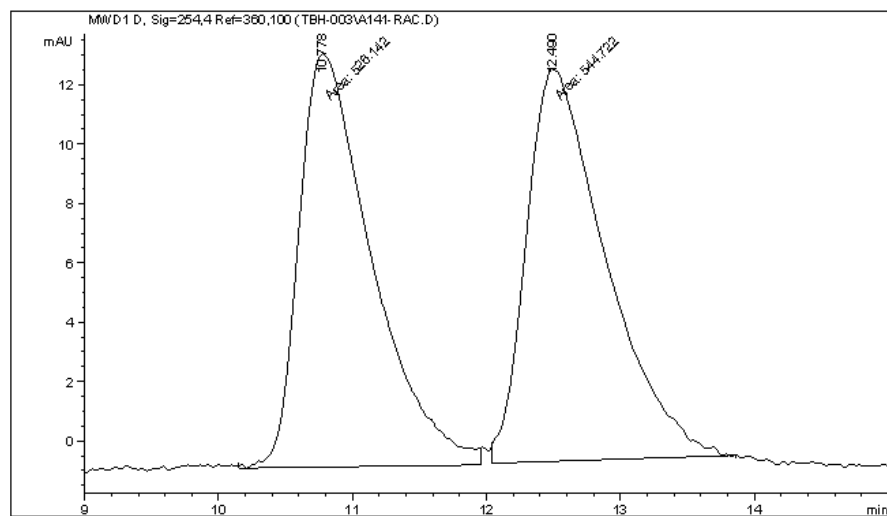

| Peak # | RetTime [min] | Type | Width [min] | Area [mAU*s] | Height [mAU] | Area %  |
|--------|---------------|------|-------------|--------------|--------------|---------|
| 1      | 10.778        | MM   | 0.6298      | 526.14166    | 13.92315     | 49.1325 |
| 2      | 12.490        | MM   | 0.6864      | 544.72186    | 13.22623     | 50.8675 |

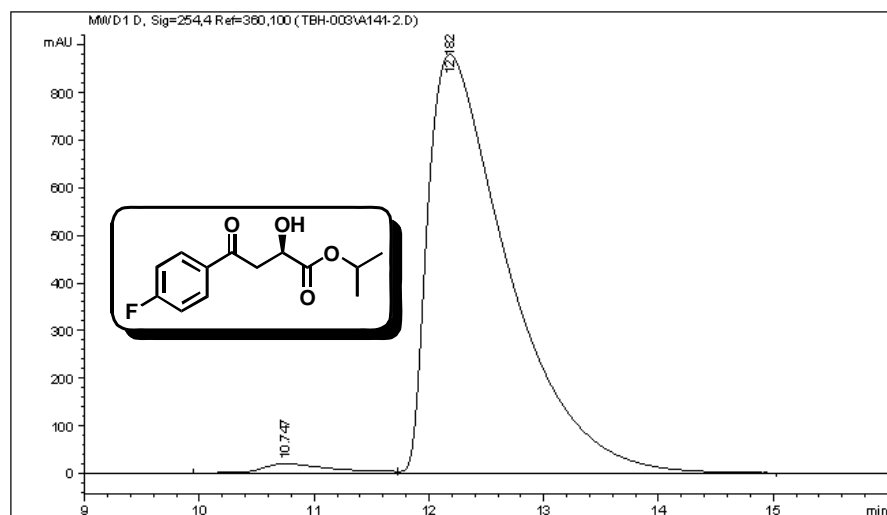

| Peak # | RetTime [min] | Type | Width [min] | Area [mAU*s] | Height [mAU] | Area %  |
|--------|---------------|------|-------------|--------------|--------------|---------|
| 1      | 10.747        | VV   | 0.5696      | 868.13147    | 19.87380     | 1.9869  |
| 2      | 12.182        | VV   | 0.6897      | 4.28256e4    | 880.05719    | 98.0131 |

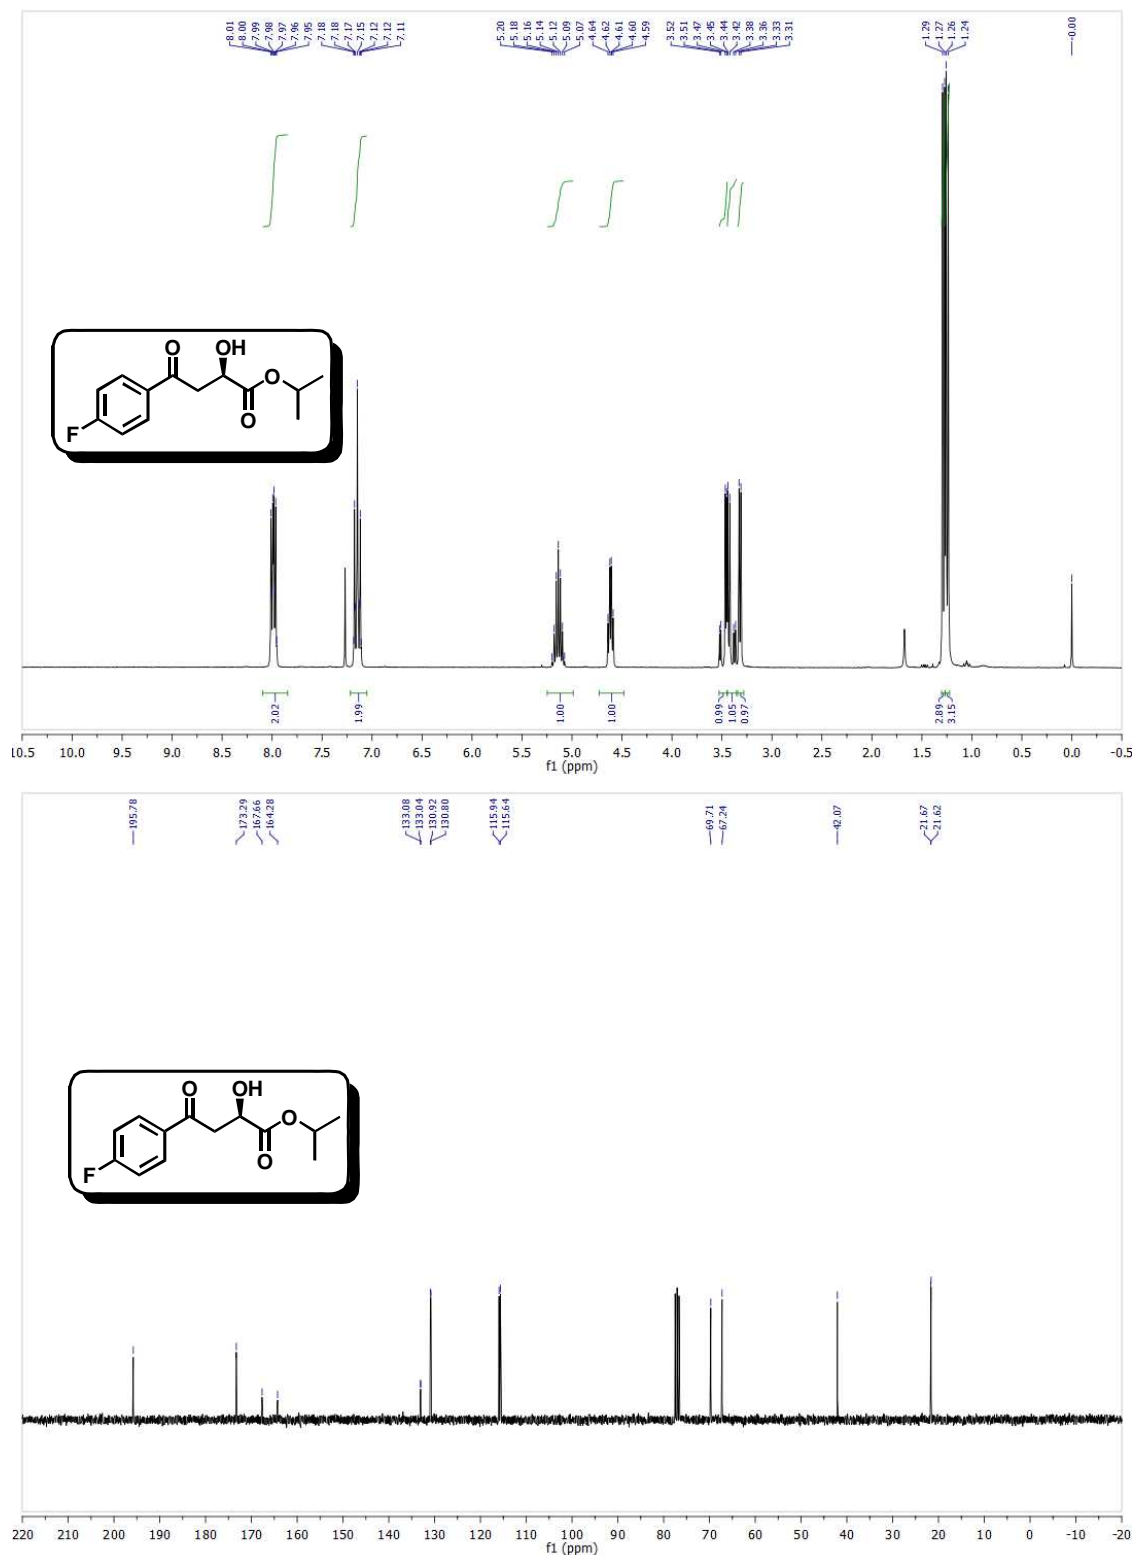

**(R)-isopropyl 4-(4-fluorophenyl)-2-hydroxy-4-oxobutanoate**

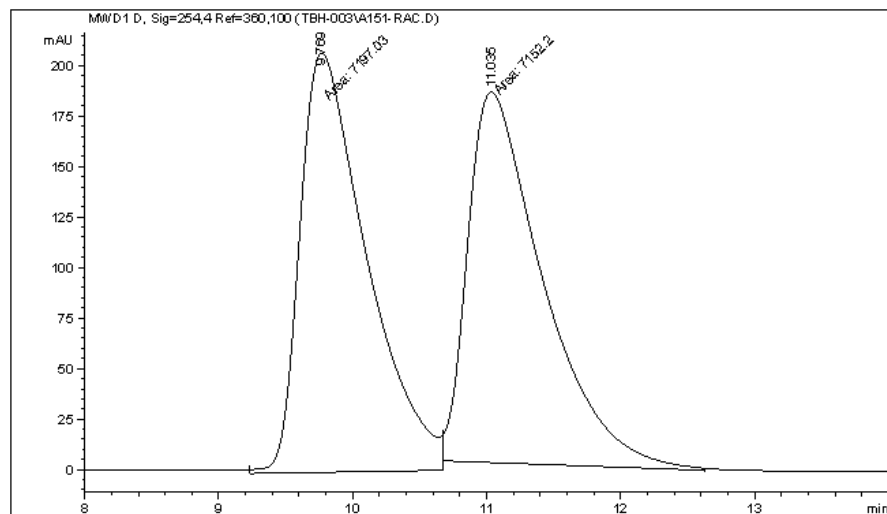

| Peak # | RetTime [min] | Type | Width [min] | Area [mAU*s] | Height [mAU] | Area %  |
|--------|---------------|------|-------------|--------------|--------------|---------|
| 1      | 9.769         | MM   | 0.5777      | 7197.03076   | 207.62784    | 50.1562 |
| 2      | 11.035        | MM   | 0.6496      | 7152.19922   | 183.48976    | 49.8438 |

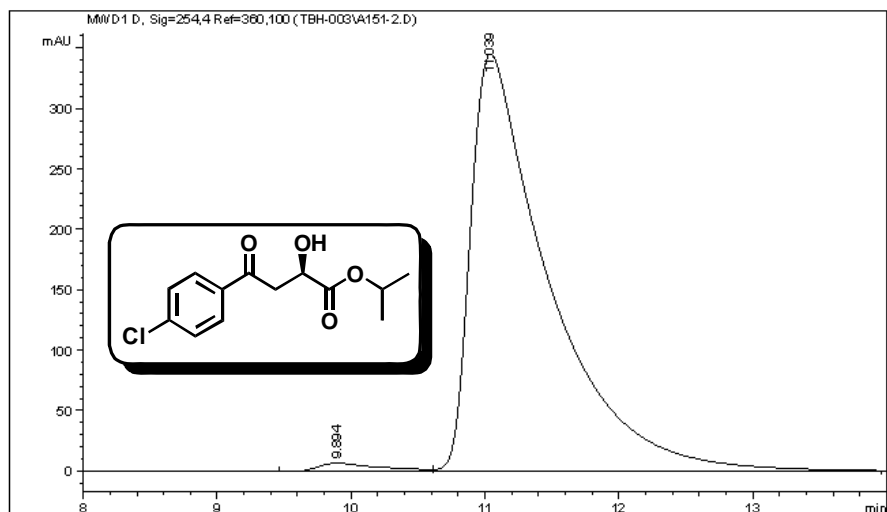

| Peak # | RetTime [min] | Type | Width [min] | Area [mAU*s] | Height [mAU] | Area %  |
|--------|---------------|------|-------------|--------------|--------------|---------|
| 1      | 9.894         | VV   | 0.3858      | 210.55847    | 6.78997      | 1.4873  |
| 2      | 11.039        | VB   | 0.5672      | 1.39463e4    | 345.27692    | 98.5127 |

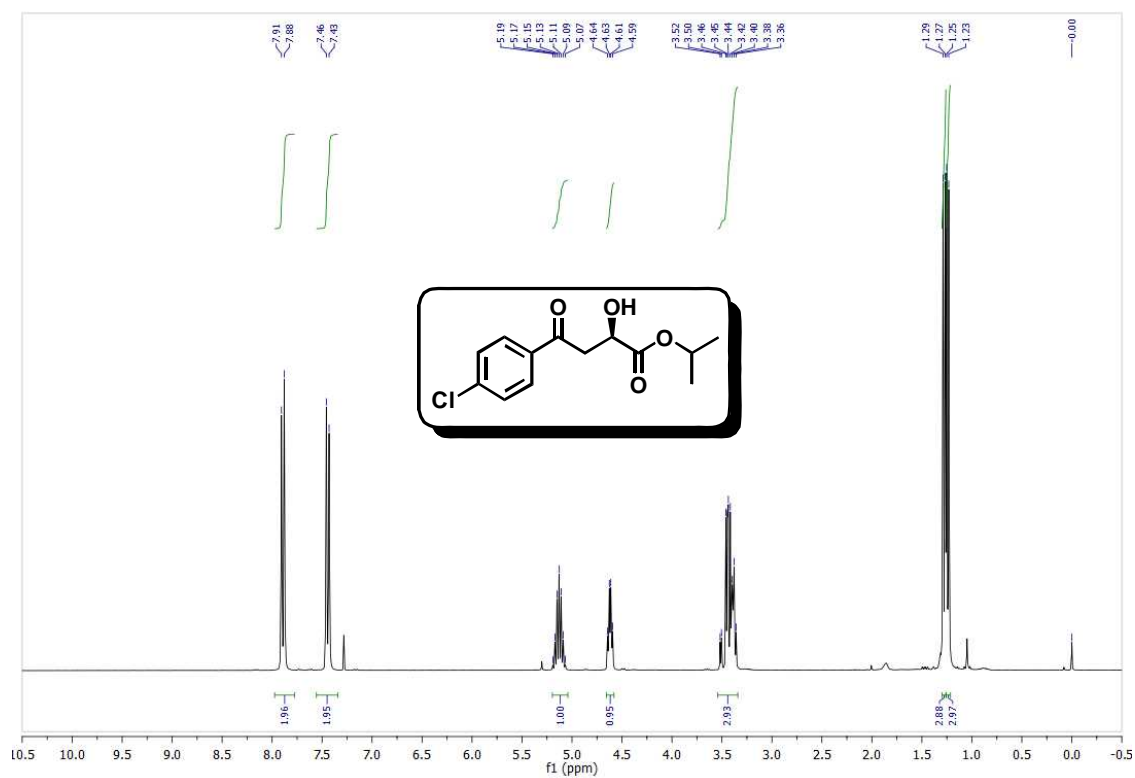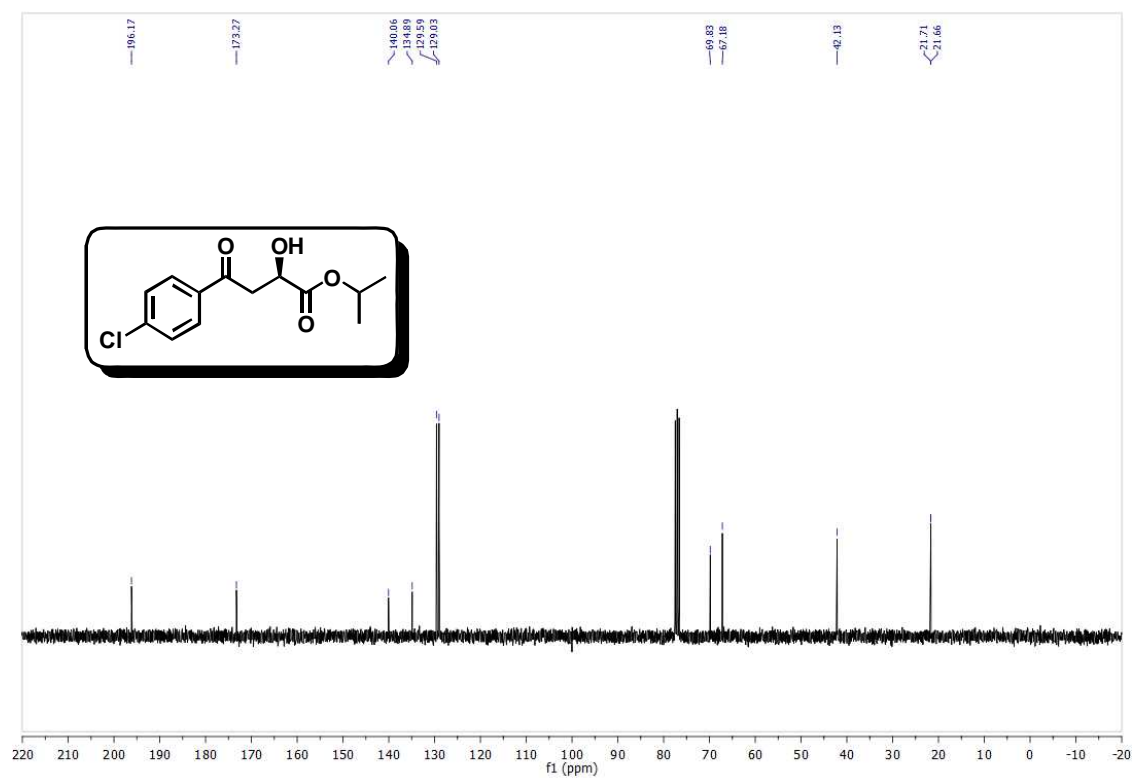

**(R)-isopropyl 4-(4-bromophenyl)-2-hydroxy-4-oxobutanoate**



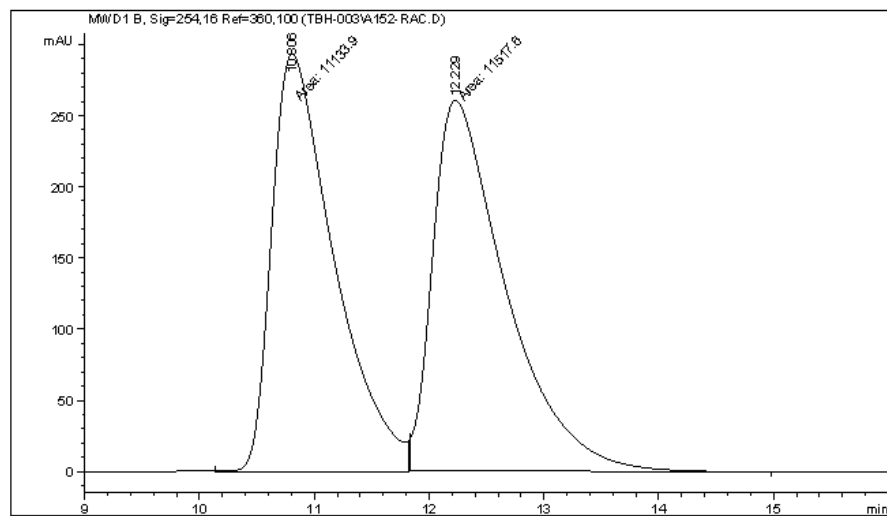

| Peak # | RetTime [min] | Type | Width [min] | Area [mAU*s] | Height [mAU] | Area %  |
|--------|---------------|------|-------------|--------------|--------------|---------|
| 1      | 10.806        | MM   | 0.6307      | 1.11339e4    | 294.24231    | 49.1532 |
| 2      | 12.229        | MM   | 0.7377      | 1.15176e4    | 260.19601    | 50.8468 |

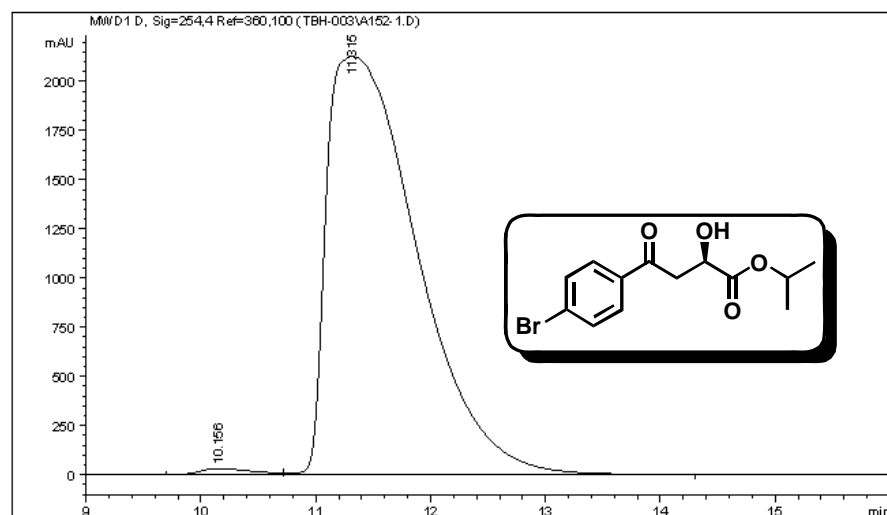

| Peak # | RetTime [min] | Type | Width [min] | Area [mAU*s] | Height [mAU] | Area %  |
|--------|---------------|------|-------------|--------------|--------------|---------|
| 1      | 10.156        | VV   | 0.4423      | 1014.92828   | 31.80775     | 0.8641  |
| 2      | 11.315        | VV   | 0.6435      | 1.16435e5    | 2130.88379   | 99.1359 |

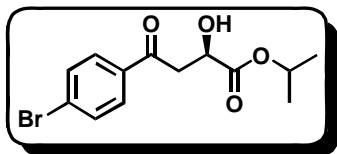

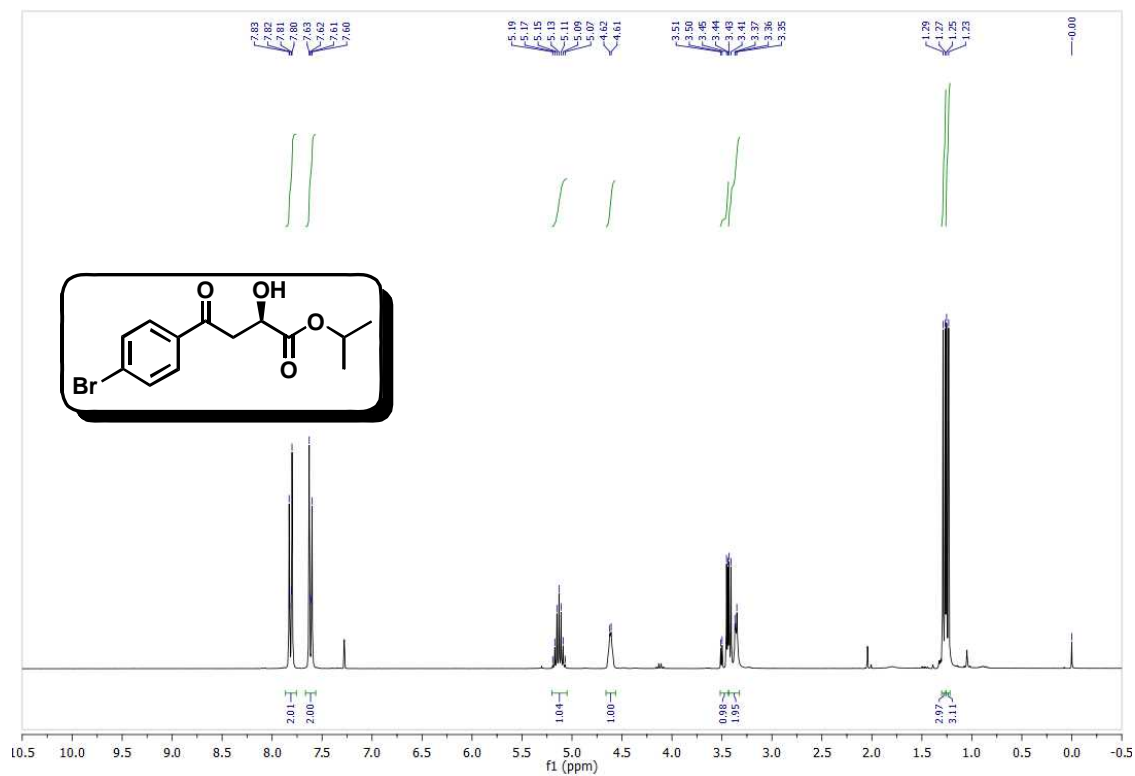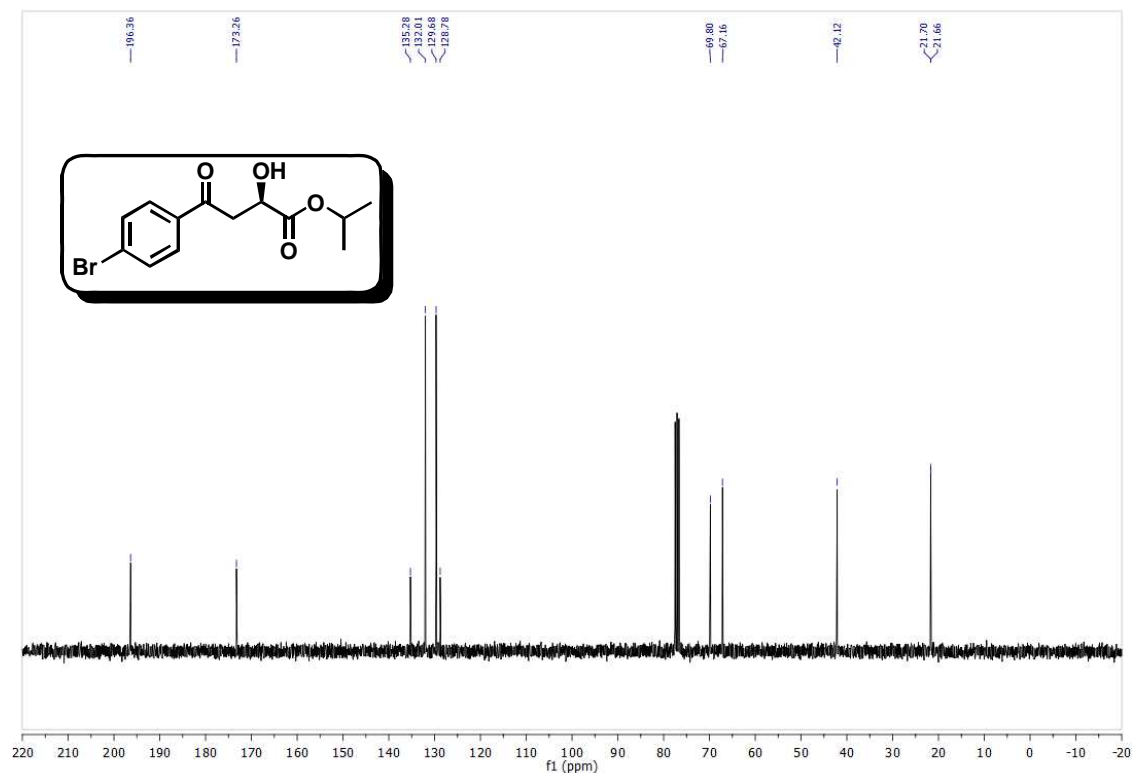

**(R)-isopropyl 2-hydroxy-4-(2-methoxyphenyl)-4-oxobutanoate**

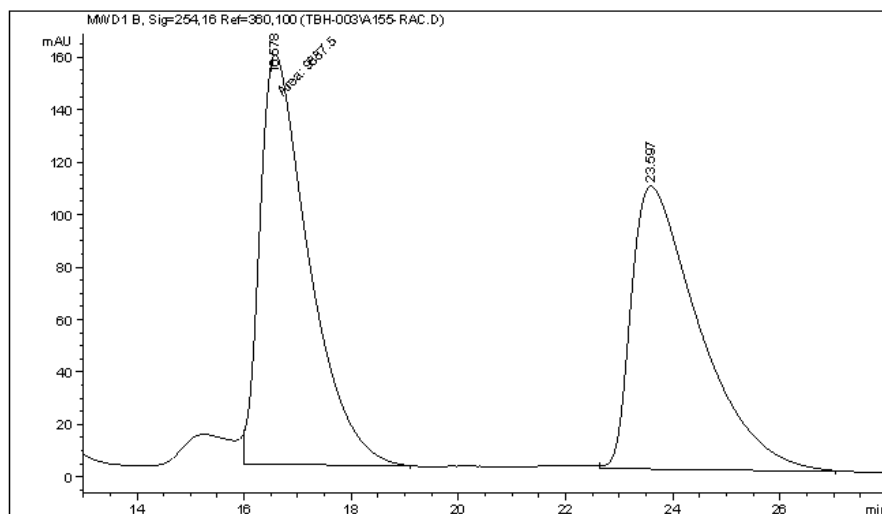

| Peak # | RetTime [min] | Type | Width [min] | Area [mAU*s] | Height [mAU] | Area %  |
|--------|---------------|------|-------------|--------------|--------------|---------|
| 1      | 16.578        | MM   | 1.0541      | 9887.50391   | 156.33430    | 50.9842 |
| 2      | 23.597        | VV   | 1.2025      | 9505.77734   | 107.82711    | 49.0158 |

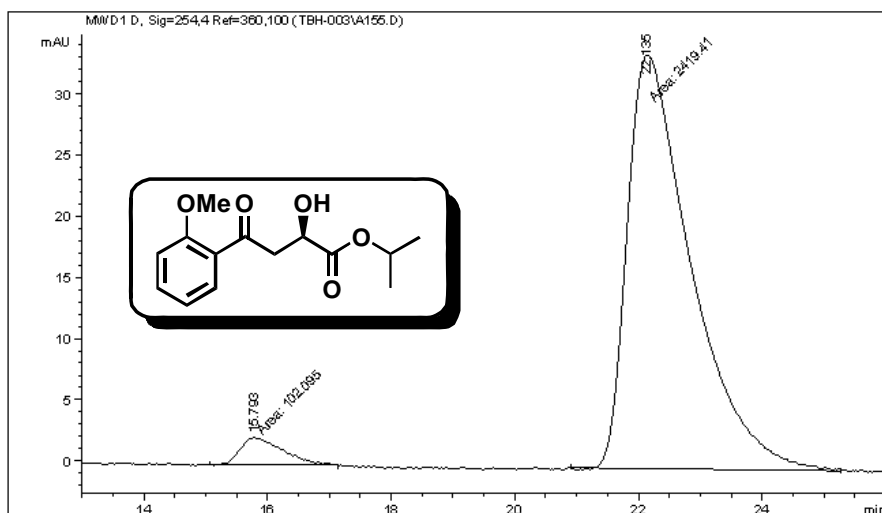

| Peak # | RetTime [min] | Type | Width [min] | Area [mAU*s] | Height [mAU] | Area %  |
|--------|---------------|------|-------------|--------------|--------------|---------|
| 1      | 15.793        | MM   | 0.7741      | 102.09519    | 2.19814      | 4.0490  |
| 2      | 22.135        | MM   | 1.1928      | 2419.40942   | 33.80698     | 95.9510 |

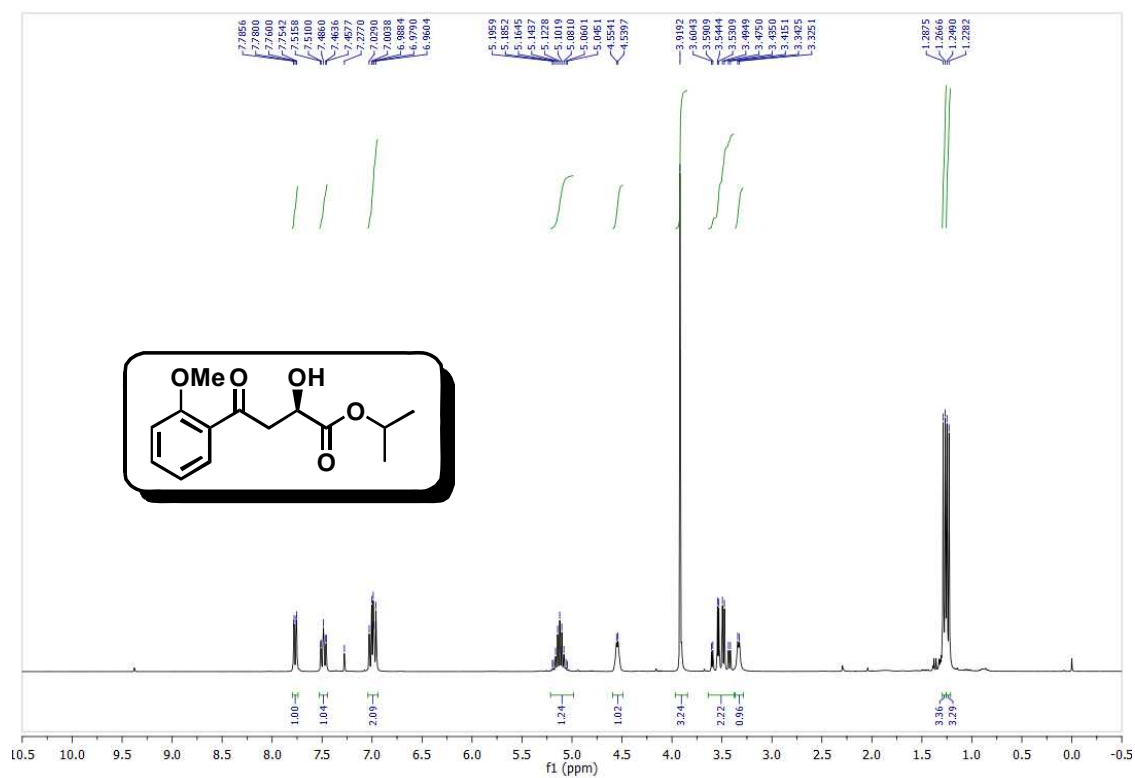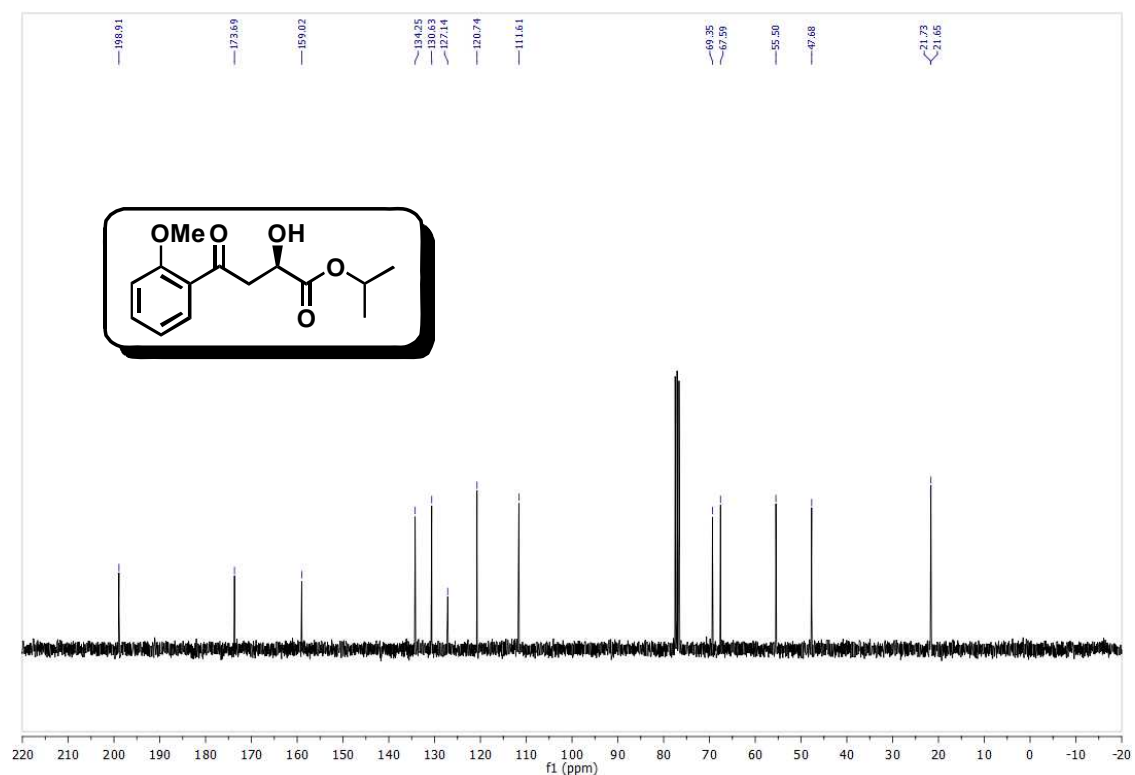

**(R)-isopropyl 2-hydroxy-4-(3-methoxyphenyl)-4-oxobutanoate**

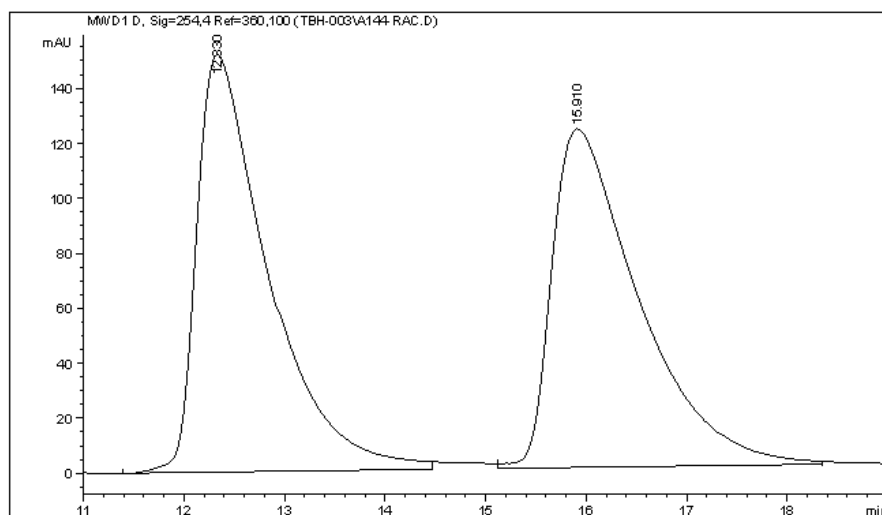

| Peak # | RetTime [min] | Type | Width [min] | Area [mAU*s] | Height [mAU] | Area %  |
|--------|---------------|------|-------------|--------------|--------------|---------|
| 1      | 12.330        | BV   | 0.7036      | 7511.45996   | 151.71510    | 50.3255 |
| 2      | 15.910        | VV   | 0.8224      | 7414.30713   | 123.15359    | 49.6745 |

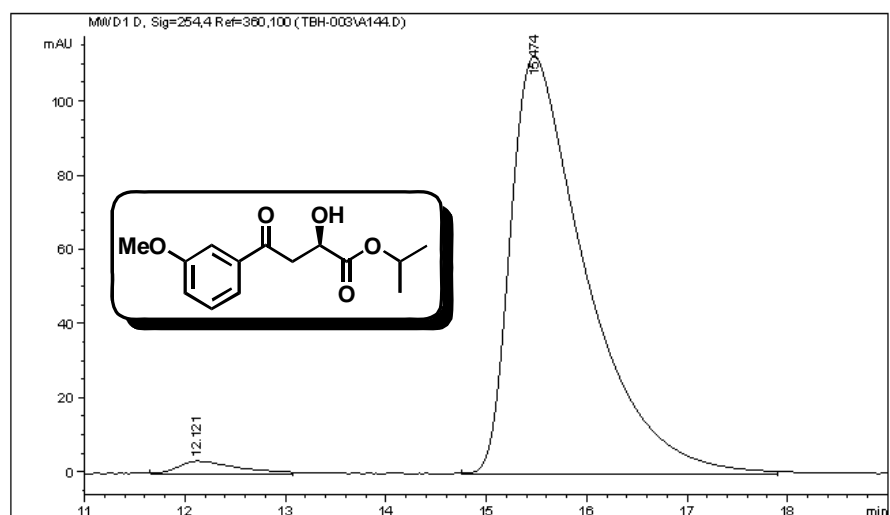

| Peak # | RetTime [min] | Type | Width [min] | Area [mAU*s] | Height [mAU] | Area %  |
|--------|---------------|------|-------------|--------------|--------------|---------|
| 1      | 12.121        | VV   | 0.4933      | 139.49068    | 3.40982      | 2.3205  |
| 2      | 15.474        | VV   | 0.7345      | 5871.62500   | 112.57883    | 97.6795 |

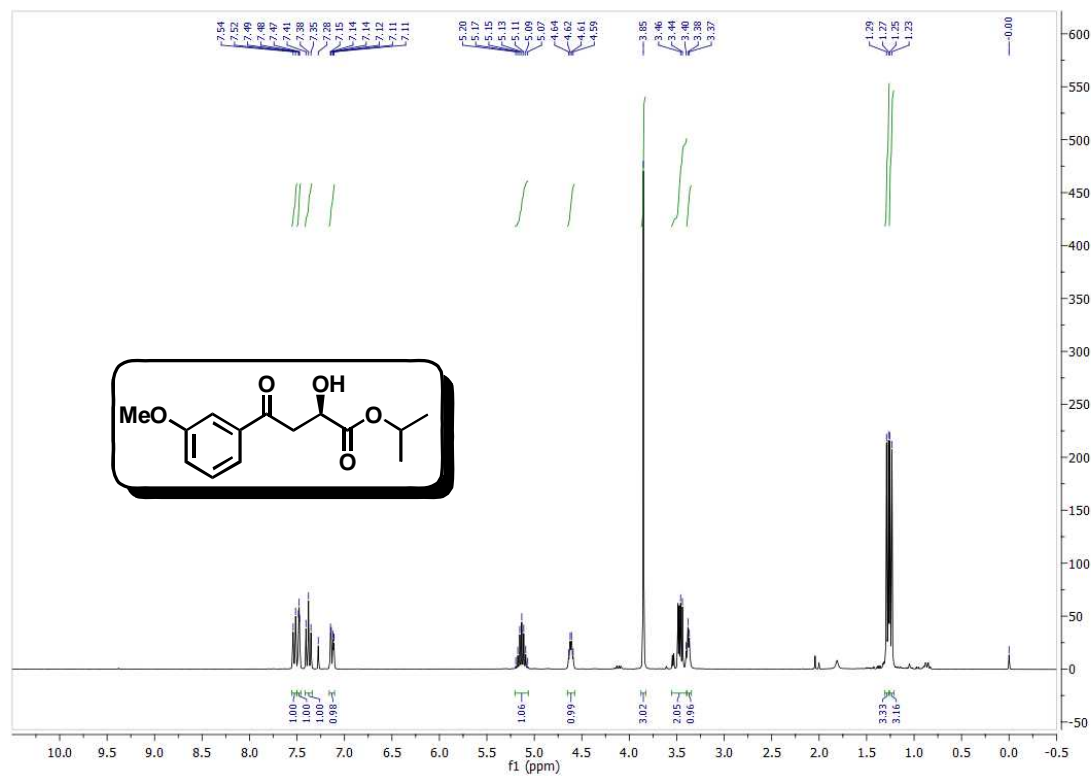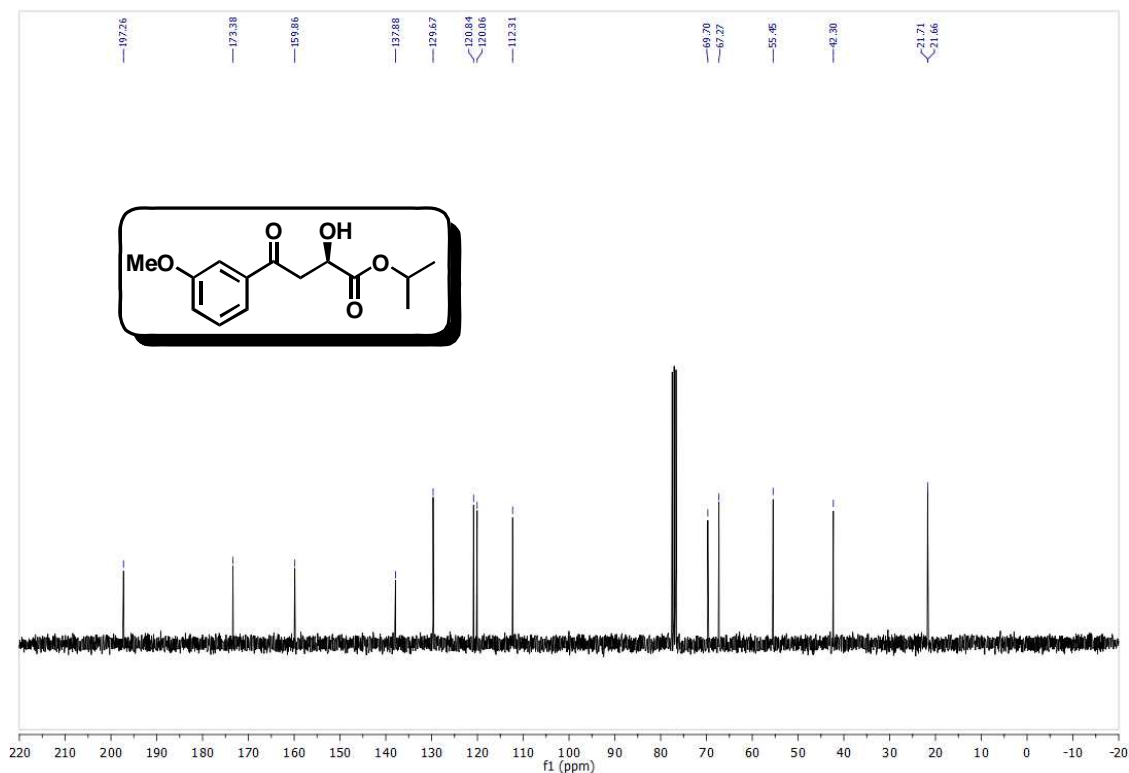

**(R)-isopropyl 2-hydroxy-4-(4-methoxyphenyl)-4-oxobutanoate**

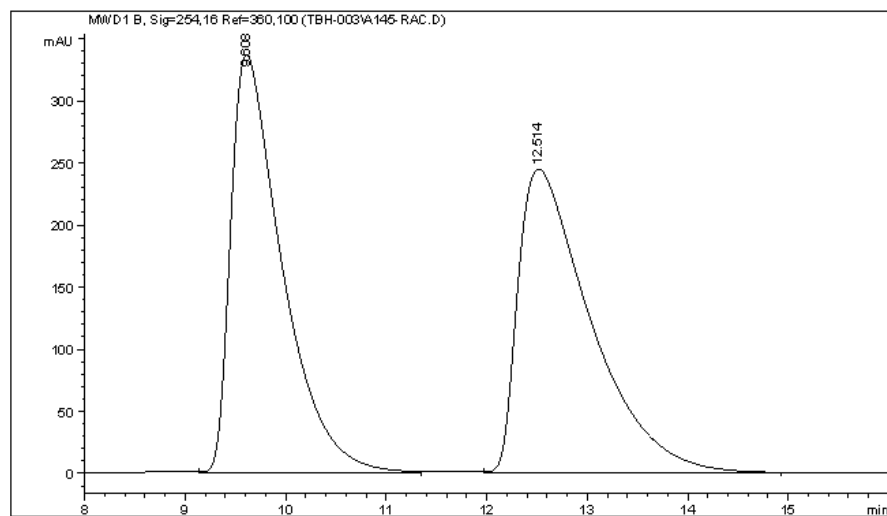

| Peak # | RetTime [min] | Type | Width [min] | Area [mAU*s] | Height [mAU] | Area %  |
|--------|---------------|------|-------------|--------------|--------------|---------|
| 1      | 9.608         | VB   | 0.5248      | 1.19906e4    | 337.22604    | 49.3060 |
| 2      | 12.514        | VB   | 0.7195      | 1.23282e4    | 244.81075    | 50.6940 |

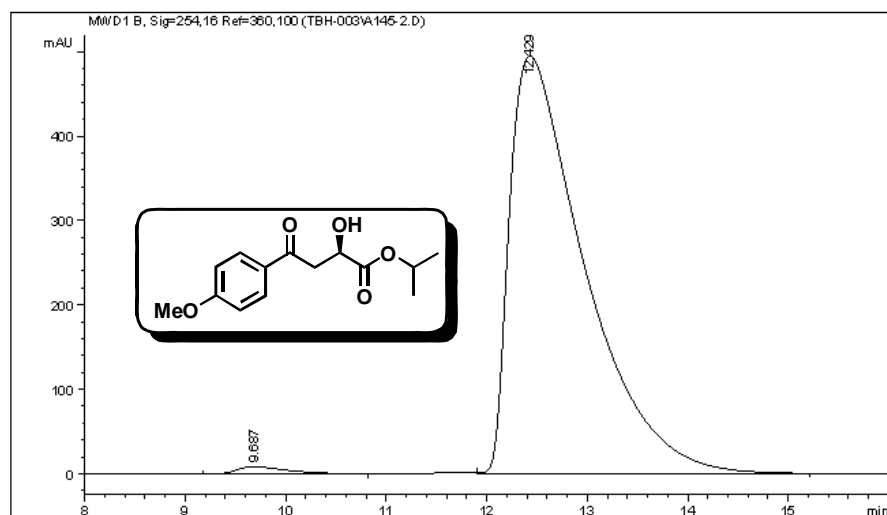

| Peak # | RetTime [min] | Type | Width [min] | Area [mAU*s] | Height [mAU] | Area %  |
|--------|---------------|------|-------------|--------------|--------------|---------|
| 1      | 9.687         | BV   | 0.4706      | 309.28354    | 8.74532      | 1.1911  |
| 2      | 12.429        | VB   | 0.7466      | 2.56577e4    | 495.12180    | 98.8089 |

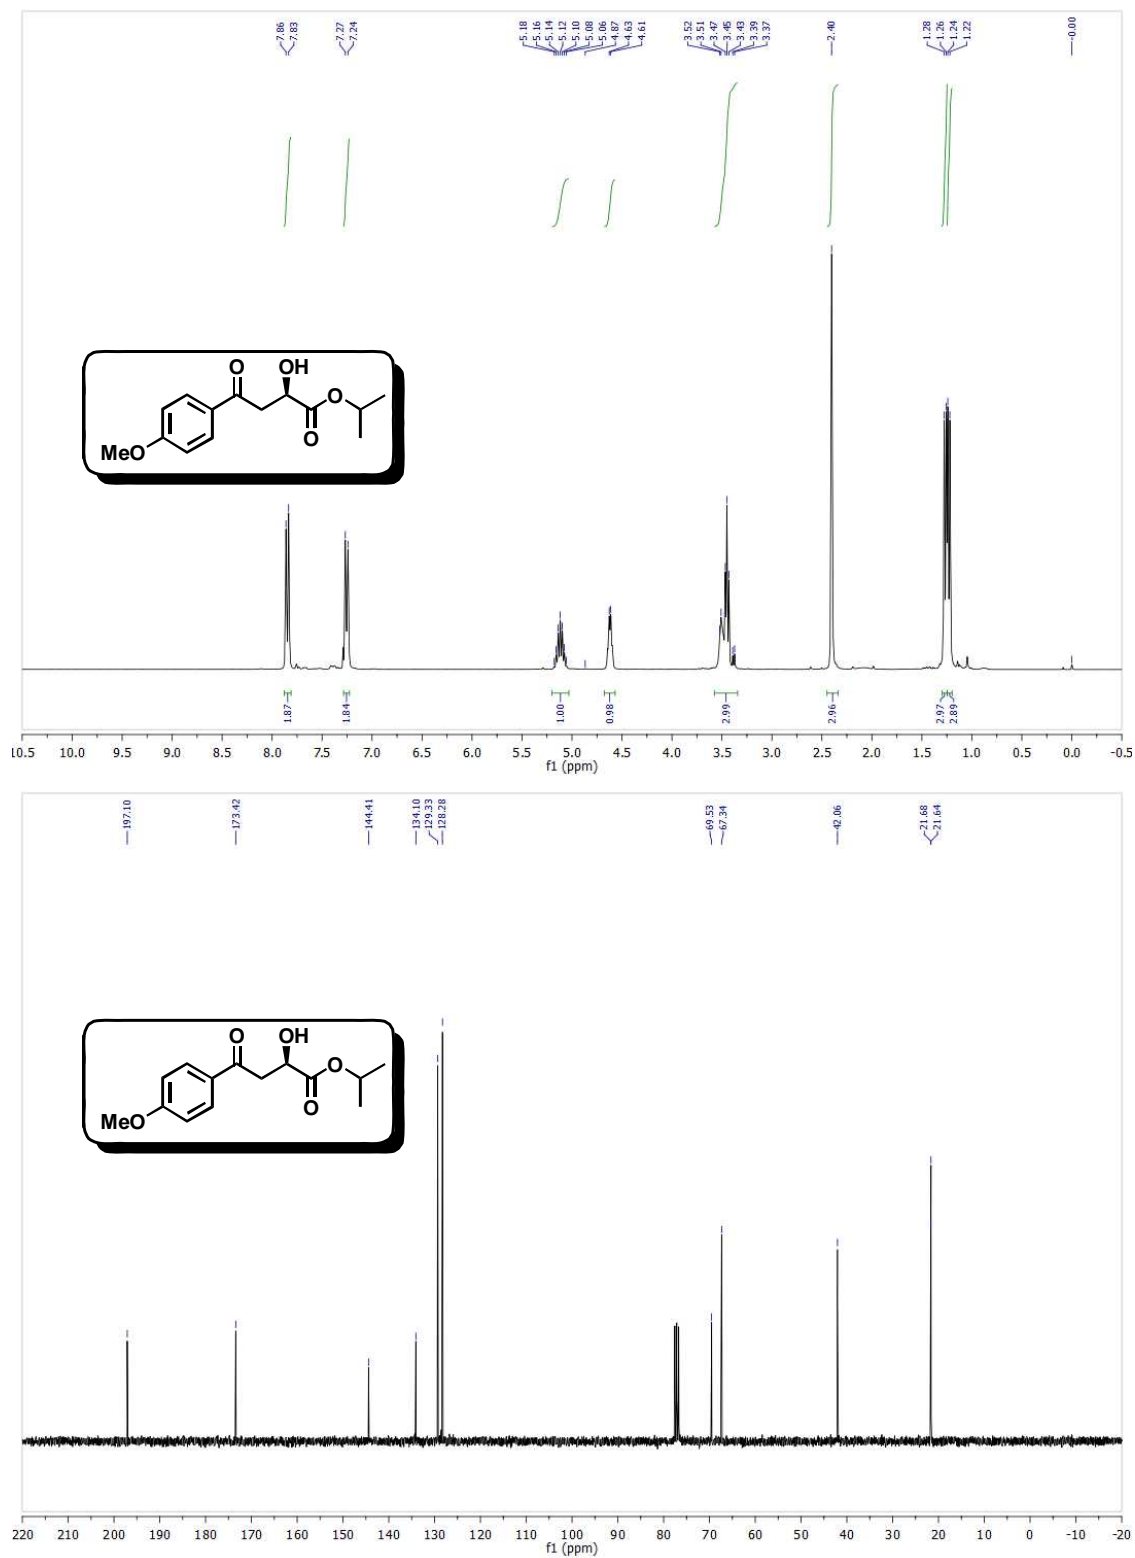

**(R)-isopropyl 2-hydroxy-4-(naphthalen-2-yl)-4-oxobutanoate**



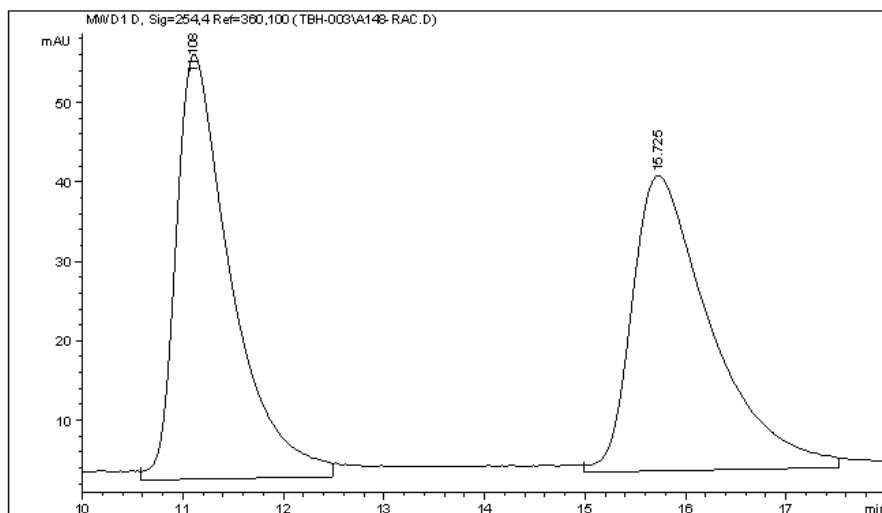

| Peak # | RetTime [min] | Type | Width [min] | Area [mAU*s] | Height [mAU] | Area %  |
|--------|---------------|------|-------------|--------------|--------------|---------|
| 1      | 11.108        | VV   | 0.5356      | 2025.58313   | 53.51257     | 49.9860 |
| 2      | 15.725        | BV   | 0.7242      | 2026.71643   | 37.16394     | 50.0140 |

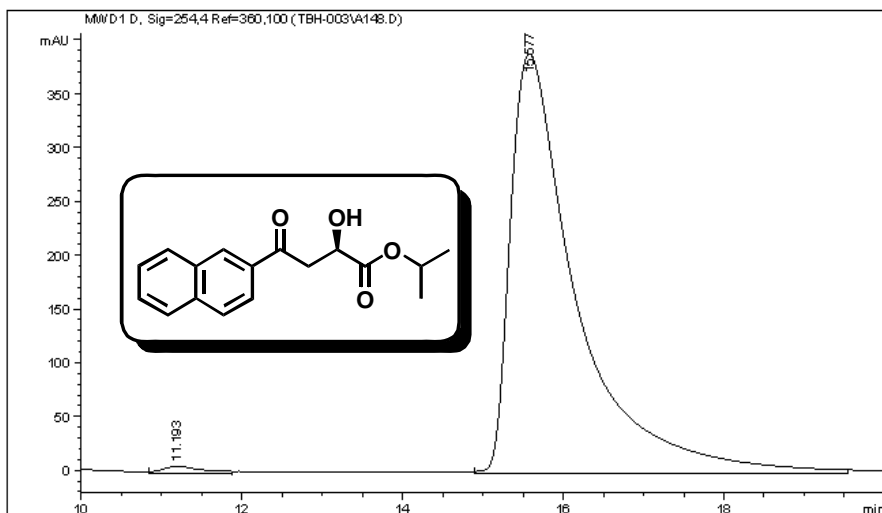

| Peak # | RetTime [min] | Type | Width [min] | Area [mAU*s] | Height [mAU] | Area %  |
|--------|---------------|------|-------------|--------------|--------------|---------|
| 1      | 11.193        | VV   | 0.4164      | 220.93372    | 6.53582      | 0.9807  |
| 2      | 15.577        | VB   | 0.8136      | 2.23075e4    | 389.80887    | 99.0193 |

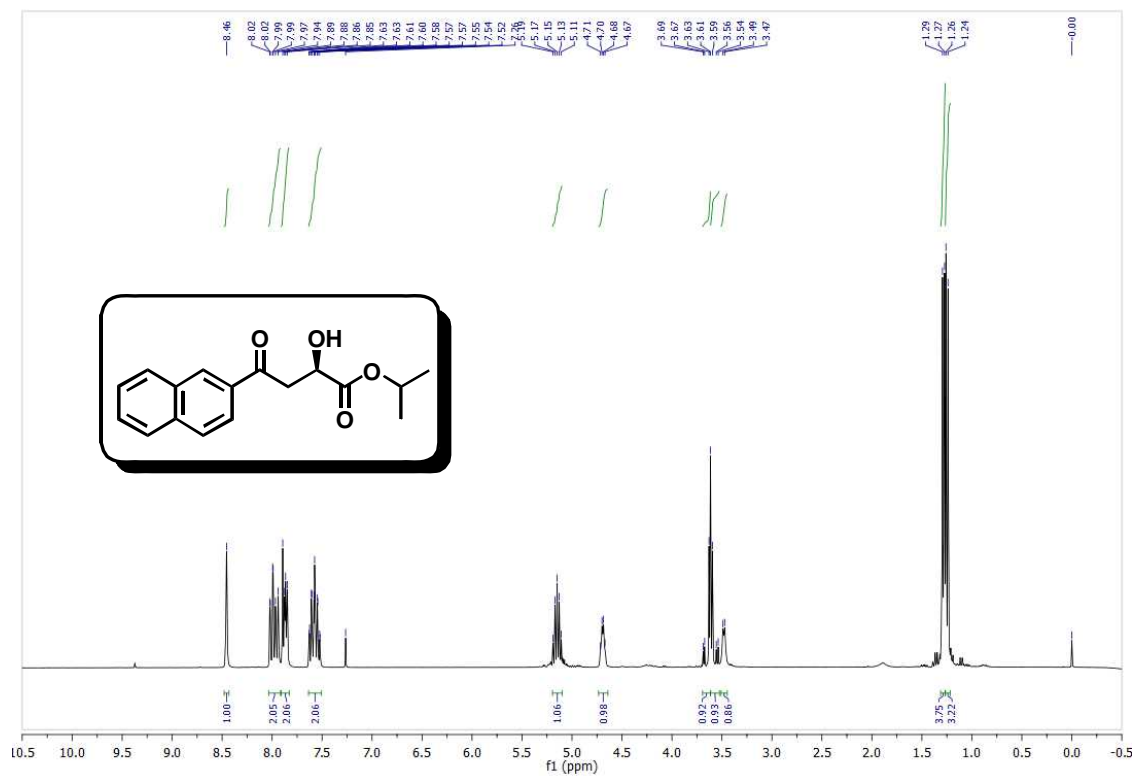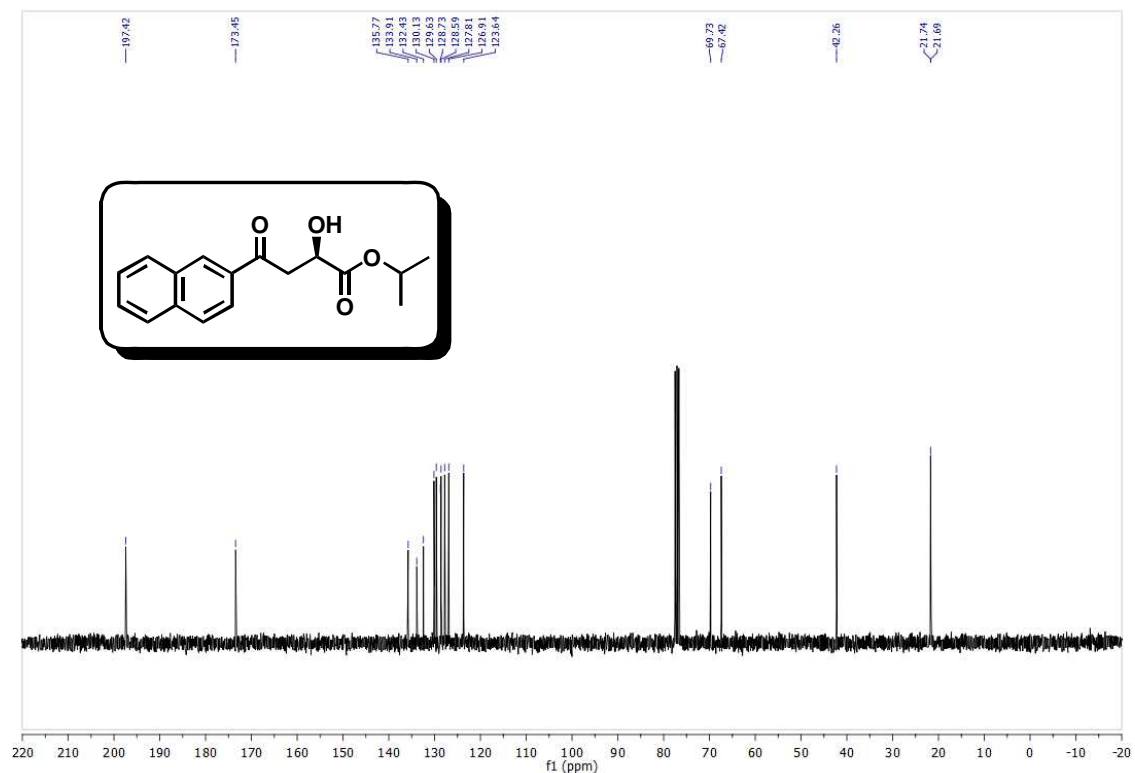

**(R)-isopropyl 4-(2,5-dimethylfuran-3-yl)-2-hydroxy-4-oxobutanoate**

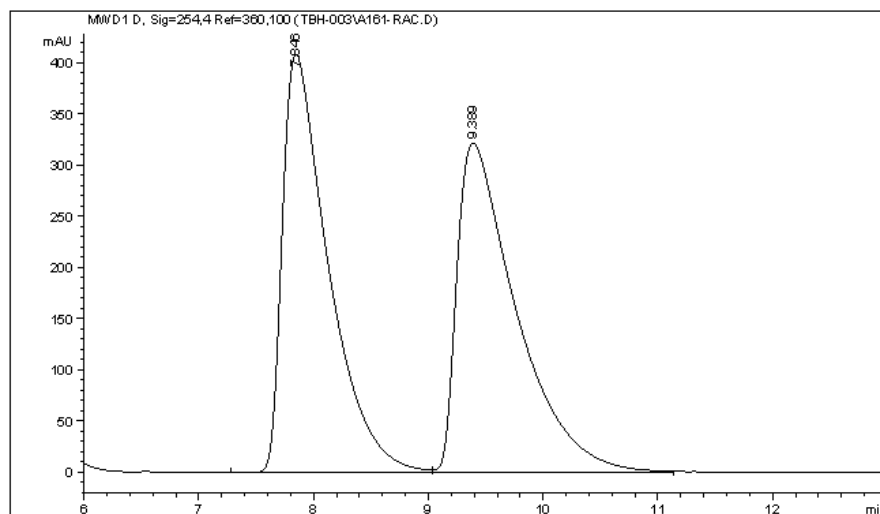

| Peak # | RetTime [min] | Type | Width [min] | Area [mAU*s] | Height [mAU] | Area %  |
|--------|---------------|------|-------------|--------------|--------------|---------|
| 1      | 7.846         | VV   | 0.4036      | 1.13255e4    | 408.29367    | 49.6027 |
| 2      | 9.389         | VV   | 0.5078      | 1.15069e4    | 321.30951    | 50.3973 |

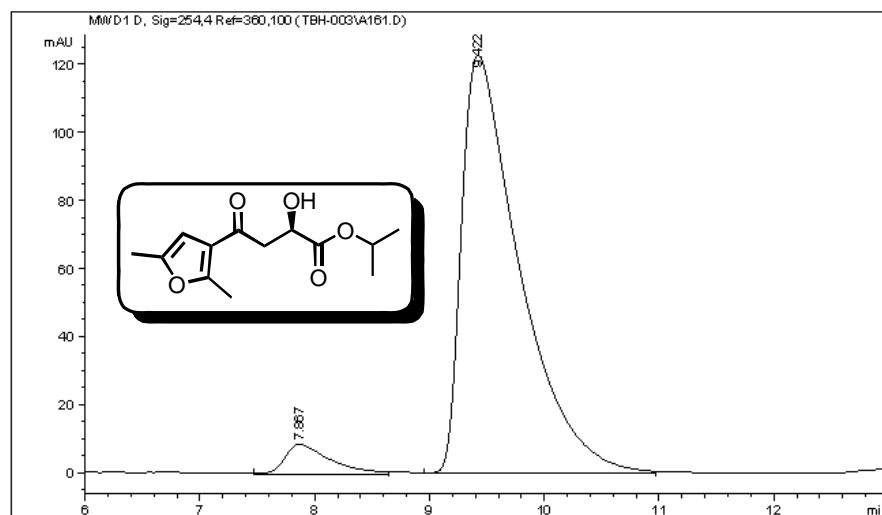

| Peak # | RetTime [min] | Type | Width [min] | Area [mAU*s] | Height [mAU] | Area %  |
|--------|---------------|------|-------------|--------------|--------------|---------|
| 1      | 7.867         | VV   | 0.3637      | 237.91139    | 8.73542      | 5.2142  |
| 2      | 9.422         | VV   | 0.5060      | 4324.84033   | 123.07326    | 94.7858 |

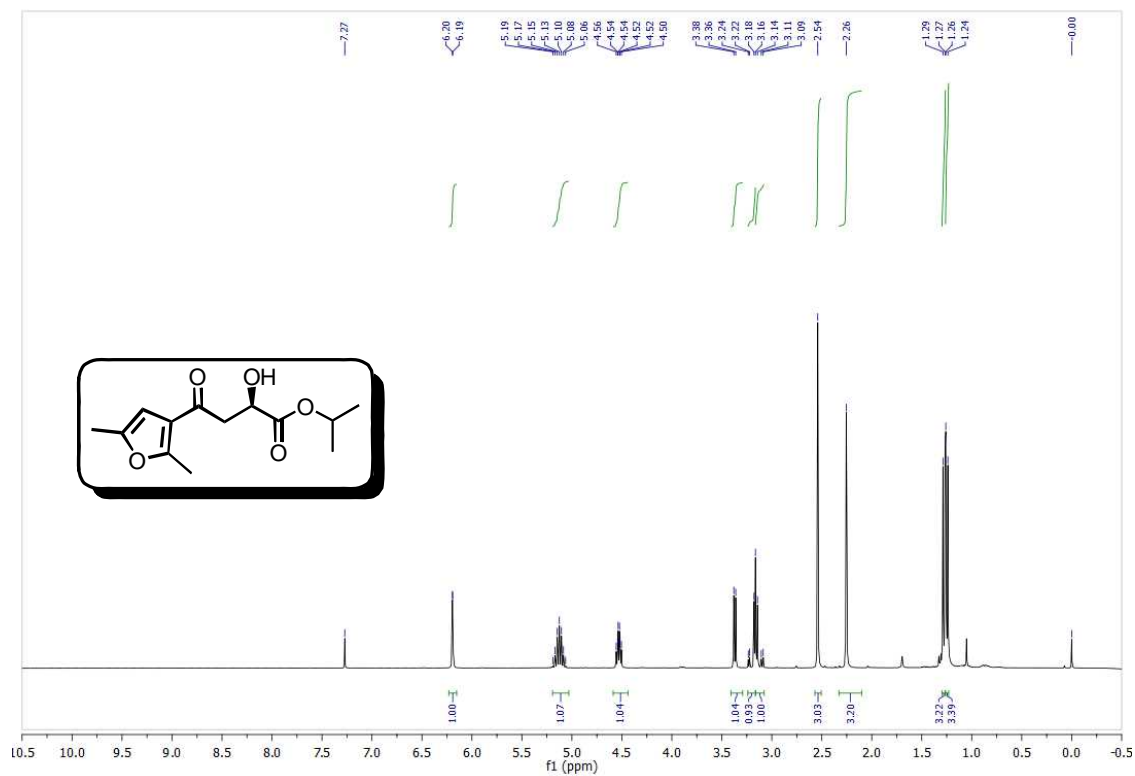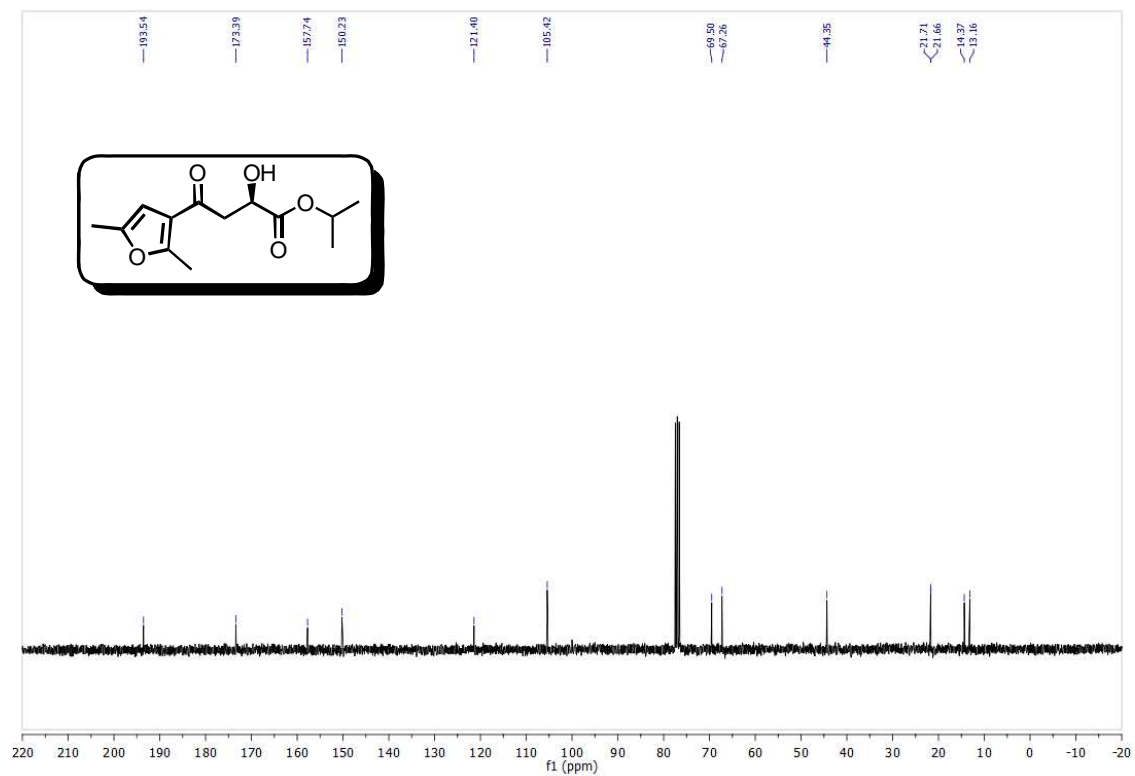

**(R)-isopropyl 4-(2,5-dimethylthiophen-3-yl)-2-hydroxy-4-oxobutanoate**

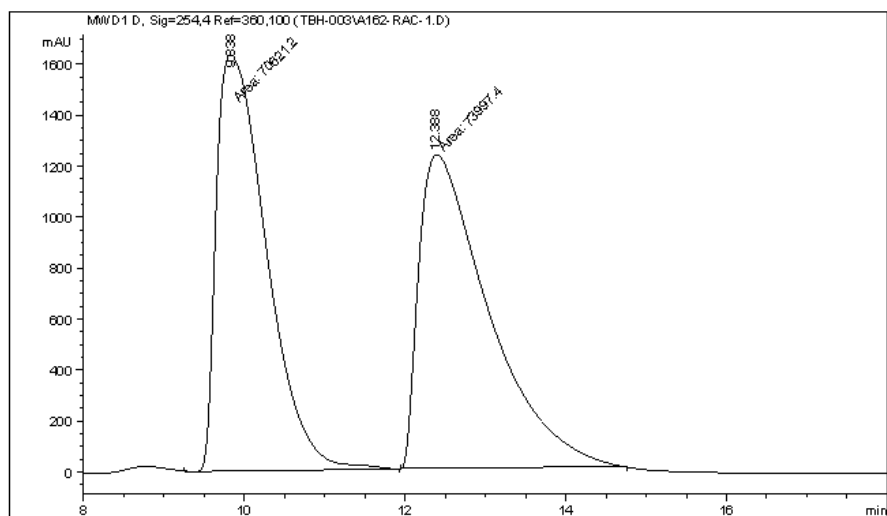

| Peak # | RetTime [min] | Type | Width [min] | Area [mAU*s] | Height [mAU] | Area %  |
|--------|---------------|------|-------------|--------------|--------------|---------|
| 1      | 9.838         | MM   | 0.7212      | 7.06212e4    | 1631.98828   | 48.8327 |
| 2      | 12.388        | MM   | 1.0046      | 7.39974e4    | 1227.62646   | 51.1673 |

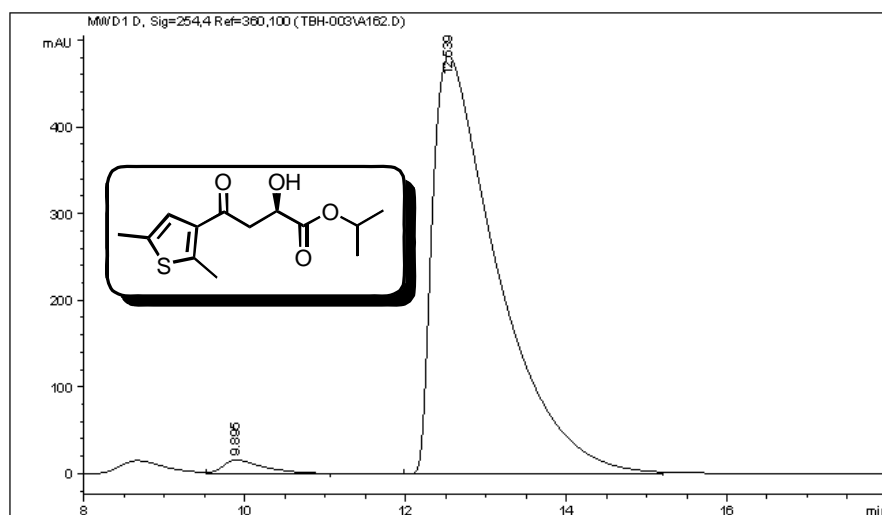

| Peak # | RetTime [min] | Type | Width [min] | Area [mAU*s] | Height [mAU] | Area %  |
|--------|---------------|------|-------------|--------------|--------------|---------|
| 1      | 9.895         | VV   | 0.4781      | 591.61829    | 16.43067     | 2.1344  |
| 2      | 12.539        | VV   | 0.7863      | 2.71261e4    | 482.17899    | 97.8656 |

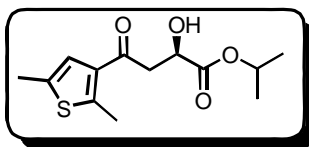

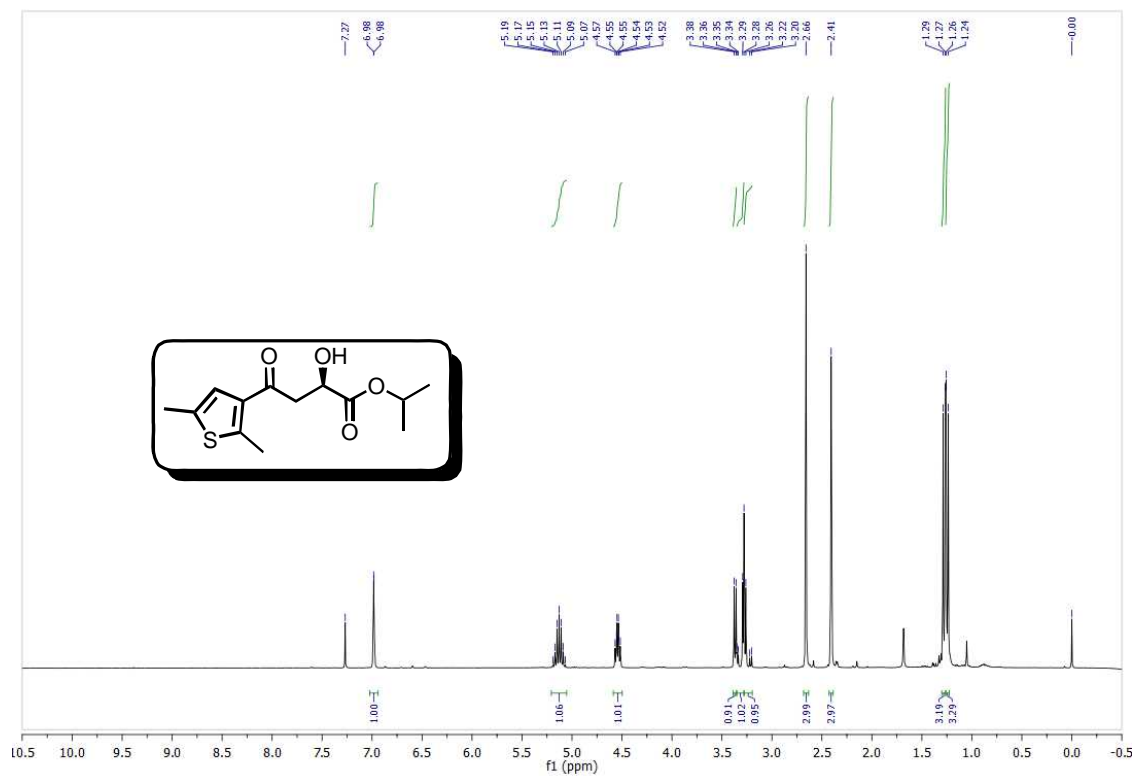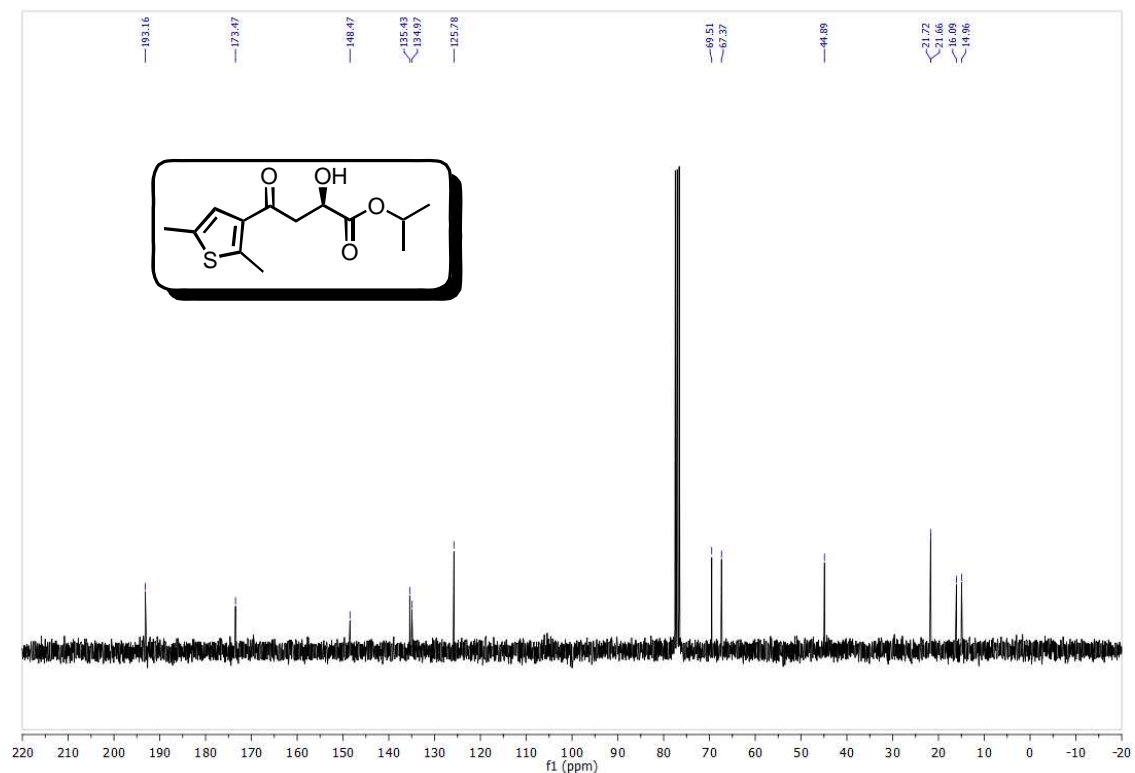

**(2R)-isopropyl 2-hydroxy-2-(1-oxo-2,3-dihydro-1H-inden-2-yl)acetate**

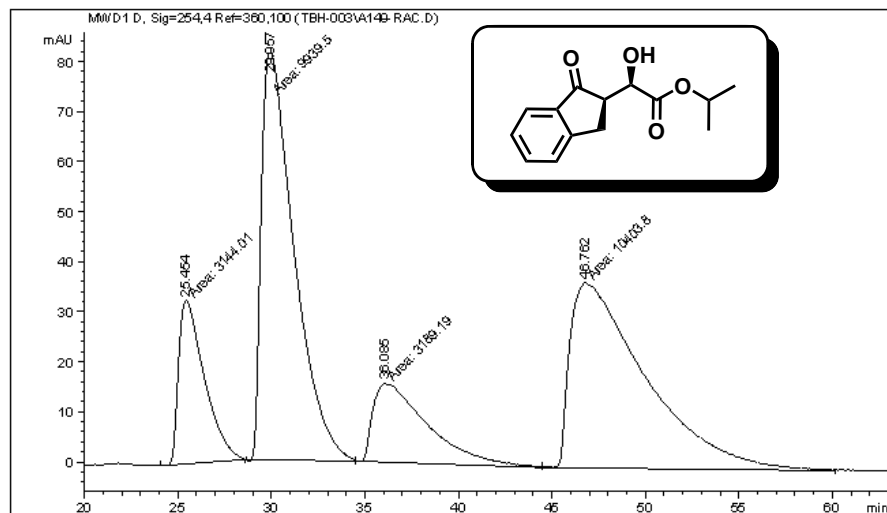

| Peak # | RetTime [min] | Type | Width [min] | Area [mAU*s] | Height [mAU] | Area %  |
|--------|---------------|------|-------------|--------------|--------------|---------|
| 1      | 25.454        | MM   | 1.6048      | 3144.01099   | 32.65192     | 11.7857 |
| 2      | 29.957        | MM   | 2.0364      | 9939.49707   | 81.34872     | 37.2594 |
| 3      | 36.085        | MM   | 3.3840      | 3189.19214   | 15.70726     | 11.9551 |
| 4      | 46.762        | MM   | 4.6861      | 1.04038e4    | 37.00249     | 38.9998 |

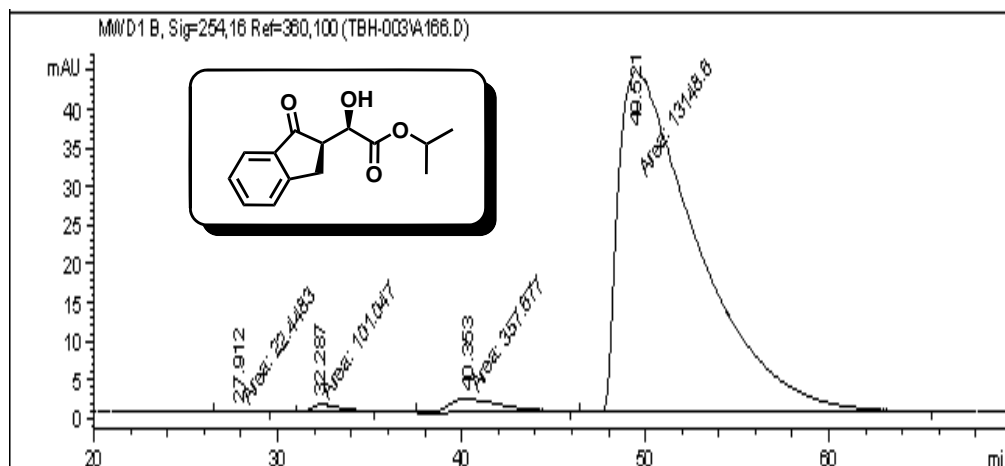

| Peak # | RetTime [min] | Type | Width [min] | Area [mAU*s] | Height [mAU] | Area %  |
|--------|---------------|------|-------------|--------------|--------------|---------|
| 1      | 27.912        | MM   | 1.5386      | 22.44826     | 2.43165e-1   | 0.1647  |
| 2      | 32.287        | MM   | 1.7511      | 101.04681    | 9.61745e-1   | 0.7414  |
| 3      | 40.353        | MM   | 3.2642      | 357.67703    | 1.82628      | 2.6242  |
| 4      | 49.521        | MM   | 4.9573      | 1.31486e4    | 44.20634     | 96.4697 |

A166; 1H, 300MHz; 090310

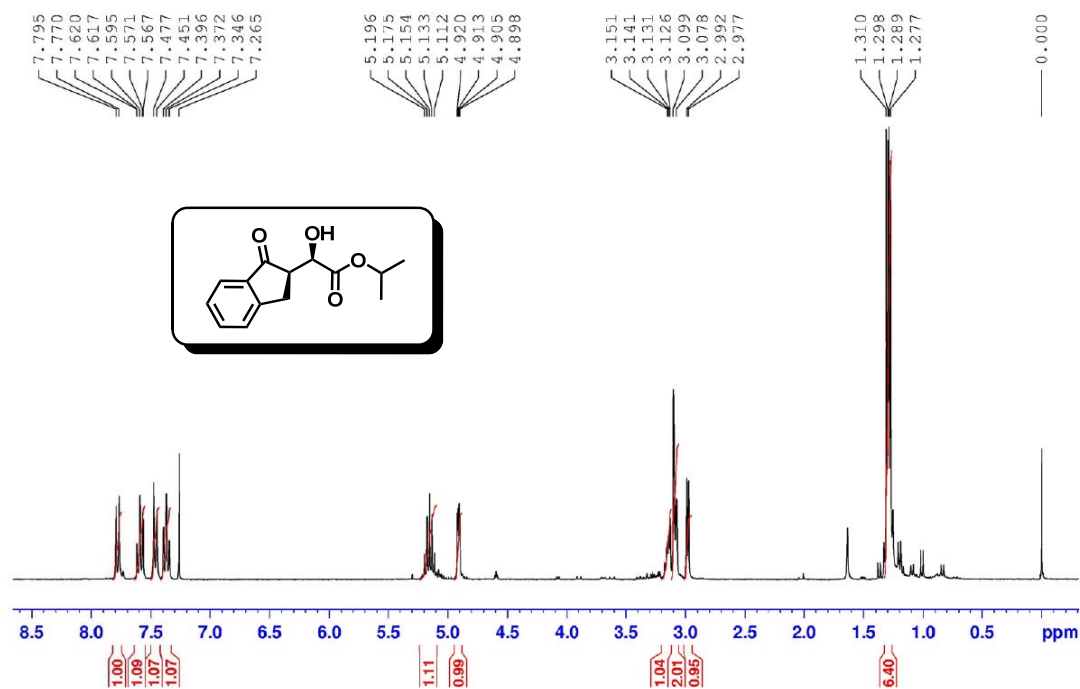

A149, 13C NMR CDC13 290110 300MHz

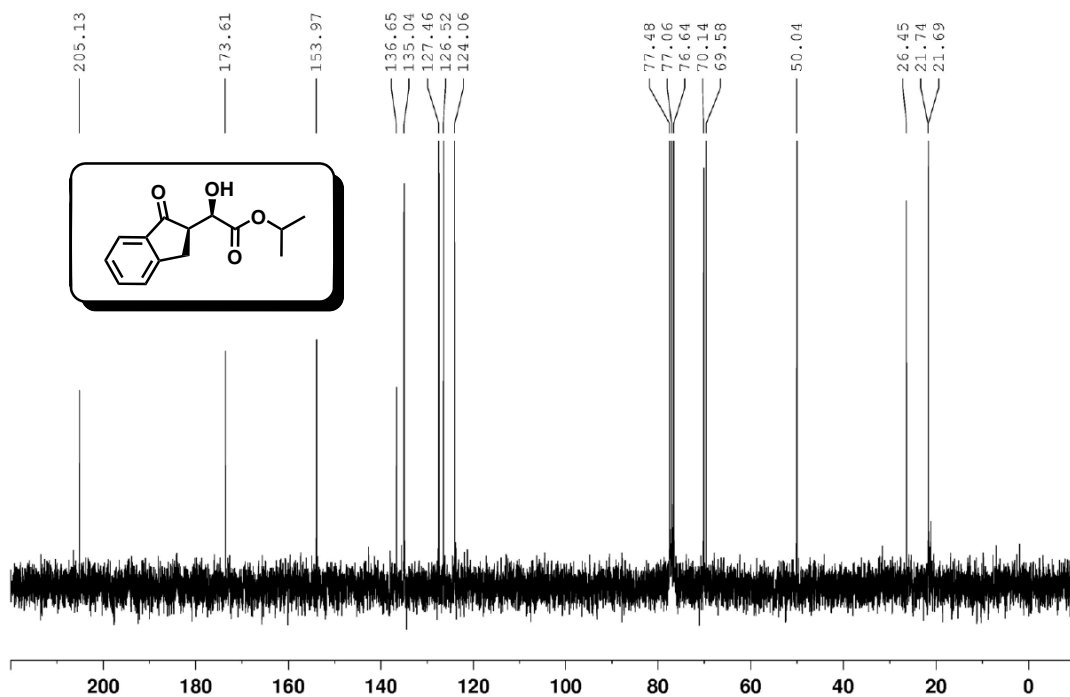



A174-2 1H, 400 MHz, 14042010

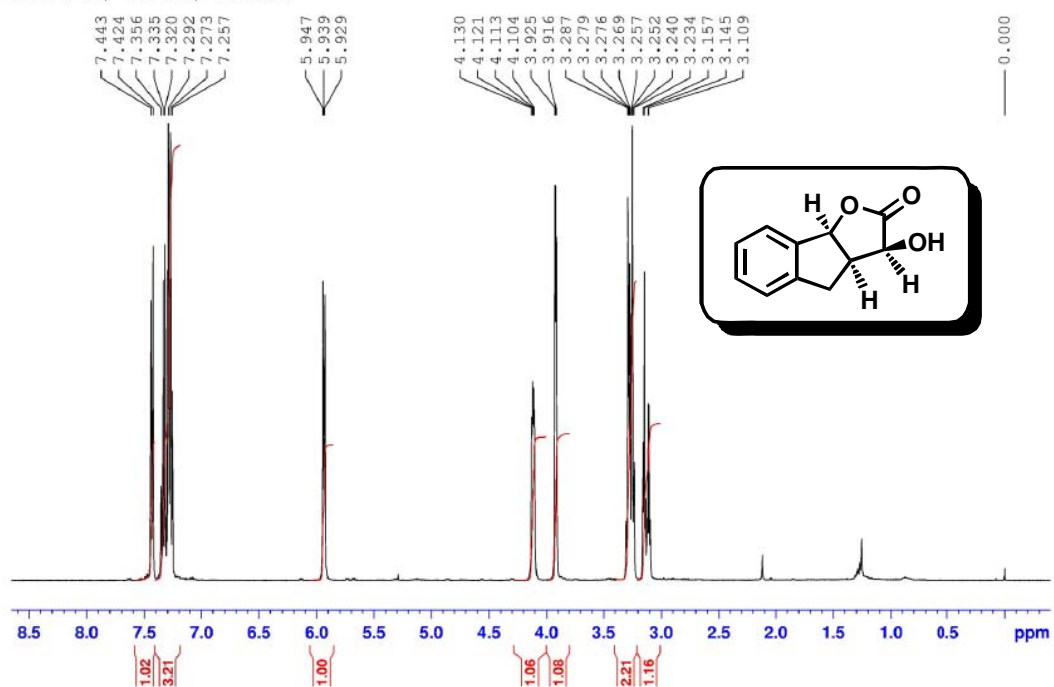

A174-2 13C 400 MHz, 14042010

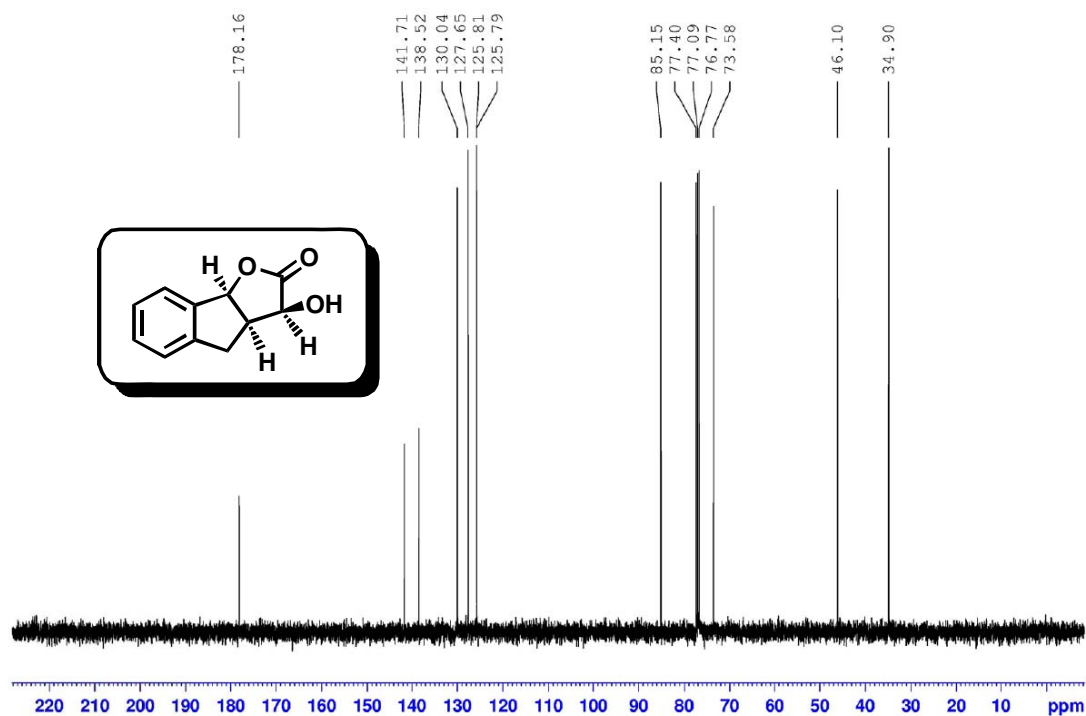

Supplement: c0sc00454e.pdf [file c0sc00454e.pdf]
